# Supplementary material for: Hydrochemical disturbances measured in groundwater during the construction and operation of a large-scale underground facility in deep crystalline rock in Japan
Source: Springer Nature journal article supplement (doi:10.1007/s12665-015-4337-3), 2015-04-07
Supplement: MOESM1 [file 11841478]

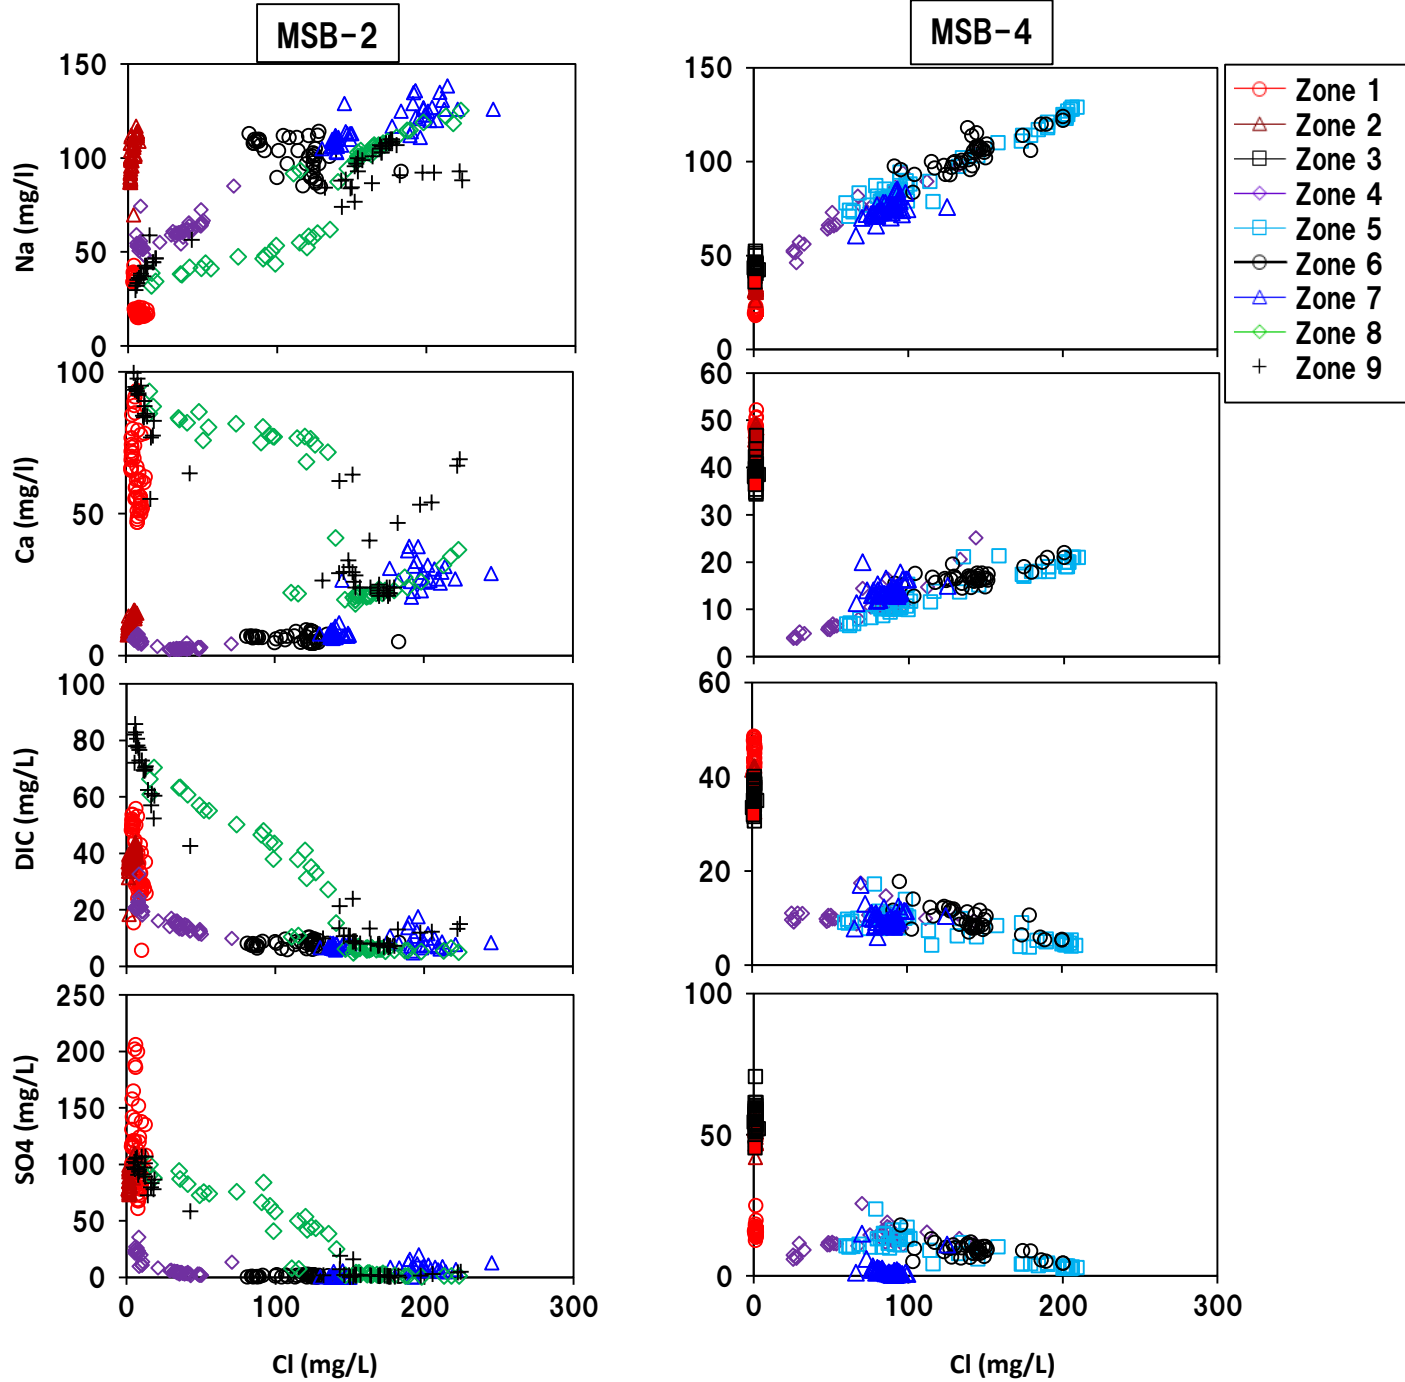

Fig. Relationship of chloride and other chemical components concentrations in MSB-2, 4.

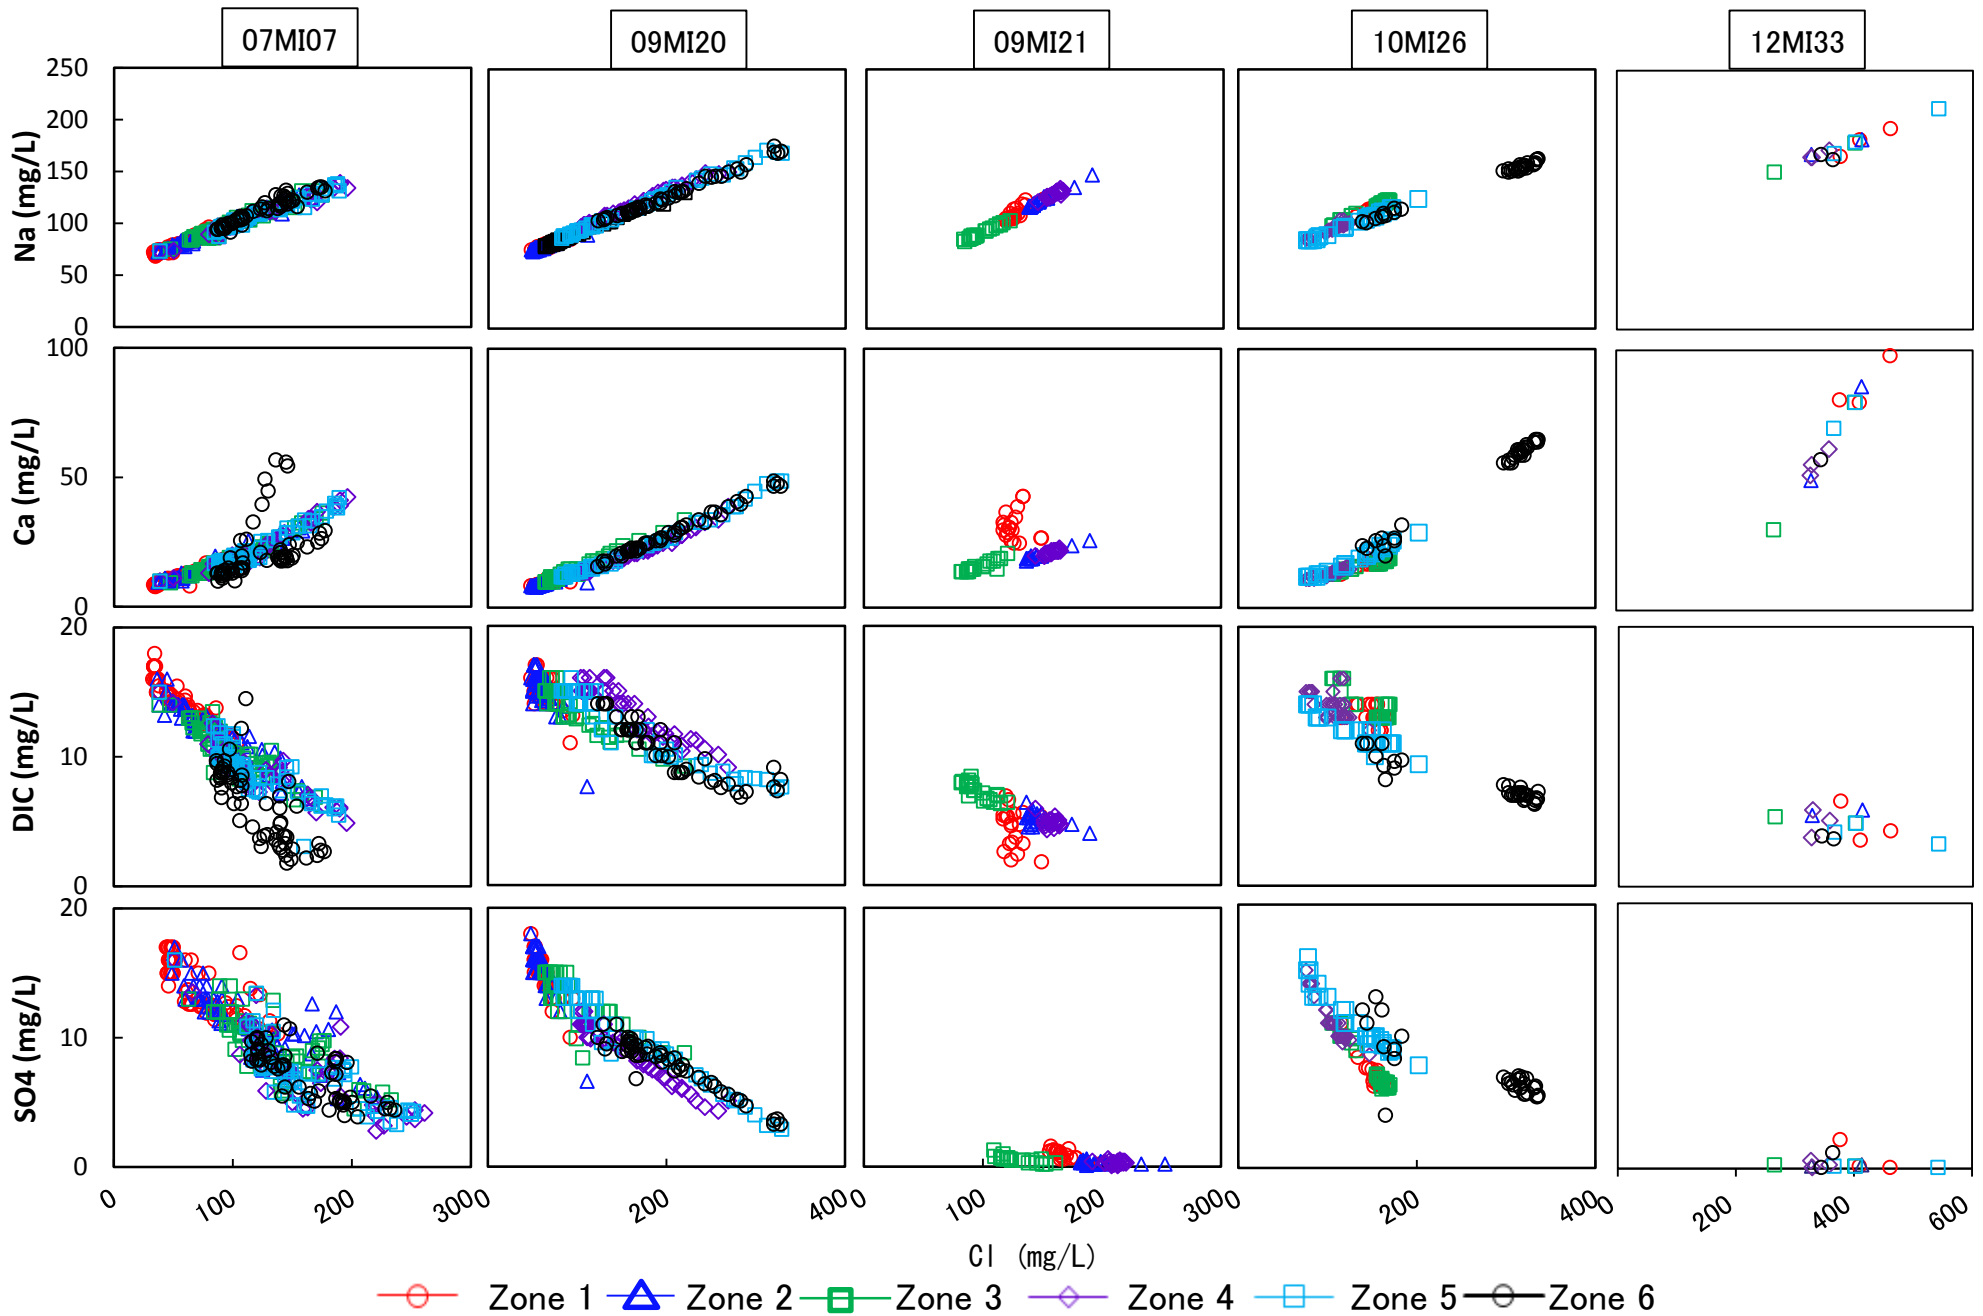

Fig. Relationship of chloride and other chemical components concentrations in the galleries.
