# Supplementary material for: Hydrochemical disturbances measured in groundwater during the construction and operation of a large-scale underground facility in deep crystalline rock in Japan
Source: Springer Nature journal article supplement (doi:10.1007/s12665-015-4337-3), 2015-04-07
Supplement: MOESM2 [file 11841478]

## Online resource 2

Table Chemical data and principal component value of groundwaters in each borehole

| Borehole-<br>Zone No. | Sampling date | Na<br>(mg/L) | K<br>(mg/L) | Ca<br>(mg/L) | DIC<br>(mg/L) | SO <sub>4</sub><br>(mg/L) | F<br>(mg/L) | Cl<br>(mg/L) | PC 1  | PC 2  |
|-----------------------|---------------|--------------|-------------|--------------|---------------|---------------------------|-------------|--------------|-------|-------|
| MSB4-4                | 07/11/2003    | 76.0         | 1.6         | 14.4         | 17.4          | 25.6                      | 7.6         | 70.1         | -0.96 | 4.11  |
| MSB4-4                | 08/12/2003    | 80.0         | 1.9         | 16.4         | 14.7          | 19.1                      | 7.3         | 86.4         | 0.27  | 3.13  |
| MSB4-4                | 09/11/2003    | 98.3         | 1.7         | 20.6         | 10.8          | 13.3                      | 9.3         | 133.0        | 0.78  | 1.00  |
| MSB4-4                | 10/11/2003    | 104.0        | 1.6         | 25.1         | 9.4           | 11.4                      | 9.3         | 143.0        | 1.13  | 0.50  |
| MSB4-4                | 11/20/2003    | 89.5         | 1.3         | 14.7         | 9.8           | 15.5                      | 9.1         | 112.0        | 0.05  | 0.89  |
| MSB4-4                | 12/11/2003    | 79.9         | 2.5         | 11.3         | 10.6          | 14.8                      | 9.2         | 82.0         | 1.14  | 1.65  |
| MSB4-4                | 01/23/2004    | 75.5         | 1.2         | 10.5         | 10.6          | 14.6                      | 9.8         | 75.2         | -0.64 | 0.52  |
| MSB4-4                | 02/13/2004    | 77.5         | 1.2         | 11.2         | 10.4          | 12.7                      | 9.9         | 87.7         | -0.39 | 0.23  |
| MSB4-4                | 03/10/2004    | 80.5         | 1.2         | 10.2         | 11.0          | 17.1                      | 10.2        | 87.9         | -0.71 | 0.85  |
| MSB4-4                | 04/13/2004    | 79.2         | 1.2         | 10.9         | 11.0          | 17.5                      | 10.7        | 86.4         | -0.85 | 0.75  |
| MSB4-4                | 05/11/2004    | 77.6         | 1.2         | 10.6         | 10.8          | 15.7                      | 10.0        | 82.4         | -0.67 | 0.66  |
| MSB4-4                | 06/16/2004    | 77.8         | 1.2         | 10.6         | 11.1          | 16.4                      | 11.4        | 84.8         | -0.96 | 0.39  |
| MSB4-4                | 07/26/2004    | 76.6         | 1.2         | 10.4         | 11.0          | 13.6                      | 8.3         | 88.8         | -0.20 | 0.96  |
| MSB4-4                | 08/17/2004    | 73.0         | 1.2         | 10.5         | 10.5          | 14.5                      | 9.4         | 80.8         | -0.50 | 0.65  |
| MSB4-4                | 09/10/2004    | 83.8         | 1.3         | 11.2         | 10.7          | 13.6                      | 10.0        | 89.9         | -0.35 | 0.41  |
| MSB4-4                | 10/21/2004    | 80.7         | 1.3         | 11.2         | 10.6          | 15.1                      | 9.8         | 87.5         | -0.41 | 0.68  |
| MSB4-4                | 11/19/2004    | 86.3         | 1.3         | 11.3         | 9.9           | 13.8                      | 9.9         | 91.5         | -0.16 | 0.37  |
| MSB4-4                | 12/24/2004    | 84.1         | 1.2         | 10.9         | 9.8           | 13.2                      | 10.1        | 92.2         | -0.29 | 0.16  |
| MSB4-4                | 01/25/2005    | 82.2         | 1.3         | 10.7         | 9.2           | 13.2                      | 10.7        | 90.3         | -0.34 | -0.10 |
| MSB4-4                | 02/15/2005    | 81.2         | 1.3         | 10.3         | 9.2           | 12.0                      | 9.7         | 85.2         | -0.08 | 0.05  |
| MSB4-4                | 05/18/2005    | 81.0         | 1.0         | 9.9          | 8.3           | 12.3                      | 7.9         | 90.1         | -0.01 | 0.30  |
| MSB4-4                | 08/22/2005    | 72.9         | 0.7         | 6.9          | 10.5          | 11.9                      | 9.9         | 50.8         | -1.24 | -0.28 |
| MSB4-4                | 11/30/2005    | 81.7         | 0.7         | 7.9          | 8.7           | 10.7                      | 9.9         | 67.4         | -0.80 | -0.70 |
| MSB4-4                | 02/24/2006    | 94.1         | 0.6         | 11.0         | 7.8           | 11.0                      | 10.3        | 96.6         | -0.60 | -0.94 |
| MSB4-4                | 06/15/2006    | 64.1         | 0.9         | 5.8          | 9.8           | 11.0                      | 10.6        | 47.7         | -1.18 | -0.62 |
| MSB4-4                | 08/07/2006    | 65.0         | 0.8         | 5.7          | 10.5          | 11.0                      | 10.8        | 49.1         | -1.38 | -0.63 |
| MSB4-4                | 11/17/2006    | 66.1         | 0.8         | 6.2          | 9.2           | 11.8                      | 10.1        | 48.2         | -1.15 | -0.52 |
| MSB4-4                | 02/07/2007    | 65.3         | 0.9         | 6.3          | 9.4           | 11.4                      | 10.5        | 49.4         | -1.11 | -0.59 |
| MSB4-4                | 05/11/2007    | 65.7         | 0.8         | 6.4          | 9.8           | 11.5                      | 10.5        | 51.8         | -1.26 | -0.58 |
| MSB4-4                | 08/10/2007    | 66.5         | 0.8         | 6.5          | 9.8           | 11.4                      | 10.0        | 53.4         | -1.14 | -0.43 |
| MSB4-4                | 11/19/2007    | 56.1         | 0.8         | 4.9          | 10.9          | 9.2                       | 10.8        | 32.5         | -1.52 | -0.85 |
| MSB4-4                | 02/07/2008    | 57.2         | 0.7         | 5.2          | 11.0          | 11.6                      | 11.2        | 29.4         | -1.86 | -0.69 |
| MSB4-4                | 06/23/2008    | 52.0         | 0.7         | 3.9          | 9.6           | 7.4                       | 11.2        | 25.5         | -1.59 | -1.52 |
| MSB4-4                | 08/26/2008    | 46.2         | 0.6         | 3.9          | 9.8           | 6.3                       | 8.4         | 27.5         | -1.20 | -0.84 |
| MSB4-4                | 11/12/2008    | 51.5         | 0.7         | 4.2          | 9.1           | 6.9                       | 11.0        | 26.9         | -1.48 | -1.60 |
| MSB4-4                | 01/21/2009    | 52.6         | 0.7         | 4.0          | 11.0          | 5.9                       | 11.1        | 25.5         | -1.61 | -1.46 |
| MSB4-5                | 07/11/2003    | 87.3         | 1.2         | 13.1         | 17.2          | 23.7                      | 6.6         | 79.0         | -0.96 | 3.87  |
| MSB4-5                | 08/12/2003    | 87.0         | 1.4         | 15.3         | 13.9          | 17.3                      | 6.9         | 99.1         | 0.08  | 2.56  |
| MSB4-5                | 09/11/2003    | 102.0        | 1.3         | 21.1         | 9.9           | 11.8                      | 9.2         | 135.0        | 0.57  | 0.42  |
| MSB4-5                | 10/11/2003    | 110.0        | 1.3         | 21.3         | 8.4           | 10.4                      | 9.3         | 158.0        | 1.05  | 0.02  |
| MSB4-5                | 12/11/2003    | 83.4         | 1.0         | 11.8         | 10.5          | 14.3                      | 9.3         | 92.7         | -0.53 | 0.53  |
| MSB4-5                | 01/23/2004    | 79.3         | 1.0         | 10.3         | 10.7          | 15.1                      | 9.7         | 83.9         | -0.84 | 0.49  |
| MSB4-5                | 02/13/2004    | 89.8         | 1.0         | 12.2         | 9.9           | 13.0                      | 9.3         | 98.6         | -0.33 | 0.24  |
| MSB4-5                | 03/10/2004    | 85.4         | 1.0         | 11.3         | 10.2          | 14.8                      | 10.2        | 84.6         | -0.78 | 0.22  |
| MSB4-5                | 04/13/2004    | 84.9         | 0.9         | 10.7         | 10.6          | 16.3                      | 10.7        | 94.9         | -1.08 | 0.28  |
| MSB4-5                | 05/11/2004    | 81.7         | 0.9         | 10.6         | 10.6          | 13.2                      | 8.8         | 79.9         | -0.54 | 0.48  |
| MSB4-5                | 06/16/2004    | 80.5         | 0.9         | 10.3         | 11.1          | 16.3                      | 11.6        | 89.7         | -1.38 | 0.07  |
| MSB4-5                | 07/26/2004    | 79.0         | 0.9         | 10.0         | 10.5          | 14.1                      | 9.0         | 99.4         | -0.70 | 0.47  |
| MSB4-5                | 08/17/2004    | 78.9         | 0.9         | 10.1         | 11.4          | 13.4                      | 9.3         | 81.9         | -0.78 | 0.46  |
| MSB4-5                | 09/10/2004    | 88.1         | 0.9         | 11.7         | 10.2          | 13.3                      | 9.8         | 101.0        | -0.51 | 0.16  |
| MSB4-5                | 10/21/2004    | 85.5         | 0.9         | 11.1         | 10.0          | 14.0                      | 9.6         | 94.7         | -0.59 | 0.25  |
| MSB4-5                | 11/19/2004    | 89.9         | 0.9         | 11.1         | 10.1          | 13.1                      | 10.0        | 94.4         | -0.55 | 0.04  |
| MSB4-5                | 12/24/2004    | 86.7         | 0.9         | 10.7         | 9.9           | 13.5                      | 9.9         | 98.4         | -0.67 | 0.02  |
| MSB4-5                | 01/25/2005    | 84.7         | 0.9         | 10.3         | 9.3           | 13.0                      | 10.6        | 94.1         | -0.72 | -0.34 |

|        |            |       |     |      |      |      |      |       |       |       |
|--------|------------|-------|-----|------|------|------|------|-------|-------|-------|
| MSB4-5 | 02/15/2005 | 81.2  | 1.2 | 10.0 | 9.2  | 11.6 | 9.6  | 86.9  | -0.15 | -0.04 |
| MSB4-5 | 05/18/2005 | 84.0  | 0.7 | 10.0 | 8.2  | 11.1 | 9.6  | 91.0  | -0.57 | -0.60 |
| MSB4-5 | 08/23/2005 | 83.3  | 0.6 | 8.0  | 9.9  | 11.3 | 10.0 | 68.2  | -1.05 | -0.52 |
| MSB4-5 | 12/01/2005 | 78.0  | 0.4 | 6.9  | 9.0  | 10.7 | 9.9  | 59.7  | -1.28 | -0.87 |
| MSB4-5 | 02/27/2006 | 94.4  | 0.3 | 10.4 | 7.9  | 11.0 | 10.2 | 94.6  | -0.96 | -1.10 |
| MSB4-5 | 06/15/2006 | 73.3  | 0.7 | 7.0  | 9.3  | 10.5 | 10.6 | 64.3  | -1.13 | -0.87 |
| MSB4-5 | 08/10/2006 | 70.8  | 0.6 | 6.6  | 9.7  | 10.2 | 10.6 | 61.6  | -1.32 | -0.92 |
| MSB4-5 | 11/20/2006 | 74.1  | 0.5 | 7.1  | 8.9  | 10.6 | 10.3 | 62.0  | -1.27 | -0.97 |
| MSB4-5 | 02/08/2007 | 76.9  | 0.7 | 8.3  | 7.7  | 10.3 | 10.0 | 75.5  | -0.74 | -0.95 |
| MSB4-5 | 05/14/2007 | 80.4  | 0.7 | 8.7  | 7.7  | 10.2 | 9.6  | 83.0  | -0.57 | -0.83 |
| MSB4-5 | 08/08/2007 | 81.6  | 0.7 | 9.4  | 8.6  | 9.9  | 9.7  | 87.8  | -0.61 | -0.74 |
| MSB4-5 | 11/16/2007 | 89.5  | 1.1 | 11.6 | 7.3  | 9.1  | 8.2  | 113.9 | 0.57  | -0.28 |
| MSB4-5 | 02/07/2008 | 97.4  | 0.9 | 13.7 | 6.2  | 8.0  | 7.5  | 132.6 | 0.84  | -0.49 |
| MSB4-5 | 06/19/2008 | 103.0 | 0.8 | 15.2 | 6.0  | 6.1  | 6.9  | 145.0 | 1.11  | -0.64 |
| MSB4-5 | 08/27/2008 | 78.7  | 0.8 | 13.8 | 4.2  | 4.4  | 5.0  | 116.0 | 1.26  | -0.65 |
| MSB4-5 | 11/14/2008 | 111.0 | 0.8 | 17.4 | 3.9  | 4.2  | 6.7  | 173.0 | 1.71  | -1.14 |
| MSB4-5 | 01/22/2009 | 114.0 | 0.8 | 18.0 | 3.8  | 4.3  | 6.5  | 179.0 | 1.82  | -1.06 |
| MSB4-5 | 07/09/2009 | 119.0 | 0.9 | 19.0 | 5.5  | 4.6  | 7.6  | 190.0 | 1.68  | -0.99 |
| MSB4-5 | 10/16/2009 | 118.0 | 0.9 | 18.0 | 5.0  | 4.2  | 7.4  | 190.0 | 1.77  | -1.08 |
| MSB4-5 | 12/02/2009 | 114.0 | 0.9 | 17.0 | 9.0  | 4.4  | 7.8  | 174.0 | 1.18  | -0.55 |
| MSB4-5 | 01/21/2010 | 121.0 | 0.9 | 19.0 | 5.0  | 4.1  | 7.6  | 190.0 | 1.79  | -1.15 |
| MSB4-5 | 06/29/2010 | 117.0 | 0.9 | 18.0 | 5.2  | 3.7  | 7.9  | 184.0 | 1.64  | -1.28 |
| MSB4-5 | 08/03/2010 | 123.0 | 0.9 | 20.0 | 4.8  | 3.6  | 7.7  | 202.0 | 1.90  | -1.26 |
| MSB4-5 | 10/18/2010 | 125.0 | 1.0 | 20.0 | 5.1  | 3.6  | 7.6  | 203.0 | 2.04  | -1.11 |
| MSB4-5 | 01/13/2011 | 129.0 | 1.0 | 21.0 | 5.3  | 3.2  | 7.4  | 206.0 | 2.17  | -1.05 |
| MSB4-5 | 08/04/2011 | 124.0 | 1.0 | 20.0 | 4.8  | 2.9  | 7.7  | 201.0 | 2.07  | -1.28 |
| MSB4-5 | 10/12/2011 | 125.0 | 1.0 | 20.0 | 4.5  | 2.8  | 7.8  | 200.0 | 2.10  | -1.38 |
| MSB4-5 | 02/15/2012 | 124.0 | 0.9 | 19.0 | 4.3  | 2.8  | 7.8  | 202.0 | 1.98  | -1.48 |
| MSB4-5 | 05/15/2012 | 124.0 | 1.0 | 19.0 | 5.1  | 3.2  | 7.8  | 201.0 | 2.00  | -1.23 |
| MSB4-5 | 06/09/2012 | 125.0 | 1.0 | 20.0 | 4.7  | 2.9  | 7.7  | 202.0 | 2.10  | -1.30 |
| MSB4-5 | 08/29/2012 | 129.0 | 1.0 | 21.0 | 4.1  | 3.0  | 7.8  | 209.0 | 2.23  | -1.40 |
| MSB4-5 | 10/03/2012 | 128.0 | 1.0 | 21.0 | 4.0  | 2.9  | 7.9  | 206.0 | 2.19  | -1.46 |
| MSB4-5 | 12/24/2012 | 128.0 | 1.0 | 21.0 | 4.6  | 2.7  | 7.9  | 205.0 | 2.15  | -1.39 |
| MSB4-5 | 02/08/2013 | 127.0 | 1.0 | 20.0 | 4.3  | 2.8  | 8.1  | 203.0 | 2.10  | -1.50 |
| MSB4-6 | 07/11/2003 | 95.8  | 0.9 | 15.2 | 17.7 | 18.1 | 5.2  | 95.0  | -0.53 | 3.46  |
| MSB4-6 | 08/12/2003 | 93.2  | 1.1 | 17.6 | 14.0 | 9.8  | 5.3  | 104.0 | 0.57  | 1.85  |
| MSB4-6 | 09/11/2003 | 97.0  | 0.9 | 19.6 | 11.5 | 6.8  | 7.7  | 128.0 | 0.41  | 0.17  |
| MSB4-6 | 12/11/2003 | 97.9  | 0.8 | 16.5 | 12.1 | 8.7  | 6.3  | 123.0 | 0.40  | 0.91  |
| MSB4-6 | 01/23/2004 | 93.0  | 0.9 | 16.3 | 12.1 | 9.8  | 5.9  | 127.0 | 0.42  | 1.22  |
| MSB4-6 | 02/13/2004 | 93.2  | 0.8 | 16.1 | 12.4 | 10.1 | 6.0  | 124.0 | 0.27  | 1.21  |
| MSB4-6 | 03/10/2004 | 100.0 | 0.9 | 16.5 | 11.9 | 10.0 | 6.9  | 130.0 | 0.33  | 0.89  |
| MSB4-6 | 04/13/2004 | 101.0 | 0.9 | 16.7 | 11.3 | 10.9 | 6.7  | 139.0 | 0.41  | 0.98  |
| MSB4-6 | 05/11/2004 | 99.4  | 0.8 | 17.0 | 11.7 | 11.0 | 6.4  | 129.0 | 0.35  | 1.15  |
| MSB4-6 | 06/16/2004 | 100.0 | 0.8 | 16.8 | 12.2 | 13.2 | 6.8  | 115.0 | 0.05  | 1.38  |
| MSB4-6 | 07/26/2004 | 97.7  | 0.8 | 15.5 | 11.6 | 0.8  | 11.1 | 90.9  | -0.19 | -1.79 |
| MSB4-6 | 08/17/2004 | 96.6  | 0.8 | 15.7 | 10.4 | 12.0 | 5.3  | 117.0 | 0.49  | 1.36  |
| MSB4-6 | 09/10/2004 | 107.0 | 0.8 | 17.7 | 11.6 | 8.2  | 6.0  | 147.0 | 0.80  | 0.89  |
| MSB4-6 | 10/22/2004 | 108.0 | 0.9 | 17.7 | 10.7 | 8.8  | 5.8  | 144.0 | 0.94  | 0.92  |
| MSB4-6 | 11/19/2004 | 106.0 | 0.9 | 17.9 | 10.6 | 8.9  | 5.7  | 179.0 | 1.03  | 0.94  |
| MSB4-6 | 12/24/2004 | 107.0 | 0.8 | 17.5 | 10.4 | 9.5  | 6.2  | 151.0 | 0.76  | 0.80  |
| MSB4-6 | 01/25/2005 | 102.0 | 0.9 | 16.6 | 9.7  | 10.5 | 6.0  | 150.0 | 0.78  | 0.88  |
| MSB4-6 | 02/15/2005 | 100.7 | 0.2 | 14.5 | 9.8  | 10.0 | 5.6  | 134.3 | 0.00  | 0.50  |
| MSB4-6 | 05/19/2005 | 102.8 | 0.6 | 16.8 | 8.7  | 12.1 | 2.8  | 140.3 | 1.08  | 1.77  |
| MSB4-6 | 08/24/2005 | 118.0 | 0.5 | 17.1 | 9.0  | 11.5 | 5.7  | 138.3 | 0.62  | 0.79  |
| MSB4-6 | 12/01/2005 | 113.8 | 0.4 | 16.6 | 8.2  | 10.9 | 5.8  | 141.1 | 0.54  | 0.47  |
| MSB4-6 | 02/27/2006 | 115.3 | 0.3 | 17.1 | 8.2  | 10.0 | 6.0  | 144.1 | 0.47  | 0.23  |
| MSB4-6 | 06/14/2006 | 106.3 | 0.9 | 16.6 | 8.5  | 10.5 | 6.0  | 148.5 | 1.00  | 0.74  |
| MSB4-6 | 08/09/2006 | 106.5 | 0.7 | 16.2 | 8.1  | 10.3 | 6.1  | 145.8 | 0.78  | 0.47  |
| MSB4-6 | 11/20/2006 | 107.3 | 0.5 | 16.2 | 7.9  | 9.7  | 5.8  | 143.8 | 0.66  | 0.32  |
| MSB4-6 | 02/13/2007 | 109.4 | 0.5 | 16.2 | 8.0  | 9.1  | 6.4  | 150.8 | 0.63  | 0.07  |

|        |            |       |     |      |      |      |      |       |       |       |
|--------|------------|-------|-----|------|------|------|------|-------|-------|-------|
| MSB4-6 | 05/15/2007 | 105.7 | 0.8 | 16.0 | 7.8  | 8.0  | 6.3  | 142.0 | 0.99  | 0.11  |
| MSB4-6 | 08/08/2007 | 107.0 | 0.7 | 16.5 | 8.5  | 8.3  | 6.5  | 144.6 | 0.79  | 0.14  |
| MSB4-6 | 11/20/2007 | 97.8  | 1.1 | 16.0 | 8.0  | 8.2  | 6.4  | 141.4 | 1.18  | 0.33  |
| MSB4-6 | 02/08/2008 | 108.0 | 0.9 | 16.1 | 8.0  | 8.0  | 6.6  | 145.7 | 1.09  | 0.12  |
| MSB4-6 | 06/19/2008 | 99.3  | 0.9 | 15.5 | 8.6  | 6.4  | 6.4  | 134.0 | 0.98  | 0.04  |
| MSB4-6 | 08/28/2008 | 83.6  | 0.6 | 12.8 | 7.6  | 5.2  | 5.0  | 103.0 | 0.68  | -0.13 |
| MSB4-6 | 11/14/2008 | 105.0 | 0.2 | 14.8 | 7.5  | 7.0  | 6.9  | 149.0 | 0.25  | -0.67 |
| MSB4-6 | 01/23/2009 | 95.7  | 0.8 | 14.6 | 7.0  | 6.6  | 6.2  | 140.0 | 1.00  | -0.21 |
| MSB4-6 | 07/08/2009 | 114.0 | 0.7 | 19.0 | 6.4  | 9.0  | 7.6  | 174.0 | 0.97  | -0.41 |
| MSB4-6 | 12/03/2009 | 120.0 | 0.7 | 20.0 | 5.9  | 5.7  | 7.7  | 186.0 | 1.33  | -0.94 |
| MSB4-6 | 01/22/2010 | 120.0 | 0.7 | 21.0 | 5.3  | 5.3  | 8.2  | 189.0 | 1.33  | -1.24 |
| MSB4-6 | 06/30/2010 | 124.0 | 0.7 | 22.0 | 5.3  | 4.6  | 8.6  | 200.0 | 1.41  | -1.44 |
| MSB4-6 | 08/05/2010 | 122.0 | 0.7 | 21.0 | 5.4  | 4.6  | 8.6  | 200.0 | 1.36  | -1.44 |
| MSB4-7 | 07/11/2003 | 83.4  | 1.0 | 16.3 | 11.5 | 1.2  | 11.6 | 98.1  | -0.32 | -1.83 |
| MSB4-7 | 08/12/2003 | 78.8  | 1.2 | 17.8 | 12.4 | 0.9  | 11.7 | 94.4  | -0.21 | -1.61 |
| MSB4-7 | 09/11/2003 | 78.1  | 0.9 | 16.5 | 12.2 | 0.9  | 11.7 | 85.1  | -0.56 | -1.84 |
| MSB4-7 | 12/11/2003 | 74.6  | 0.9 | 16.3 | 11.4 | 0.8  | 10.9 | 99.4  | -0.28 | -1.71 |
| MSB4-7 | 01/23/2004 | 74.1  | 1.0 | 16.3 | 11.7 | 0.6  | 11.1 | 96.0  | -0.28 | -1.70 |
| MSB4-7 | 02/13/2004 | 71.9  | 1.0 | 16.3 | 11.5 | 0.8  | 10.8 | 95.9  | -0.26 | -1.63 |
| MSB4-7 | 03/10/2004 | 78.0  | 0.7 | 12.9 | 9.0  | 2.0  | 12.7 | 83.6  | -0.86 | -2.72 |
| MSB4-7 | 04/13/2004 | 76.4  | 0.8 | 14.1 | 9.6  | 1.6  | 13.0 | 91.0  | -0.81 | -2.68 |
| MSB4-7 | 05/11/2004 | 74.7  | 0.8 | 14.7 | 9.9  | 1.3  | 12.1 | 92.3  | -0.64 | -2.39 |
| MSB4-7 | 06/16/2004 | 76.8  | 0.8 | 15.3 | 10.8 | 1.3  | 13.4 | 79.8  | -0.96 | -2.62 |
| MSB4-7 | 07/26/2004 | 75.9  | 0.9 | 15.0 | 10.4 | 11.1 | 6.9  | 125.0 | 0.01  | 0.76  |
| MSB4-7 | 08/17/2004 | 73.0  | 0.8 | 14.8 | 10.1 | 1.0  | 11.1 | 89.2  | -0.43 | -2.06 |
| MSB4-7 | 09/10/2004 | 84.8  | 0.6 | 12.8 | 9.6  | 2.1  | 12.0 | 92.6  | -0.71 | -2.41 |
| MSB4-7 | 10/22/2004 | 83.3  | 0.8 | 13.3 | 9.3  | 1.7  | 11.5 | 93.1  | -0.40 | -2.25 |
| MSB4-7 | 11/19/2004 | 81.2  | 0.7 | 13.7 | 9.7  | 1.4  | 11.6 | 94.3  | -0.51 | -2.28 |
| MSB4-7 | 12/24/2004 | 79.6  | 0.7 | 14.0 | 9.6  | 1.3  | 11.8 | 94.1  | -0.55 | -2.37 |
| MSB4-7 | 01/25/2005 | 75.7  | 0.8 | 13.4 | 9.4  | 1.2  | 12.1 | 93.8  | -0.58 | -2.48 |
| MSB4-7 | 02/15/2005 | 73.0  | 1.0 | 13.4 | 9.4  | 1.3  | 11.3 | 87.3  | -0.24 | -2.08 |
| MSB4-7 | 05/19/2005 | 75.0  | 0.6 | 14.1 | 8.8  | 0.6  | 8.2  | 92.0  | 0.05  | -1.57 |
| MSB4-7 | 08/25/2005 | 85.4  | 0.5 | 14.5 | 8.9  | 0.5  | 12.3 | 92.8  | -0.72 | -2.89 |
| MSB4-7 | 12/02/2005 | 84.0  | 0.4 | 13.8 | 8.3  | 0.4  | 11.0 | 91.8  | -0.55 | -2.67 |
| MSB4-7 | 02/28/2006 | 83.9  | 0.2 | 13.9 | 8.2  | 0.4  | 10.8 | 91.6  | -0.74 | -2.76 |
| MSB4-7 | 06/13/2006 | 75.6  | 0.7 | 13.6 | 8.8  | 0.4  | 11.5 | 89.1  | -0.48 | -2.56 |
| MSB4-7 | 08/08/2006 | 75.7  | 0.7 | 13.4 | 8.6  | 0.6  | 11.8 | 89.8  | -0.53 | -2.66 |
| MSB4-7 | 11/21/2006 | 76.6  | 0.6 | 13.6 | 8.2  | 0.8  | 11.4 | 86.8  | -0.54 | -2.64 |
| MSB4-7 | 02/14/2007 | 77.0  | 0.4 | 14.0 | 8.1  | 0.6  | 11.4 | 91.5  | -0.73 | -2.81 |
| MSB4-7 | 05/16/2007 | 74.3  | 0.6 | 13.7 | 8.8  | 0.7  | 11.6 | 88.3  | -0.66 | -2.62 |
| MSB4-7 | 08/09/2007 | 76.3  | 0.7 | 14.1 | 8.8  | 0.9  | 11.7 | 88.2  | -0.53 | -2.55 |
| MSB4-7 | 11/21/2007 | 70.2  | 0.8 | 13.6 | 8.5  | 0.8  | 10.9 | 88.6  | -0.32 | -2.31 |
| MSB4-7 | 02/14/2008 | 75.3  | 0.5 | 13.4 | 8.6  | 0.6  | 11.2 | 88.1  | -0.66 | -2.61 |
| MSB4-7 | 06/20/2008 | 73.5  | 0.6 | 13.3 | 8.7  | 1.6  | 11.0 | 83.9  | -0.61 | -2.33 |
| MSB4-7 | 08/28/2008 | 60.7  | 0.6 | 11.3 | 7.7  | 1.2  | 8.1  | 66.1  | -0.21 | -1.70 |
| MSB4-7 | 11/17/2008 | 75.0  | 0.2 | 13.7 | 8.4  | 0.5  | 11.5 | 90.7  | -1.04 | -2.95 |
| MSB4-7 | 01/23/2009 | 66.0  | 0.7 | 11.8 | 8.1  | 1.2  | 10.0 | 79.1  | -0.37 | -2.13 |
| MSB4-7 | 07/09/2009 | 72.0  | 0.5 | 12.0 | 9.1  | 2.3  | 13.0 | 80.0  | -1.25 | -2.87 |
| MSB4-7 | 10/15/2009 | 71.0  | 0.5 | 12.0 | 8.4  | 2.5  | 12.0 | 80.0  | -1.02 | -2.65 |
| MSB4-7 | 12/01/2009 | 73.0  | 0.5 | 12.0 | 5.9  | 2.5  | 12.0 | 81.0  | -0.75 | -3.06 |
| MSB4-7 | 01/20/2010 | 74.0  | 0.5 | 13.0 | 8.3  | 2.6  | 12.0 | 83.0  | -0.95 | -2.64 |
| MSB4-7 | 06/28/2010 | 76.0  | 0.6 | 14.0 | 8.5  | 1.7  | 12.0 | 91.0  | -0.72 | -2.65 |
| MSB4-7 | 08/04/2010 | 75.0  | 0.5 | 13.0 | 8.7  | 1.9  | 12.0 | 91.0  | -0.90 | -2.67 |
| MSB4-7 | 08/05/2011 | 71.0  | 0.7 | 14.0 | 11.0 | 3.4  | 12.0 | 77.0  | -1.06 | -1.96 |
| MSB4-7 | 10/13/2011 | 73.0  | 0.6 | 14.0 | 11.0 | 2.9  | 12.0 | 80.0  | -1.11 | -2.09 |
| MSB4-7 | 12/17/2011 | 74.0  | 0.5 | 13.0 | 10.0 | 2.2  | 12.0 | 82.0  | -1.09 | -2.42 |
| MSB4-7 | 02/14/2012 | 73.0  | 0.6 | 13.0 | 10.0 | 1.8  | 12.0 | 80.0  | -0.97 | -2.41 |
| MSB4-7 | 05/15/2012 | 73.0  | 0.6 | 13.0 | 10.0 | 2.2  | 12.0 | 82.0  | -0.98 | -2.35 |
| MSB4-7 | 06/11/2012 | 73.0  | 0.6 | 13.0 | 9.8  | 2.1  | 12.0 | 80.0  | -0.96 | -2.40 |
| MSB4-7 | 08/29/2012 | 73.0  | 0.7 | 14.0 | 10.0 | 2.3  | 12.0 | 80.0  | -0.87 | -2.27 |

|           |            |       |     |       |      |      |      |        |       |       |
|-----------|------------|-------|-----|-------|------|------|------|--------|-------|-------|
| MSB4-7    | 10/04/2012 | 72.0  | 0.6 | 13.0  | 9.8  | 2.2  | 12.0 | 78.0   | -0.99 | -2.39 |
| MSB4-7    | 12/21/2012 | 72.0  | 0.7 | 13.0  | 11.0 | 2.2  | 12.0 | 77.0   | -0.99 | -2.13 |
| MSB4-7    | 02/11/2013 | 72.0  | 0.7 | 13.0  | 10.0 | 2.2  | 12.0 | 76.0   | -0.90 | -2.29 |
| MIZ-1-115 | 04/20/2003 | 58.7  | 0.3 | 5.9   | 9.6  | 6.8  | 8.7  | 37.5   | -1.38 | -1.06 |
| MIZ-1-220 | 07/09/2003 | 68.1  | 0.9 | 11.1  | 6.6  | 8.4  | 11.9 | 85.3   | -0.73 | -1.84 |
| MIZ-1-650 | 07/25/2008 | 217.0 | 1.8 | 174.0 | 3.5  | 0.5  | 5.4  | 615.0  | 8.33  | 0.73  |
| MIZ-1-115 | 07/15/2008 | 435.0 | 3.7 | 644.0 | 3.4  | 0.0  | 3.2  | 1830.0 | 23.91 | 6.42  |
| MIZ-1-115 | 09/17/2009 | 434.0 | 3.3 | 648.9 | 2.3  | 0.1  | 3.1  | 1890.0 | 23.86 | 6.12  |
| MIZ-1-115 | 11/07/2011 | 441.0 | 3.4 | 640.0 | 1.9  | 0.0  | 3.0  | 1820.0 | 23.74 | 6.02  |
| MIZ-1-115 | 09/28/2012 | 438.0 | 3.4 | 643.0 | 1.7  | 0.0  | 3.1  | 1830.0 | 23.76 | 5.97  |
| 07MI07-1  | 10/15/2007 | 83.7  | 0.6 | 13.1  | 14.0 | 12.4 | 8.4  | 83.2   | -1.07 | 0.84  |
| 07MI07-1  | 10/25/2007 | 83.8  | 0.6 | 12.9  | 13.8 | 12.5 | 8.3  | 82.9   | -1.04 | 0.85  |
| 07MI07-1  | 11/05/2007 | 80.3  | 0.6 | 11.4  | 14.4 | 12.4 | 8.3  | 72.6   | -1.19 | 0.92  |
| 07MI07-1  | 11/07/2007 | 80.3  | 0.3 | 11.9  | 14.0 | 12.4 | 8.8  | 74.7   | -1.60 | 0.50  |
| 07MI07-1  | 11/13/2007 | 79.4  | 0.6 | 11.8  | 14.2 | 12.8 | 8.2  | 72.2   | -1.19 | 0.97  |
| 07MI07-1  | 11/14/2007 | 75.0  | 0.7 | 10.5  | 14.3 | 12.6 | 8.5  | 64.6   | -1.24 | 0.91  |
| 07MI07-1  | 11/16/2007 | 76.0  | 0.7 | 10.6  | 14.8 | 13.7 | 8.4  | 62.5   | -1.32 | 1.18  |
| 07MI07-1  | 11/19/2007 | 71.1  | 0.6 | 10.4  | 14.7 | 13.5 | 8.5  | 60.7   | -1.52 | 1.02  |
| 07MI07-1  | 11/22/2007 | 73.3  | 1.0 | 10.5  | 15.1 | 12.8 | 8.7  | 59.4   | -1.05 | 1.21  |
| 07MI07-1  | 12/04/2007 | 75.9  | 0.4 | 10.6  | 14.9 | 12.6 | 8.4  | 62.9   | -1.62 | 0.84  |
| 07MI07-1  | 12/17/2007 | 71.4  | 0.3 | 10.8  | 14.7 | 12.6 | 8.6  | 65.6   | -1.82 | 0.67  |
| 07MI07-1  | 01/08/2008 | 83.2  | 0.6 | 12.9  | 13.6 | 11.8 | 8.2  | 84.8   | -0.96 | 0.76  |
| 07MI07-1  | 01/08/2008 | 83.5  | 0.6 | 12.7  | 14.7 | 12.6 | 8.1  | 80.3   | -1.10 | 1.07  |
| 07MI07-1  | 01/21/2008 | 80.9  | 0.6 | 11.7  | 14.0 | 11.9 | 8.1  | 78.0   | -1.06 | 0.85  |
| 07MI07-1  | 01/28/2008 | 82.0  | 0.4 | 12.6  | 13.6 | 11.8 | 8.0  | 84.9   | -1.18 | 0.68  |
| 07MI07-1  | 02/11/2008 | 88.5  | 0.8 | 13.7  | 13.5 | 11.9 | 7.9  | 89.7   | -0.55 | 1.00  |
| 07MI07-1  | 02/19/2008 | 86.5  | 0.4 | 14.0  | 13.1 | 12.4 | 8.1  | 96.0   | -1.06 | 0.67  |
| 07MI07-1  | 02/25/2008 | 86.8  | 0.5 | 16.9  | 12.9 | 11.8 | 7.5  | 102.9  | -0.71 | 0.83  |
| 07MI07-1  | 02/29/2008 | 81.0  | 0.2 | 8.0   | 13.0 | 11.4 | 7.9  | 84.6   | -1.38 | 0.39  |
| 07MI07-1  | 03/26/2008 | 91.4  | 0.7 | 16.1  | 12.7 | 11.7 | 7.7  | 110.0  | -0.40 | 0.87  |
| 07MI07-1  | 05/13/2008 | 95.3  | 0.8 | 18.0  | 11.7 | 10.7 | 7.4  | 122.0  | 0.05  | 0.75  |
| 07MI07-1  | 06/25/2008 | 98.8  | 0.7 | 19.2  | 11.3 | 10.0 | 3.1  | 132.0  | 0.95  | 1.88  |
| 07MI07-1  | 07/17/2008 | 102.0 | 0.5 | 19.5  | 11.1 | 10.3 | 7.2  | 138.0  | -0.01 | 0.49  |
| 07MI07-1  | 08/19/2008 | 86.6  | 0.5 | 17.5  | 10.9 | 9.6  | 5.9  | 117.0  | -0.03 | 0.71  |
| 07MI07-1  | 09/08/2008 | 95.8  | 0.6 | 19.6  | 11.0 | 11.3 | 7.5  | 131.0  | -0.12 | 0.57  |
| 07MI07-1  | 10/22/2008 | 87.6  | 0.6 | 17.2  | 11.3 | 9.6  | 8.7  | 118.0  | -0.48 | -0.02 |
| 07MI07-1  | 11/04/2008 | 102.0 | 0.5 | 17.4  | 11.6 | 10.2 | 7.4  | 132.0  | -0.14 | 0.48  |
| 07MI07-1  | 12/08/2008 | 92.6  | 0.5 | 16.0  | 12.3 | 11.0 | 7.4  | 110.0  | -0.49 | 0.67  |
| 07MI07-1  | 01/22/2009 | 88.8  | 0.4 | 15.6  | 12.5 | 11.4 | 7.4  | 103.0  | -0.73 | 0.67  |
| 07MI07-1  | 02/16/2009 | 84.7  | 0.2 | 13.9  | 13.6 | 12.7 | 7.8  | 94.2   | -1.34 | 0.75  |
| 07MI07-1  | 03/20/2009 | 91.1  | 0.5 | 15.4  | 13.2 | 12.5 | 8.0  | 103.2  | -0.86 | 0.80  |
| 07MI07-1  | 04/14/2009 | 93.9  | 0.5 | 14.8  | 13.3 | 22.1 | 8.3  | 101.6  | -1.45 | 2.03  |
| 07MI07-1  | 06/01/2009 | 92.5  | 0.5 | 15.4  | 12.8 | 16.6 | 8.3  | 105.9  | -1.09 | 1.21  |
| 07MI07-1  | 06/27/2009 | 96.2  | 0.5 | 15.5  | 13.0 | 20.9 | 8.2  | 106.0  | -1.29 | 1.86  |
| 07MI07-1  | 07/20/2009 | 96.4  | 0.5 | 16.4  | 13.8 | 13.8 | 8.7  | 114.9  | -0.99 | 0.88  |
| 07MI07-1  | 08/17/2009 | 97.1  | 0.5 | 18.4  | 11.9 | 13.3 | 8.3  | 122.9  | -0.64 | 0.64  |
| 07MI07-1  | 09/24/2009 | 84.0  | 0.4 | 13.0  | 14.4 | 15.0 | 8.6  | 80.0   | -1.54 | 1.06  |
| 07MI07-1  | 10/28/2009 | 80.0  | 0.4 | 12.0  | 15.5 | 15.0 | 8.4  | 71.0   | -1.70 | 1.28  |
| 07MI07-1  | 11/23/2009 | 79.0  | 0.4 | 11.0  | 14.2 | 16.0 | 8.6  | 65.0   | -1.73 | 1.14  |
| 07MI07-1  | 12/22/2009 | 77.0  | 0.4 | 11.0  | 14.5 | 16.0 | 8.8  | 60.0   | -1.85 | 1.12  |
| 07MI07-1  | 01/25/2010 | 74.0  | 0.4 | 10.0  | 15.5 | 16.0 | 9.1  | 51.0   | -2.09 | 1.17  |
| 07MI07-1  | 02/09/2010 | 74.0  | 0.4 | 10.0  | 15.0 | 16.0 | 9.1  | 52.0   | -2.04 | 1.09  |
| 07MI07-1  | 04/21/2010 | 72.0  | 0.3 | 9.4   | 16.0 | 16.0 | 8.9  | 48.0   | -2.26 | 1.24  |
| 07MI07-1  | 06/24/2010 | 71.0  | 0.3 | 9.1   | 16.0 | 16.0 | 9.3  | 48.0   | -2.36 | 1.11  |
| 07MI07-1  | 08/12/2010 | 70.0  | 0.3 | 9.0   | 17.0 | 16.0 | 9.6  | 46.0   | -2.53 | 1.18  |
| 07MI07-1  | 10/04/2010 | 70.0  | 0.3 | 8.8   | 17.0 | 15.0 | 9.2  | 45.0   | -2.40 | 1.16  |
| 07MI07-1  | 12/28/2010 | 70.0  | 0.3 | 8.7   | 18.0 | 15.0 | 8.8  | 46.0   | -2.42 | 1.45  |
| 07MI07-1  | 02/03/2011 | 70.0  | 0.3 | 8.7   | 17.0 | 15.0 | 8.9  | 45.0   | -2.35 | 1.26  |
| 07MI07-1  | 04/08/2011 | 70.0  | 0.4 | 8.4   | 17.0 | 16.0 | 8.7  | 46.0   | -2.25 | 1.52  |
| 07MI07-1  | 07/01/2011 | 70.0  | 0.3 | 8.2   | 17.0 | 17.0 | 8.4  | 45.0   | -2.37 | 1.68  |

|          |            |       |     |      |      |      |     |       |       |       |
|----------|------------|-------|-----|------|------|------|-----|-------|-------|-------|
| 07MI07-1 | 08/12/2011 | 71.0  | 0.3 | 8.3  | 17.0 | 17.0 | 8.6 | 46.0  | -2.39 | 1.62  |
| 07MI07-1 | 10/17/2011 | 70.0  | 0.3 | 7.9  | 17.0 | 17.0 | 8.5 | 45.0  | -2.39 | 1.65  |
| 07MI07-1 | 12/12/2011 | 73.0  | 0.3 | 8.3  | 17.0 | 16.0 | 8.2 | 47.0  | -2.22 | 1.61  |
| 07MI07-1 | 02/23/2012 | 74.0  | 0.3 | 8.8  | 16.0 | 16.0 | 8.3 | 49.0  | -2.12 | 1.43  |
| 07MI07-1 | 05/08/2012 | 74.0  | 0.3 | 8.8  | 16.0 | 17.0 | 8.4 | 50.0  | -2.19 | 1.53  |
| 07MI07-1 | 06/11/2012 | 74.0  | 0.4 | 8.9  | 15.0 | 17.0 | 8.5 | 48.0  | -2.01 | 1.40  |
| 07MI07-1 | 08/28/2012 | 73.0  | 0.3 | 8.8  | 16.0 | 17.0 | 8.7 | 49.0  | -2.27 | 1.44  |
| 07MI07-1 | 10/18/2012 | 72.0  | 0.3 | 8.6  | 16.0 | 17.0 | 8.8 | 44.0  | -2.32 | 1.40  |
| 07MI07-1 | 12/10/2012 | 74.0  | 0.3 | 8.9  | 15.0 | 15.0 | 8.8 | 50.0  | -2.06 | 0.97  |
| 07MI07-1 | 02/20/2013 | 72.0  | 0.3 | 8.6  | 15.0 | 15.0 | 9.1 | 48.0  | -2.16 | 0.87  |
| 07MI07-1 | 03/11/2013 | 72.0  | 0.3 | 8.5  | 15.0 | 15.0 | 9.1 | 48.0  | -2.16 | 0.87  |
| 07MI07-1 | 06/17/2013 | 70.0  | 0.3 | 8.3  | 15.0 | 15.0 | 9.3 | 49.0  | -2.23 | 0.80  |
| 07MI07-1 | 09/26/2013 | 68.0  | 0.3 | 7.8  | 16.0 | 14.0 | 9.4 | 46.0  | -2.33 | 0.79  |
| 07MI07-1 | 11/18/2013 | 69.0  | 0.3 | 8.1  | 13.0 | 14.0 | 9.5 | 46.0  | -2.05 | 0.27  |
| 07MI07-1 | 02/20/2014 | 67.0  | 0.3 | 8.0  | 15.0 | 15.0 | 9.6 | 44.0  | -2.35 | 0.70  |
| 07MI07-2 | 10/15/2007 | 105.4 | 0.7 | 19.8 | 11.1 | 9.2  | 8.0 | 144.0 | 0.21  | 0.24  |
| 07MI07-2 | 10/25/2007 | 95.4  | 0.7 | 16.9 | 12.3 | 10.7 | 8.0 | 112.9 | -0.29 | 0.59  |
| 07MI07-2 | 11/05/2007 | 90.4  | 0.6 | 15.0 | 12.9 | 11.0 | 8.0 | 99.3  | -0.62 | 0.63  |
| 07MI07-2 | 11/07/2007 | 95.4  | 0.4 | 16.1 | 11.5 | 10.3 | 8.5 | 116.6 | -0.64 | 0.04  |
| 07MI07-2 | 11/13/2007 | 86.5  | 0.5 | 13.7 | 12.8 | 11.8 | 8.3 | 90.8  | -0.94 | 0.54  |
| 07MI07-2 | 11/14/2007 | 84.0  | 0.8 | 13.3 | 13.0 | 12.8 | 8.4 | 87.0  | -0.74 | 0.87  |
| 07MI07-2 | 11/16/2007 | 82.1  | 0.8 | 12.7 | 13.9 | 12.0 | 8.3 | 79.9  | -0.82 | 0.93  |
| 07MI07-2 | 11/19/2007 | 77.5  | 0.7 | 12.6 | 13.7 | 12.4 | 8.4 | 79.1  | -1.03 | 0.84  |
| 07MI07-2 | 11/23/2007 | 82.7  | 0.7 | 13.4 | 12.6 | 11.3 | 8.5 | 88.6  | -0.77 | 0.50  |
| 07MI07-2 | 12/05/2007 | 85.9  | 0.5 | 13.8 | 12.7 | 11.1 | 8.6 | 90.2  | -0.96 | 0.33  |
| 07MI07-2 | 12/19/2007 | 80.1  | 0.3 | 12.9 | 13.2 | 12.0 | 8.2 | 88.2  | -1.32 | 0.51  |
| 07MI07-2 | 01/09/2008 | 101.0 | 0.7 | 19.1 | 11.3 | 8.9  | 7.8 | 135.3 | 0.14  | 0.28  |
| 07MI07-2 | 01/16/2008 | 98.0  | 0.9 | 17.2 | 12.3 | 10.4 | 7.7 | 115.6 | 0.08  | 0.78  |
| 07MI07-2 | 01/22/2008 | 91.9  | 0.8 | 16.6 | 12.2 | 10.3 | 7.8 | 116.3 | -0.14 | 0.64  |
| 07MI07-2 | 01/29/2008 | 96.3  | 0.5 | 16.8 | 11.2 | 9.5  | 7.7 | 124.8 | -0.24 | 0.21  |
| 07MI07-2 | 02/04/2008 | 97.2  | 0.5 | 17.4 | 11.9 | 10.2 | 7.7 | 121.4 | -0.33 | 0.42  |
| 07MI07-2 | 02/12/2008 | 106.4 | 0.7 | 19.3 | 10.5 | 9.4  | 7.8 | 137.5 | 0.28  | 0.22  |
| 07MI07-2 | 02/20/2008 | 98.5  | 0.4 | 18.1 | 10.6 | 9.9  | 7.8 | 134.2 | -0.26 | 0.08  |
| 07MI07-2 | 02/29/2008 | 95.5  | 0.6 | 17.6 | 11.2 | 8.5  | 7.3 | 128.0 | 0.03  | 0.27  |
| 07MI07-2 | 03/26/2008 | 90.2  | 0.6 | 19.5 | 12.5 | 11.3 | 7.6 | 113.0 | -0.43 | 0.76  |
| 07MI07-2 | 05/13/2008 | 119.0 | 0.8 | 26.5 | 8.1  | 7.3  | 7.3 | 189.0 | 1.30  | -0.13 |
| 07MI07-2 | 06/25/2008 | 127.0 | 0.9 | 29.3 | 7.7  | 6.1  | 7.1 | 211.0 | 1.80  | -0.19 |
| 07MI07-2 | 07/17/2008 | 127.0 | 0.6 | 30.5 | 7.4  | 6.4  | 6.9 | 207.0 | 1.49  | -0.33 |
| 07MI07-2 | 08/19/2008 | 109.0 | 0.6 | 28.4 | 7.2  | 5.3  | 5.7 | 188.0 | 1.44  | -0.20 |
| 07MI07-2 | 09/08/2008 | 124.0 | 0.7 | 33.4 | 6.8  | 5.4  | 7.0 | 221.0 | 1.74  | -0.51 |
| 07MI07-2 | 10/22/2008 | 86.9  | 0.8 | 17.3 | 11.2 | 9.2  | 8.5 | 117.0 | -0.18 | 0.10  |
| 07MI07-2 | 11/04/2008 | 102.0 | 0.5 | 18.4 | 11.5 | 10.6 | 7.5 | 133.0 | -0.15 | 0.50  |
| 07MI07-2 | 12/08/2008 | 108.0 | 0.5 | 20.4 | 11.6 | 10.3 | 7.1 | 152.0 | 0.12  | 0.63  |
| 07MI07-2 | 01/22/2009 | 113.0 | 0.5 | 23.8 | 8.6  | 7.1  | 7.0 | 174.0 | 0.79  | -0.23 |
| 07MI07-2 | 02/13/2009 | 104.0 | 0.2 | 25.5 | 10.8 | 10.3 | 7.1 | 150.0 | -0.18 | 0.31  |
| 07MI07-2 | 03/20/2009 | 111.4 | 0.6 | 23.1 | 10.6 | 8.8  | 7.6 | 166.2 | 0.42  | 0.18  |
| 07MI07-2 | 04/14/2009 | 112.7 | 0.6 | 23.3 | 10.1 | 12.6 | 7.9 | 166.6 | 0.22  | 0.55  |
| 07MI07-2 | 06/01/2009 | 111.5 | 0.6 | 23.5 | 9.5  | 10.5 | 7.8 | 170.1 | 0.41  | 0.17  |
| 07MI07-2 | 06/27/2009 | 119.0 | 0.6 | 28.0 | 9.9  | 12.0 | 7.3 | 187.0 | 0.63  | 0.68  |
| 07MI07-2 | 07/20/2009 | 117.4 | 0.6 | 24.7 | 10.4 | 10.6 | 8.2 | 180.4 | 0.39  | 0.24  |
| 07MI07-2 | 08/17/2009 | 108.6 | 0.5 | 21.8 | 9.6  | 10.2 | 8.2 | 160.2 | 0.20  | -0.03 |
| 07MI07-2 | 09/24/2009 | 98.0  | 0.5 | 17.0 | 11.4 | 11.0 | 8.0 | 119.0 | -0.40 | 0.36  |
| 07MI07-2 | 10/28/2009 | 93.0  | 0.5 | 16.0 | 13.2 | 13.0 | 8.3 | 104.0 | -0.88 | 0.80  |
| 07MI07-2 | 11/23/2009 | 88.0  | 0.4 | 14.0 | 12.7 | 14.0 | 8.6 | 91.0  | -1.21 | 0.67  |
| 07MI07-2 | 12/22/2009 | 83.0  | 0.4 | 13.0 | 13.7 | 15.0 | 8.9 | 75.0  | -1.57 | 0.85  |
| 07MI07-2 | 01/25/2010 | 75.0  | 0.4 | 11.0 | 13.2 | 16.0 | 9.3 | 57.0  | -1.87 | 0.75  |
| 07MI07-2 | 02/15/2010 | 73.0  | 0.4 | 9.8  | 14.0 | 17.0 | 9.0 | 51.0  | -2.00 | 1.09  |
| 07MI07-2 | 04/21/2010 | 81.0  | 0.4 | 12.0 | 14.0 | 14.0 | 9.0 | 78.0  | -1.59 | 0.72  |
| 07MI07-2 | 06/24/2010 | 79.0  | 0.4 | 11.0 | 14.0 | 13.0 | 9.4 | 70.0  | -1.68 | 0.45  |
| 07MI07-2 | 08/12/2010 | 79.0  | 0.4 | 11.0 | 14.0 | 13.0 | 9.8 | 73.0  | -1.75 | 0.33  |

|          |            |       |     |      |      |      |     |       |       |       |
|----------|------------|-------|-----|------|------|------|-----|-------|-------|-------|
| 07MI07-2 | 10/04/2010 | 79.0  | 0.4 | 11.0 | 14.0 | 13.0 | 9.3 | 72.0  | -1.65 | 0.48  |
| 07MI07-2 | 12/28/2010 | 76.0  | 0.4 | 10.0 | 16.0 | 13.0 | 8.9 | 60.0  | -1.86 | 0.91  |
| 07MI07-2 | 02/03/2011 | 72.0  | 0.4 | 9.5  | 16.0 | 15.0 | 8.8 | 49.0  | -2.06 | 1.20  |
| 07MI07-2 | 04/08/2011 | 80.0  | 0.4 | 11.0 | 14.0 | 13.0 | 9.0 | 71.0  | -1.58 | 0.57  |
| 07MI07-2 | 07/01/2011 | 78.0  | 0.4 | 11.0 | 14.0 | 14.0 | 8.8 | 67.0  | -1.64 | 0.77  |
| 07MI07-2 | 08/12/2011 | 82.0  | 0.4 | 11.0 | 14.0 | 13.0 | 8.9 | 77.0  | -1.51 | 0.61  |
| 07MI07-2 | 10/17/2011 | 80.0  | 0.4 | 11.0 | 14.0 | 14.0 | 8.8 | 72.0  | -1.60 | 0.78  |
| 07MI07-2 | 12/12/2011 | 84.0  | 0.4 | 12.0 | 14.0 | 13.0 | 8.5 | 79.0  | -1.38 | 0.75  |
| 07MI07-2 | 02/23/2012 | 85.0  | 0.4 | 13.0 | 13.0 | 12.0 | 8.7 | 88.0  | -1.21 | 0.40  |
| 07MI07-2 | 05/08/2012 | 85.0  | 0.4 | 12.0 | 13.0 | 13.0 | 8.8 | 84.0  | -1.31 | 0.50  |
| 07MI07-2 | 06/11/2012 | 87.0  | 0.4 | 13.0 | 12.0 | 13.0 | 8.8 | 91.0  | -1.15 | 0.35  |
| 07MI07-2 | 08/28/2012 | 87.0  | 0.4 | 13.0 | 12.0 | 12.0 | 9.0 | 91.0  | -1.14 | 0.15  |
| 07MI07-2 | 10/18/2012 | 79.0  | 0.4 | 10.0 | 14.0 | 15.0 | 9.1 | 65.0  | -1.76 | 0.81  |
| 07MI07-2 | 12/10/2012 | 86.0  | 0.4 | 13.0 | 12.0 | 12.0 | 9.0 | 89.0  | -1.16 | 0.14  |
| 07MI07-2 | 02/20/2013 | 94.0  | 0.4 | 15.0 | 10.0 | 8.5  | 9.1 | 115.0 | -0.55 | -0.65 |
| 07MI07-2 | 03/11/2013 | 75.0  | 0.3 | 9.9  | 15.0 | 14.0 | 9.1 | 59.0  | -2.00 | 0.75  |
| 07MI07-2 | 06/17/2013 | 96.0  | 0.5 | 15.0 | 9.3  | 7.5  | 9.4 | 125.0 | -0.30 | -0.92 |
| 07MI07-2 | 09/26/2013 | 79.0  | 0.3 | 10.0 | 13.0 | 12.0 | 9.6 | 76.0  | -1.67 | 0.02  |
| 07MI07-2 | 11/18/2013 | 73.0  | 0.3 | 9.2  | 13.0 | 13.0 | 9.6 | 56.0  | -1.91 | 0.12  |
| 07MI07-2 | 02/20/2014 | 69.0  | 0.3 | 8.3  | 14.0 | 13.0 | 9.7 | 49.0  | -2.11 | 0.24  |
| 07MI07-3 | 10/15/2007 | 112.9 | 0.8 | 22.4 | 9.1  | 7.3  | 8.0 | 167.3 | 0.85  | -0.24 |
| 07MI07-3 | 10/25/2007 | 111.6 | 0.8 | 23.1 | 9.0  | 7.4  | 7.9 | 164.4 | 0.85  | -0.21 |
| 07MI07-3 | 11/05/2007 | 102.4 | 0.7 | 18.7 | 10.3 | 8.2  | 8.1 | 134.5 | 0.23  | -0.08 |
| 07MI07-3 | 11/07/2007 | 98.6  | 0.4 | 16.9 | 10.5 | 9.1  | 8.5 | 126.3 | -0.38 | -0.27 |
| 07MI07-3 | 11/13/2007 | 85.7  | 0.5 | 15.4 | 8.8  | 7.8  | 7.2 | 111.8 | -0.04 | -0.30 |
| 07MI07-3 | 11/14/2007 | 90.5  | 1.0 | 15.9 | 10.7 | 10.8 | 8.2 | 110.8 | 0.08  | 0.46  |
| 07MI07-3 | 11/16/2007 | 90.7  | 0.8 | 15.6 | 12.2 | 10.3 | 8.4 | 106.1 | -0.32 | 0.44  |
| 07MI07-3 | 11/19/2007 | 86.4  | 0.8 | 15.5 | 11.4 | 10.2 | 8.4 | 106.4 | -0.31 | 0.28  |
| 07MI07-3 | 11/26/2007 | 88.9  | 0.7 | 15.0 | 10.6 | 9.8  | 8.6 | 108.2 | -0.33 | -0.03 |
| 07MI07-3 | 12/06/2007 | 88.0  | 0.7 | 14.3 | 12.1 | 10.6 | 8.5 | 97.0  | -0.56 | 0.34  |
| 07MI07-3 | 12/20/2007 | 85.4  | 0.3 | 14.4 | 11.4 | 10.4 | 8.3 | 106.0 | -0.92 | 0.00  |
| 07MI07-3 | 01/10/2008 | 103.0 | 0.7 | 20.5 | 9.9  | 8.1  | 7.8 | 145.5 | 0.40  | -0.05 |
| 07MI07-3 | 01/19/2008 | 106.7 | 0.8 | 21.5 | 10.2 | 8.6  | 7.7 | 153.5 | 0.58  | 0.19  |
| 07MI07-3 | 01/24/2008 | 99.7  | 1.0 | 17.5 | 10.7 | 10.4 | 7.6 | 130.4 | 0.45  | 0.63  |
| 07MI07-3 | 01/30/2008 | 105.5 | 0.5 | 18.7 | 10.0 | 8.8  | 7.7 | 136.9 | 0.12  | -0.05 |
| 07MI07-3 | 02/05/2008 | 107.8 | 0.5 | 20.2 | 10.2 | 8.5  | 7.5 | 150.4 | 0.26  | 0.03  |
| 07MI07-3 | 02/13/2008 | 111.9 | 0.7 | 21.3 | 9.5  | 8.2  | 7.7 | 154.3 | 0.63  | -0.04 |
| 07MI07-3 | 02/21/2008 | 103.1 | 0.7 | 20.5 | 9.5  | 7.5  | 7.5 | 152.0 | 0.56  | -0.10 |
| 07MI07-3 | 02/28/2008 | 110.1 | 0.4 | 23.5 | 8.5  | 7.8  | 7.3 | 172.5 | 0.53  | -0.32 |
| 07MI07-3 | 03/26/2008 | 93.8  | 0.6 | 16.5 | 12.3 | 11.1 | 7.7 | 114.0 | -0.39 | 0.66  |
| 07MI07-3 | 05/13/2008 | 125.0 | 0.9 | 31.2 | 7.4  | 6.0  | 7.1 | 206.0 | 1.80  | -0.25 |
| 07MI07-3 | 06/25/2008 | 131.0 | 0.9 | 32.4 | 7.2  | 5.9  | 7.0 | 210.0 | 1.96  | -0.24 |
| 07MI07-3 | 07/17/2008 | 131.0 | 0.6 | 34.0 | 6.9  | 5.8  | 6.9 | 226.0 | 1.74  | -0.46 |
| 07MI07-3 | 08/19/2008 | 115.0 | 0.6 | 30.6 | 6.7  | 4.5  | 5.6 | 202.0 | 1.72  | -0.33 |
| 07MI07-3 | 09/08/2008 | 127.0 | 0.8 | 36.2 | 6.3  | 5.2  | 7.0 | 233.0 | 2.04  | -0.53 |
| 07MI07-3 | 10/22/2008 | 87.5  | 0.6 | 17.2 | 11.3 | 9.0  | 8.5 | 117.0 | -0.41 | -0.04 |
| 07MI07-3 | 11/04/2008 | 102.0 | 0.5 | 18.1 | 11.6 | 12.9 | 7.5 | 134.0 | -0.30 | 0.83  |
| 07MI07-3 | 12/08/2008 | 93.9  | 0.5 | 16.9 | 13.5 | 11.3 | 7.7 | 111.0 | -0.64 | 0.82  |
| 07MI07-3 | 01/22/2009 | 112.0 | 0.5 | 24.4 | 8.5  | 7.2  | 7.0 | 173.0 | 0.78  | -0.23 |
| 07MI07-3 | 02/13/2009 | 107.0 | 0.2 | 21.6 | 8.3  | 9.0  | 7.4 | 167.0 | 0.13  | -0.37 |
| 07MI07-3 | 03/20/2009 | 113.6 | 0.6 | 24.5 | 9.6  | 8.2  | 7.7 | 174.1 | 0.63  | -0.06 |
| 07MI07-3 | 04/14/2009 | 112.5 | 0.6 | 24.1 | 9.4  | 9.8  | 8.0 | 172.9 | 0.48  | 0.02  |
| 07MI07-3 | 06/01/2009 | 112.9 | 0.6 | 24.5 | 9.3  | 9.5  | 7.8 | 175.0 | 0.54  | 0.02  |
| 07MI07-3 | 06/27/2009 | 112.8 | 0.6 | 24.0 | 9.5  | 9.2  | 7.9 | 171.7 | 0.50  | -0.01 |
| 07MI07-3 | 07/20/2009 | 114.9 | 0.6 | 23.6 | 10.5 | 9.8  | 8.5 | 176.7 | 0.29  | 0.05  |
| 07MI07-3 | 08/17/2009 | 96.4  | 0.5 | 18.0 | 12.0 | 13.4 | 8.4 | 119.6 | -0.69 | 0.66  |
| 07MI07-3 | 09/15/2009 | 101.0 | 0.5 | 19.0 | 10.7 | 9.7  | 8.0 | 129.0 | -0.15 | 0.08  |
| 07MI07-3 | 10/28/2009 | 92.0  | 0.4 | 15.0 | 12.7 | 13.0 | 8.4 | 108.0 | -0.98 | 0.61  |
| 07MI07-3 | 11/23/2009 | 90.0  | 0.4 | 14.0 | 11.8 | 14.0 | 8.5 | 98.0  | -1.05 | 0.56  |
| 07MI07-3 | 12/22/2009 | 87.0  | 0.4 | 13.0 | 12.3 | 14.0 | 8.7 | 89.0  | -1.22 | 0.56  |

|          |            |       |     |      |      |      |     |       |       |       |
|----------|------------|-------|-----|------|------|------|-----|-------|-------|-------|
| 07MI07-3 | 01/25/2010 | 85.0  | 0.4 | 13.0 | 12.7 | 13.0 | 9.2 | 88.0  | -1.33 | 0.32  |
| 07MI07-3 | 02/09/2010 | 73.0  | 0.4 | 9.9  | 14.0 | 16.0 | 9.1 | 51.0  | -1.97 | 0.92  |
| 07MI07-3 | 04/21/2010 | 85.0  | 0.4 | 13.0 | 13.0 | 12.0 | 8.9 | 87.0  | -1.25 | 0.34  |
| 07MI07-3 | 06/24/2010 | 84.0  | 0.4 | 12.0 | 13.0 | 12.0 | 9.4 | 84.0  | -1.39 | 0.17  |
| 07MI07-3 | 08/12/2010 | 84.0  | 0.4 | 13.0 | 13.0 | 12.0 | 9.7 | 87.0  | -1.43 | 0.09  |
| 07MI07-3 | 10/04/2010 | 84.0  | 0.4 | 12.0 | 13.0 | 12.0 | 9.3 | 87.0  | -1.36 | 0.20  |
| 07MI07-3 | 12/28/2010 | 89.0  | 0.4 | 14.0 | 12.0 | 9.1  | 8.8 | 102.0 | -0.85 | -0.17 |
| 07MI07-3 | 02/03/2011 | 87.0  | 0.4 | 13.0 | 13.0 | 11.0 | 9.0 | 95.0  | -1.16 | 0.18  |
| 07MI07-3 | 04/08/2011 | 89.0  | 0.4 | 13.0 | 12.0 | 11.0 | 9.1 | 97.0  | -1.05 | -0.01 |
| 07MI07-3 | 07/01/2011 | 88.0  | 0.4 | 13.0 | 12.0 | 12.0 | 8.8 | 97.0  | -1.06 | 0.22  |
| 07MI07-3 | 08/12/2011 | 89.0  | 0.4 | 13.0 | 12.0 | 11.0 | 8.9 | 101.0 | -0.99 | 0.05  |
| 07MI07-3 | 10/17/2011 | 89.0  | 0.4 | 13.0 | 12.0 | 12.0 | 8.8 | 99.0  | -1.04 | 0.22  |
| 07MI07-3 | 12/12/2011 | 91.0  | 0.4 | 13.0 | 12.0 | 11.0 | 8.5 | 103.0 | -0.87 | 0.18  |
| 07MI07-3 | 02/23/2012 | 91.0  | 0.4 | 15.0 | 11.0 | 11.0 | 8.7 | 106.0 | -0.79 | -0.03 |
| 07MI07-3 | 05/08/2012 | 92.0  | 0.4 | 14.0 | 12.0 | 11.0 | 8.7 | 105.0 | -0.88 | 0.13  |
| 07MI07-3 | 06/11/2012 | 94.0  | 0.5 | 15.0 | 11.0 | 11.0 | 8.8 | 112.0 | -0.62 | 0.02  |
| 07MI07-3 | 08/28/2012 | 97.0  | 0.5 | 16.0 | 10.0 | 9.6  | 9.0 | 122.0 | -0.39 | -0.38 |
| 07MI07-3 | 10/18/2012 | 92.0  | 0.4 | 14.0 | 11.0 | 11.0 | 9.2 | 106.0 | -0.88 | -0.19 |
| 07MI07-3 | 12/10/2012 | 98.0  | 0.5 | 16.0 | 9.5  | 8.4  | 9.1 | 124.0 | -0.28 | -0.66 |
| 07MI07-3 | 02/20/2013 | 104.0 | 0.5 | 17.0 | 8.7  | 5.7  | 9.2 | 143.0 | 0.11  | -1.16 |
| 07MI07-3 | 03/11/2013 | 102.0 | 0.5 | 17.0 | 8.9  | 6.3  | 9.3 | 140.0 | -0.01 | -1.08 |
| 07MI07-3 | 06/17/2013 | 102.0 | 0.5 | 17.0 | 8.3  | 5.9  | 9.4 | 141.0 | 0.06  | -1.27 |
| 07MI07-3 | 09/26/2013 | 75.0  | 0.3 | 9.3  | 14.0 | 13.0 | 9.5 | 63.0  | -1.92 | 0.33  |
| 07MI07-3 | 11/18/2013 | 71.0  | 0.3 | 8.6  | 13.0 | 14.0 | 9.5 | 52.0  | -2.00 | 0.28  |
| 07MI07-3 | 02/20/2014 | 100.0 | 0.4 | 16.0 | 8.2  | 5.6  | 9.5 | 137.0 | -0.11 | -1.44 |
| 07MI07-4 | 10/15/2007 | 127.6 | 1.0 | 32.7 | 6.9  | 4.0  | 7.8 | 219.9 | 2.05  | -0.73 |
| 07MI07-4 | 10/25/2007 | 114.2 | 0.8 | 24.1 | 9.0  | 7.5  | 7.9 | 170.9 | 0.92  | -0.18 |
| 07MI07-4 | 11/05/2007 | 104.5 | 0.7 | 20.3 | 9.6  | 7.3  | 8.2 | 146.1 | 0.42  | -0.33 |
| 07MI07-4 | 11/14/2007 | 96.6  | 0.8 | 18.4 | 9.1  | 8.6  | 8.2 | 130.1 | 0.31  | -0.20 |
| 07MI07-4 | 11/16/2007 | 100.7 | 0.9 | 19.5 | 9.1  | 7.3  | 8.1 | 142.6 | 0.64  | -0.26 |
| 07MI07-4 | 11/19/2007 | 73.3  | 0.7 | 11.1 | 14.2 | 13.5 | 8.6 | 66.5  | -1.31 | 0.99  |
| 07MI07-4 | 11/28/2007 | 96.9  | 0.5 | 18.6 | 9.6  | 7.6  | 8.4 | 129.3 | -0.07 | -0.52 |
| 07MI07-4 | 12/07/2007 | 101.3 | 0.5 | 19.4 | 9.0  | 7.3  | 8.0 | 140.8 | 0.20  | -0.51 |
| 07MI07-4 | 12/21/2007 | 118.4 | 0.8 | 28.5 | 8.0  | 5.5  | 7.8 | 190.5 | 1.33  | -0.54 |
| 07MI07-4 | 02/06/2008 | 127.8 | 0.6 | 34.0 | 7.1  | 4.8  | 7.3 | 217.5 | 1.62  | -0.70 |
| 07MI07-4 | 02/14/2008 | 130.1 | 0.9 | 33.8 | 6.7  | 4.9  | 7.2 | 223.3 | 2.08  | -0.51 |
| 07MI07-4 | 02/25/2008 | 122.5 | 0.8 | 32.4 | 6.4  | 4.8  | 7.0 | 220.2 | 1.89  | -0.60 |
| 07MI07-4 | 03/03/2008 | 123.4 | 0.8 | 34.1 | 6.5  | 2.8  | 7.2 | 220.6 | 1.99  | -0.91 |
| 07MI07-4 | 03/26/2008 | 91.0  | 0.7 | 16.6 | 12.2 | 11.0 | 7.6 | 113.0 | -0.28 | 0.73  |
| 07MI07-4 | 05/13/2008 | 134.0 | 1.0 | 38.6 | 6.1  | 3.9  | 7.1 | 246.0 | 2.53  | -0.60 |
| 07MI07-4 | 06/25/2008 | 138.0 | 1.0 | 39.1 | 6.1  | 3.7  | 7.1 | 253.0 | 2.63  | -0.61 |
| 07MI07-4 | 07/17/2008 | 139.0 | 0.6 | 41.2 | 6.0  | 4.4  | 7.0 | 253.0 | 2.18  | -0.76 |
| 07MI07-4 | 08/19/2008 | 120.0 | 0.7 | 36.7 | 5.7  | 3.2  | 5.6 | 227.0 | 2.24  | -0.55 |
| 07MI07-4 | 09/08/2008 | 134.0 | 0.7 | 42.4 | 4.9  | 4.2  | 7.1 | 261.0 | 2.36  | -0.92 |
| 07MI07-4 | 10/22/2008 | 87.5  | 0.7 | 17.3 | 11.3 | 9.0  | 8.6 | 117.0 | -0.31 | -0.01 |
| 07MI07-4 | 11/04/2008 | 102.0 | 0.5 | 19.9 | 11.6 | 10.4 | 7.5 | 132.0 | -0.14 | 0.49  |
| 07MI07-4 | 12/08/2008 | 93.7  | 0.5 | 16.6 | 12.6 | 11.3 | 7.6 | 111.0 | -0.54 | 0.70  |
| 07MI07-4 | 01/22/2009 | 111.0 | 0.5 | 24.0 | 8.6  | 6.5  | 7.1 | 174.0 | 0.78  | -0.34 |
| 07MI07-4 | 02/13/2009 | 111.0 | 0.5 | 25.4 | 7.8  | 7.4  | 7.3 | 180.0 | 0.80  | -0.40 |
| 07MI07-4 | 03/20/2009 | 116.4 | 0.6 | 27.3 | 9.2  | 7.4  | 7.8 | 185.5 | 0.83  | -0.23 |
| 07MI07-4 | 04/14/2009 | 115.9 | 0.6 | 27.5 | 8.9  | 8.1  | 8.1 | 187.3 | 0.76  | -0.28 |
| 07MI07-4 | 06/01/2009 | 114.4 | 0.6 | 27.0 | 8.6  | 8.4  | 8.1 | 185.6 | 0.69  | -0.31 |
| 07MI07-4 | 06/27/2009 | 118.2 | 0.6 | 28.4 | 8.3  | 10.9 | 8.1 | 190.7 | 0.71  | 0.03  |
| 07MI07-4 | 07/20/2009 | 118.2 | 0.6 | 27.0 | 9.7  | 8.4  | 8.9 | 190.1 | 0.54  | -0.34 |
| 07MI07-4 | 08/17/2009 | 95.4  | 0.5 | 17.6 | 12.0 | 13.3 | 8.4 | 119.7 | -0.72 | 0.62  |
| 07MI07-4 | 10/28/2009 | 97.0  | 0.5 | 17.0 | 11.1 | 10.0 | 8.6 | 121.0 | -0.43 | -0.03 |
| 07MI07-4 | 11/23/2009 | 96.0  | 0.4 | 16.0 | 10.4 | 11.0 | 8.7 | 117.0 | -0.60 | -0.12 |
| 07MI07-4 | 12/22/2009 | 97.0  | 0.5 | 16.0 | 10.2 | 9.9  | 8.9 | 118.0 | -0.42 | -0.28 |
| 07MI07-4 | 01/25/2010 | 93.0  | 0.4 | 15.0 | 10.4 | 9.8  | 9.2 | 115.0 | -0.70 | -0.44 |
| 07MI07-4 | 02/09/2010 | 73.0  | 0.4 | 9.9  | 15.0 | 16.0 | 9.1 | 51.0  | -2.06 | 1.09  |

|          |            |       |     |      |      |      |     |       |       |       |
|----------|------------|-------|-----|------|------|------|-----|-------|-------|-------|
| 07MI07-4 | 04/21/2010 | 96.0  | 0.5 | 16.0 | 10.0 | 8.9  | 8.9 | 125.0 | -0.34 | -0.45 |
| 07MI07-4 | 06/24/2010 | 94.0  | 0.4 | 15.0 | 10.0 | 8.3  | 9.4 | 117.0 | -0.59 | -0.77 |
| 07MI07-4 | 08/12/2010 | 94.0  | 0.4 | 15.0 | 10.0 | 8.4  | 9.8 | 120.0 | -0.66 | -0.88 |
| 07MI07-4 | 10/04/2010 | 94.0  | 0.4 | 15.0 | 11.0 | 8.4  | 9.4 | 118.0 | -0.69 | -0.59 |
| 07MI07-4 | 12/28/2010 | 98.0  | 0.5 | 16.0 | 9.9  | 5.9  | 8.7 | 128.0 | -0.08 | -0.81 |
| 07MI07-4 | 02/03/2011 | 95.0  | 0.4 | 15.0 | 11.0 | 8.7  | 9.0 | 119.0 | -0.61 | -0.42 |
| 07MI07-4 | 04/08/2011 | 96.0  | 0.4 | 15.0 | 10.0 | 8.7  | 9.0 | 120.0 | -0.49 | -0.58 |
| 07MI07-4 | 07/01/2011 | 99.0  | 0.5 | 16.0 | 9.7  | 8.2  | 8.8 | 132.0 | -0.18 | -0.55 |
| 07MI07-4 | 08/12/2011 | 101.0 | 0.5 | 17.0 | 9.7  | 7.9  | 8.9 | 136.0 | -0.13 | -0.61 |
| 07MI07-4 | 10/17/2011 | 102.0 | 0.5 | 17.0 | 9.2  | 8.0  | 8.7 | 138.0 | -0.02 | -0.62 |
| 07MI07-4 | 12/12/2011 | 105.0 | 0.5 | 17.0 | 9.3  | 7.5  | 8.5 | 145.0 | 0.11  | -0.60 |
| 07MI07-4 | 02/23/2012 | 102.0 | 0.5 | 18.0 | 8.9  | 7.8  | 8.8 | 139.0 | 0.01  | -0.72 |
| 07MI07-4 | 05/08/2012 | 105.0 | 0.5 | 18.0 | 9.1  | 7.4  | 8.8 | 147.0 | 0.09  | -0.73 |
| 07MI07-4 | 06/11/2012 | 106.0 | 0.5 | 18.0 | 8.3  | 7.4  | 8.9 | 149.0 | 0.17  | -0.89 |
| 07MI07-4 | 08/28/2012 | 107.0 | 0.5 | 19.0 | 8.2  | 6.9  | 9.1 | 150.0 | 0.20  | -1.03 |
| 07MI07-4 | 10/18/2012 | 104.0 | 0.5 | 18.0 | 8.3  | 7.0  | 9.1 | 145.0 | 0.11  | -1.01 |
| 07MI07-4 | 12/10/2012 | 108.0 | 0.5 | 19.0 | 7.7  | 5.7  | 9.2 | 153.0 | 0.32  | -1.30 |
| 07MI07-4 | 02/20/2013 | 110.0 | 0.5 | 19.0 | 7.4  | 4.5  | 9.3 | 159.0 | 0.45  | -1.54 |
| 07MI07-4 | 03/11/2013 | 110.0 | 0.5 | 19.0 | 7.3  | 4.6  | 9.4 | 163.0 | 0.45  | -1.57 |
| 07MI07-4 | 06/17/2013 | 105.0 | 0.5 | 17.0 | 7.6  | 5.0  | 9.5 | 150.0 | 0.23  | -1.52 |
| 07MI07-4 | 09/26/2013 | 89.0  | 0.4 | 13.0 | 11.0 | 8.7  | 9.5 | 106.0 | -0.86 | -0.61 |
| 07MI07-4 | 11/18/2013 | 78.0  | 0.4 | 10.0 | 12.0 | 12.0 | 9.5 | 70.0  | -1.48 | -0.06 |
| 07MI07-4 | 02/20/2014 | 107.0 | 0.5 | 18.0 | 6.5  | 3.5  | 9.5 | 155.0 | 0.48  | -1.90 |
| 07MI07-5 | 10/15/2007 | 133.3 | 1.0 | 37.0 | 6.3  | 3.3  | 7.6 | 237.6 | 2.39  | -0.82 |
| 07MI07-5 | 10/25/2007 | 114.1 | 0.8 | 25.6 | 8.4  | 7.2  | 8.0 | 171.8 | 0.99  | -0.34 |
| 07MI07-5 | 11/05/2007 | 105.0 | 0.7 | 21.6 | 9.2  | 7.0  | 8.2 | 146.1 | 0.50  | -0.43 |
| 07MI07-5 | 11/13/2007 | 100.6 | 0.5 | 19.3 | 9.4  | 7.7  | 8.3 | 136.4 | 0.05  | -0.49 |
| 07MI07-5 | 11/14/2007 | 97.2  | 0.9 | 19.1 | 9.3  | 7.4  | 8.2 | 132.7 | 0.51  | -0.26 |
| 07MI07-5 | 11/16/2007 | 108.7 | 0.9 | 22.8 | 8.8  | 6.2  | 8.1 | 163.2 | 0.97  | -0.41 |
| 07MI07-5 | 11/19/2007 | 98.1  | 0.9 | 20.8 | 9.0  | 7.1  | 8.4 | 143.6 | 0.59  | -0.39 |
| 07MI07-5 | 11/29/2007 | 103.1 | 0.5 | 21.0 | 8.6  | 6.4  | 8.3 | 146.7 | 0.29  | -0.78 |
| 07MI07-5 | 12/10/2007 | 110.1 | 0.8 | 25.2 | 8.4  | 7.2  | 7.8 | 163.9 | 0.94  | -0.30 |
| 07MI07-5 | 12/22/2007 | 124.2 | 0.9 | 31.1 | 7.3  | 4.5  | 7.7 | 206.4 | 1.77  | -0.66 |
| 07MI07-5 | 02/07/2008 | 128.1 | 1.0 | 31.3 | 6.6  | 4.7  | 7.5 | 218.7 | 2.09  | -0.60 |
| 07MI07-5 | 02/15/2008 | 128.8 | 0.9 | 34.8 | 7.0  | 4.6  | 7.3 | 232.8 | 2.08  | -0.52 |
| 07MI07-5 | 02/22/2008 | 123.0 | 0.8 | 33.1 | 6.4  | 4.3  | 7.2 | 221.7 | 1.90  | -0.73 |
| 07MI07-5 | 03/04/2008 | 127.2 | 0.8 | 34.8 | 6.2  | 3.5  | 7.1 | 232.3 | 2.11  | -0.81 |
| 07MI07-5 | 03/26/2008 | 91.2  | 0.6 | 16.7 | 12.4 | 10.9 | 7.6 | 112.0 | -0.42 | 0.68  |
| 07MI07-5 | 05/13/2008 | 136.0 | 1.0 | 39.1 | 6.2  | 4.3  | 7.3 | 249.0 | 2.50  | -0.58 |
| 07MI07-5 | 06/25/2008 | 138.0 | 1.0 | 38.2 | 6.2  | 4.1  | 7.1 | 250.0 | 2.58  | -0.55 |
| 07MI07-5 | 07/17/2008 | 137.0 | 0.6 | 39.9 | 6.0  | 4.4  | 7.0 | 247.0 | 2.11  | -0.77 |
| 07MI07-5 | 08/19/2008 | 115.0 | 0.6 | 33.5 | 3.1  | 3.9  | 5.7 | 213.0 | 2.14  | -1.01 |
| 07MI07-5 | 09/08/2008 | 131.0 | 0.8 | 42.2 | 5.5  | 4.3  | 7.2 | 252.0 | 2.32  | -0.79 |
| 07MI07-5 | 10/22/2008 | 87.4  | 0.6 | 17.3 | 11.3 | 9.3  | 8.7 | 117.0 | -0.47 | -0.07 |
| 07MI07-5 | 11/04/2008 | 103.0 | 0.5 | 19.9 | 11.6 | 10.5 | 7.5 | 134.0 | -0.12 | 0.51  |
| 07MI07-5 | 12/08/2008 | 93.3  | 0.5 | 16.3 | 12.4 | 11.3 | 7.6 | 117.0 | -0.51 | 0.67  |
| 07MI07-5 | 01/22/2009 | 114.0 | 0.5 | 27.0 | 7.9  | 7.7  | 7.1 | 184.0 | 0.89  | -0.26 |
| 07MI07-5 | 02/13/2009 | 113.0 | 0.5 | 27.0 | 7.4  | 6.8  | 7.3 | 186.0 | 0.94  | -0.53 |
| 07MI07-5 | 03/20/2009 | 100.4 | 0.5 | 19.7 | 11.8 | 12.1 | 7.9 | 134.1 | -0.33 | 0.65  |
| 07MI07-5 | 04/14/2009 | 117.4 | 0.6 | 28.6 | 8.5  | 7.2  | 8.1 | 194.1 | 0.92  | -0.46 |
| 07MI07-5 | 06/01/2009 | 116.9 | 0.6 | 28.5 | 8.2  | 7.6  | 8.2 | 192.9 | 0.89  | -0.47 |
| 07MI07-5 | 06/27/2009 | 118.6 | 0.6 | 30.5 | 9.2  | 7.5  | 8.1 | 193.5 | 0.83  | -0.31 |
| 07MI07-5 | 07/20/2009 | 121.1 | 0.6 | 28.6 | 9.3  | 7.7  | 8.9 | 199.9 | 0.76  | -0.47 |
| 07MI07-5 | 08/17/2009 | 96.1  | 0.5 | 17.8 | 11.9 | 13.4 | 8.4 | 119.9 | -0.70 | 0.63  |
| 07MI07-5 | 09/15/2009 | 100.0 | 0.5 | 19.0 | 9.6  | 7.7  | 8.5 | 132.0 | -0.04 | -0.52 |
| 07MI07-5 | 10/28/2009 | 95.0  | 0.4 | 17.0 | 11.0 | 10.0 | 8.6 | 122.0 | -0.57 | -0.10 |
| 07MI07-5 | 11/23/2009 | 95.0  | 0.4 | 16.0 | 10.2 | 10.0 | 8.7 | 120.0 | -0.53 | -0.28 |
| 07MI07-5 | 12/22/2009 | 97.0  | 0.5 | 16.0 | 9.8  | 11.0 | 8.9 | 120.0 | -0.45 | -0.19 |
| 07MI07-5 | 01/25/2010 | 95.0  | 0.4 | 16.0 | 10.1 | 9.3  | 9.2 | 119.0 | -0.59 | -0.54 |
| 07MI07-5 | 02/09/2010 | 73.0  | 0.4 | 9.9  | 15.0 | 16.0 | 9.1 | 51.0  | -2.06 | 1.09  |



|          |            |       |     |      |      |      |     |       |       |       |
|----------|------------|-------|-----|------|------|------|-----|-------|-------|-------|
| 07MI07-5 | 04/21/2010 | 97.0  | 0.5 | 16.0 | 10.0 | 9.3  | 9.0 | 128.0 | -0.35 | -0.42 |
| 07MI07-5 | 06/24/2010 | 97.0  | 0.4 | 16.0 | 9.8  | 7.6  | 9.4 | 124.0 | -0.45 | -0.88 |
| 07MI07-5 | 08/12/2010 | 96.0  | 0.4 | 16.0 | 9.8  | 7.7  | 9.8 | 127.0 | -0.54 | -0.99 |
| 07MI07-5 | 10/04/2010 | 96.0  | 0.4 | 15.0 | 10.0 | 7.8  | 9.4 | 125.0 | -0.50 | -0.83 |
| 07MI07-5 | 12/28/2010 | 100.0 | 0.5 | 16.0 | 9.5  | 5.8  | 9.0 | 135.0 | -0.03 | -0.97 |
| 07MI07-5 | 02/03/2011 | 97.0  | 0.4 | 15.0 | 11.0 | 8.0  | 9.1 | 125.0 | -0.53 | -0.54 |
| 07MI07-5 | 04/08/2011 | 96.0  | 0.4 | 15.0 | 10.0 | 8.4  | 9.0 | 119.0 | -0.48 | -0.63 |
| 07MI07-5 | 07/01/2011 | 101.0 | 0.5 | 17.0 | 9.3  | 8.0  | 8.8 | 136.0 | -0.07 | -0.63 |
| 07MI07-5 | 08/12/2011 | 102.0 | 0.5 | 17.0 | 9.5  | 7.8  | 8.9 | 138.0 | -0.08 | -0.66 |
| 07MI07-5 | 10/17/2011 | 102.0 | 0.5 | 17.0 | 9.2  | 7.9  | 8.7 | 138.0 | -0.02 | -0.63 |
| 07MI07-5 | 12/12/2011 | 105.0 | 0.5 | 18.0 | 9.4  | 7.4  | 8.5 | 145.0 | 0.11  | -0.59 |
| 07MI07-5 | 02/23/2012 | 102.0 | 0.5 | 18.0 | 9.0  | 7.9  | 8.8 | 138.0 | -0.01 | -0.69 |
| 07MI07-5 | 05/08/2012 | 105.0 | 0.5 | 18.0 | 9.0  | 7.4  | 8.8 | 146.0 | 0.10  | -0.75 |
| 07MI07-5 | 06/11/2012 | 105.0 | 0.5 | 18.0 | 8.4  | 7.4  | 8.8 | 149.0 | 0.16  | -0.84 |
| 07MI07-5 | 08/28/2012 | 106.0 | 0.5 | 19.0 | 8.1  | 6.8  | 9.1 | 151.0 | 0.20  | -1.06 |
| 07MI07-5 | 10/18/2012 | 106.0 | 0.5 | 18.0 | 8.1  | 6.6  | 9.2 | 149.0 | 0.17  | -1.12 |
| 07MI07-5 | 12/10/2012 | 109.0 | 0.5 | 19.0 | 7.5  | 5.5  | 9.2 | 156.0 | 0.38  | -1.36 |
| 07MI07-5 | 02/20/2013 | 110.0 | 0.5 | 19.0 | 7.4  | 4.8  | 9.3 | 160.0 | 0.44  | -1.50 |
| 07MI07-5 | 03/11/2013 | 110.0 | 0.5 | 19.0 | 7.3  | 4.7  | 9.4 | 163.0 | 0.44  | -1.55 |
| 07MI07-5 | 06/17/2013 | 106.0 | 0.5 | 18.0 | 7.5  | 4.8  | 9.5 | 151.0 | 0.28  | -1.56 |
| 07MI07-5 | 09/26/2013 | 92.0  | 0.4 | 14.0 | 10.0 | 8.3  | 9.4 | 117.0 | -0.63 | -0.78 |
| 07MI07-5 | 11/18/2013 | 95.0  | 0.4 | 14.0 | 8.7  | 7.9  | 9.4 | 119.0 | -0.44 | -1.04 |
| 07MI07-5 | 02/20/2014 | 106.0 | 0.5 | 18.0 | 6.3  | 4.3  | 9.5 | 154.0 | 0.43  | -1.82 |
| 09MI20-1 | 10/08/2009 | 89.0  | 0.4 | 14.0 | 13.1 | 13.0 | 8.5 | 95.0  | -1.14 | 0.64  |
| 09MI20-1 | 10/16/2009 | 84.0  | 0.4 | 12.0 | 13.5 | 13.0 | 8.8 | 84.0  | -1.37 | 0.57  |
| 09MI20-1 | 10/26/2009 | 80.0  | 0.4 | 11.0 | 14.0 | 14.0 | 8.5 | 72.0  | -1.53 | 0.86  |
| 09MI20-1 | 11/02/2009 | 79.0  | 0.4 | 11.0 | 15.4 | 15.0 | 8.5 | 65.0  | -1.77 | 1.23  |
| 09MI20-1 | 11/07/2009 | 78.0  | 0.4 | 11.0 | 14.5 | 14.0 | 8.5 | 69.0  | -1.63 | 0.95  |
| 09MI20-1 | 11/13/2009 | 79.0  | 0.4 | 10.0 | 14.1 | 15.0 | 8.6 | 63.0  | -1.68 | 0.98  |
| 09MI20-1 | 11/19/2009 | 78.0  | 0.4 | 9.3  | 14.5 | 15.0 | 8.4 | 60.0  | -1.71 | 1.09  |
| 09MI20-1 | 11/27/2009 | 77.0  | 0.4 | 8.8  | 15.4 | 16.0 | 8.4 | 58.0  | -1.88 | 1.37  |
| 09MI20-1 | 12/07/2009 | 77.0  | 0.3 | 8.0  | 14.5 | 16.0 | 8.3 | 56.0  | -1.92 | 1.19  |
| 09MI20-1 | 12/14/2009 | 78.0  | 0.4 | 9.0  | 15.5 | 16.0 | 8.4 | 56.0  | -1.88 | 1.39  |
| 09MI20-1 | 12/18/2009 | 79.0  | 0.4 | 9.0  | 14.9 | 16.0 | 8.5 | 55.0  | -1.83 | 1.26  |
| 09MI20-1 | 01/06/2010 | 78.0  | 0.4 | 8.8  | 15.2 | 16.0 | 8.4 | 54.0  | -1.87 | 1.35  |
| 09MI20-1 | 01/15/2010 | 76.0  | 0.3 | 8.4  | 14.8 | 16.0 | 8.3 | 52.0  | -1.97 | 1.24  |
| 09MI20-1 | 01/22/2010 | 76.0  | 0.4 | 8.6  | 15.7 | 17.0 | 8.6 | 52.0  | -2.05 | 1.50  |
| 09MI20-1 | 01/29/2010 | 76.0  | 0.3 | 8.7  | 14.9 | 16.0 | 8.6 | 53.0  | -2.03 | 1.16  |
| 09MI20-1 | 02/04/2010 | 76.0  | 0.3 | 8.5  | 15.0 | 17.0 | 8.6 | 52.0  | -2.10 | 1.31  |
| 09MI20-1 | 02/12/2010 | 76.0  | 0.3 | 8.5  | 15.0 | 16.0 | 8.6 | 52.0  | -2.05 | 1.17  |
| 09MI20-1 | 02/17/2010 | 76.0  | 0.3 | 8.5  | 14.0 | 15.0 | 8.6 | 52.0  | -1.90 | 0.87  |
| 09MI20-1 | 03/11/2010 | 75.0  | 0.3 | 8.5  | 17.0 | 17.0 | 8.4 | 53.0  | -2.26 | 1.70  |
| 09MI20-1 | 04/27/2010 | 76.0  | 0.4 | 8.5  | 16.0 | 16.0 | 8.3 | 53.0  | -1.96 | 1.50  |
| 09MI20-1 | 05/28/2010 | 76.0  | 0.4 | 8.7  | 17.0 | 16.0 | 8.4 | 55.0  | -2.06 | 1.63  |
| 09MI20-1 | 06/21/2010 | 77.0  | 0.3 | 8.8  | 16.0 | 15.0 | 8.4 | 57.0  | -2.00 | 1.27  |
| 09MI20-1 | 07/26/2010 | 77.0  | 0.4 | 8.6  | 16.0 | 15.0 | 8.7 | 56.0  | -1.95 | 1.24  |
| 09MI20-1 | 08/12/2010 | 77.0  | 0.4 | 8.9  | 16.0 | 15.0 | 9.1 | 57.0  | -2.02 | 1.12  |
| 09MI20-1 | 09/07/2010 | 77.0  | 0.3 | 8.8  | 16.0 | 16.0 | 8.9 | 58.0  | -2.16 | 1.25  |
| 09MI20-1 | 10/04/2010 | 77.0  | 0.4 | 8.9  | 16.0 | 15.0 | 8.6 | 58.0  | -1.92 | 1.28  |
| 09MI20-1 | 12/01/2010 | 86.0  | 0.4 | 10.0 | 11.0 | 10.0 | 9.3 | 92.0  | -1.03 | -0.40 |
| 09MI20-1 | 12/28/2010 | 81.0  | 0.4 | 9.9  | 16.0 | 13.0 | 8.6 | 72.0  | -1.68 | 1.02  |
| 09MI20-1 | 01/15/2011 | 82.0  | 0.4 | 9.5  | 16.0 | 14.0 | 8.7 | 69.0  | -1.76 | 1.13  |
| 09MI20-1 | 02/17/2011 | 81.0  | 0.4 | 9.3  | 15.0 | 14.0 | 8.4 | 63.0  | -1.65 | 1.05  |
| 09MI20-1 | 03/04/2011 | 81.0  | 0.4 | 9.4  | 16.0 | 15.0 | 8.5 | 66.0  | -1.80 | 1.32  |
| 09MI20-1 | 04/15/2011 | 83.0  | 0.4 | 9.8  | 15.0 | 13.0 | 8.5 | 71.0  | -1.54 | 0.89  |
| 09MI20-1 | 06/02/2011 | 82.0  | 0.4 | 9.6  | 15.0 | 14.0 | 8.4 | 69.0  | -1.61 | 1.06  |
| 09MI20-1 | 07/01/2011 | 81.0  | 0.4 | 9.3  | 15.0 | 15.0 | 8.6 | 66.0  | -1.73 | 1.13  |
| 09MI20-1 | 07/27/2011 | 81.0  | 0.4 | 9.3  | 15.0 | 14.0 | 8.5 | 67.0  | -1.65 | 1.02  |
| 09MI20-1 | 08/12/2011 | 81.0  | 0.4 | 9.3  | 15.0 | 14.0 | 8.7 | 65.0  | -1.70 | 0.96  |
| 09MI20-1 | 09/14/2011 | 82.0  | 0.4 | 9.5  | 15.0 | 14.0 | 8.3 | 65.0  | -1.60 | 1.09  |

|          |            |      |     |      |      |      |      |       |       |       |
|----------|------------|------|-----|------|------|------|------|-------|-------|-------|
| 09MI20-1 | 10/17/2011 | 80.0 | 0.4 | 9.1  | 15.0 | 15.0 | 8.5  | 64.0  | -1.74 | 1.15  |
| 09MI20-1 | 12/14/2011 | 81.0 | 0.4 | 9.1  | 16.0 | 15.0 | 8.3  | 62.0  | -1.78 | 1.38  |
| 09MI20-1 | 02/22/2012 | 79.0 | 0.4 | 9.4  | 16.0 | 15.0 | 8.4  | 60.0  | -1.84 | 1.35  |
| 09MI20-1 | 05/08/2012 | 79.0 | 0.4 | 8.8  | 15.0 | 16.0 | 8.5  | 59.0  | -1.83 | 1.28  |
| 09MI20-1 | 06/11/2012 | 79.0 | 0.4 | 9.0  | 15.0 | 16.0 | 8.5  | 60.0  | -1.83 | 1.29  |
| 09MI20-1 | 08/22/2012 | 76.0 | 0.4 | 8.5  | 16.0 | 18.0 | 8.6  | 48.0  | -2.15 | 1.68  |
| 09MI20-1 | 10/20/2012 | 80.0 | 0.4 | 9.4  | 14.0 | 14.0 | 9.1  | 66.0  | -1.69 | 0.67  |
| 09MI20-1 | 12/04/2012 | 82.0 | 0.4 | 10.0 | 14.0 | 12.0 | 9.1  | 72.0  | -1.52 | 0.41  |
| 09MI20-1 | 02/19/2013 | 82.0 | 0.4 | 10.0 | 14.0 | 13.0 | 9.4  | 74.0  | -1.63 | 0.45  |
| 09MI20-1 | 03/11/2013 | 81.0 | 0.4 | 10.0 | 13.0 | 13.0 | 9.6  | 73.0  | -1.59 | 0.22  |
| 09MI20-1 | 06/18/2013 | 79.0 | 0.4 | 9.8  | 13.0 | 13.0 | 9.7  | 71.0  | -1.65 | 0.19  |
| 09MI20-1 | 09/12/2013 | 77.0 | 0.4 | 9.4  | 14.0 | 14.0 | 9.7  | 66.0  | -1.86 | 0.48  |
| 09MI20-1 | 11/19/2013 | 78.0 | 0.4 | 9.3  | 14.0 | 14.0 | 9.6  | 65.0  | -1.83 | 0.51  |
| 09MI20-1 | 02/13/2014 | 77.0 | 0.4 | 9.4  | 13.0 | 13.0 | 9.7  | 67.0  | -1.70 | 0.18  |
| 09MI20-2 | 10/08/2009 | 86.0 | 0.4 | 12.0 | 13.8 | 14.0 | 8.5  | 85.0  | -1.37 | 0.86  |
| 09MI20-2 | 10/16/2009 | 81.0 | 0.4 | 11.0 | 14.1 | 14.0 | 8.7  | 72.0  | -1.57 | 0.83  |
| 09MI20-2 | 10/26/2009 | 80.0 | 0.4 | 11.0 | 14.4 | 15.0 | 8.5  | 68.0  | -1.65 | 1.07  |
| 09MI20-2 | 11/02/2009 | 77.0 | 0.4 | 10.0 | 15.6 | 15.0 | 8.4  | 62.0  | -1.82 | 1.29  |
| 09MI20-2 | 11/07/2009 | 80.0 | 0.4 | 10.0 | 14.7 | 14.0 | 8.4  | 66.0  | -1.62 | 1.01  |
| 09MI20-2 | 11/13/2009 | 77.0 | 0.4 | 9.1  | 14.3 | 15.0 | 8.4  | 60.0  | -1.71 | 1.05  |
| 09MI20-2 | 11/19/2009 | 78.0 | 0.4 | 9.1  | 14.7 | 16.0 | 8.4  | 58.0  | -1.80 | 1.26  |
| 09MI20-2 | 11/27/2009 | 76.0 | 0.3 | 8.4  | 15.5 | 16.0 | 8.4  | 57.0  | -2.04 | 1.32  |
| 09MI20-2 | 12/07/2009 | 77.0 | 0.3 | 7.9  | 14.6 | 16.0 | 8.2  | 54.0  | -1.91 | 1.23  |
| 09MI20-2 | 12/14/2009 | 78.0 | 0.4 | 8.9  | 15.7 | 16.0 | 8.4  | 54.0  | -1.91 | 1.42  |
| 09MI20-2 | 12/18/2009 | 78.0 | 0.4 | 8.8  | 14.8 | 16.0 | 8.4  | 54.0  | -1.83 | 1.28  |
| 09MI20-2 | 01/06/2010 | 78.0 | 0.4 | 8.6  | 15.5 | 17.0 | 8.3  | 52.0  | -1.94 | 1.56  |
| 09MI20-2 | 01/15/2010 | 76.0 | 0.3 | 8.4  | 15.0 | 16.0 | 8.2  | 50.0  | -1.98 | 1.29  |
| 09MI20-2 | 01/22/2010 | 76.0 | 0.3 | 8.3  | 15.9 | 17.0 | 8.6  | 50.0  | -2.19 | 1.45  |
| 09MI20-2 | 01/29/2010 | 76.0 | 0.3 | 8.3  | 15.1 | 17.0 | 8.6  | 50.0  | -2.12 | 1.33  |
| 09MI20-2 | 02/04/2010 | 75.0 | 0.3 | 8.3  | 15.0 | 17.0 | 8.5  | 50.0  | -2.11 | 1.34  |
| 09MI20-2 | 02/12/2010 | 74.0 | 0.3 | 8.1  | 15.0 | 16.0 | 8.5  | 50.0  | -2.07 | 1.20  |
| 09MI20-2 | 02/17/2010 | 75.0 | 0.3 | 8.3  | 14.0 | 15.0 | 8.5  | 50.0  | -1.90 | 0.90  |
| 09MI20-2 | 03/11/2010 | 75.0 | 0.3 | 8.3  | 17.0 | 16.0 | 8.3  | 51.0  | -2.19 | 1.59  |
| 09MI20-2 | 04/27/2010 | 75.0 | 0.3 | 8.3  | 17.0 | 16.0 | 8.3  | 51.0  | -2.19 | 1.59  |
| 09MI20-2 | 05/28/2010 | 75.0 | 0.3 | 8.3  | 17.0 | 16.0 | 8.3  | 52.0  | -2.19 | 1.59  |
| 09MI20-2 | 06/21/2010 | 75.0 | 0.3 | 8.4  | 16.0 | 17.0 | 8.3  | 53.0  | -2.15 | 1.57  |
| 09MI20-2 | 07/26/2010 | 76.0 | 0.3 | 8.2  | 16.0 | 15.0 | 8.6  | 52.0  | -2.08 | 1.20  |
| 09MI20-2 | 08/12/2010 | 76.0 | 0.3 | 8.6  | 16.0 | 16.0 | 9.0  | 54.0  | -2.21 | 1.21  |
| 09MI20-2 | 09/07/2010 | 76.0 | 0.3 | 8.4  | 17.0 | 16.0 | 8.8  | 55.0  | -2.26 | 1.44  |
| 09MI20-2 | 10/04/2010 | 76.0 | 0.3 | 8.4  | 17.0 | 16.0 | 8.5  | 54.0  | -2.20 | 1.53  |
| 09MI20-2 | 12/01/2010 | 90.0 | 0.5 | 9.6  | 7.6  | 6.6  | 10.0 | 111.0 | -0.41 | -1.56 |
| 09MI20-2 | 12/28/2010 | 79.0 | 0.4 | 9.0  | 16.0 | 14.0 | 8.4  | 64.0  | -1.77 | 1.21  |
| 09MI20-2 | 01/15/2011 | 80.0 | 0.4 | 9.0  | 16.0 | 15.0 | 8.5  | 62.0  | -1.84 | 1.32  |
| 09MI20-2 | 02/17/2011 | 78.0 | 0.4 | 8.8  | 16.0 | 16.0 | 8.4  | 58.0  | -1.92 | 1.48  |
| 09MI20-2 | 03/04/2011 | 78.0 | 0.4 | 8.8  | 16.0 | 15.0 | 8.4  | 58.0  | -1.87 | 1.34  |
| 09MI20-2 | 04/15/2011 | 81.0 | 0.4 | 9.3  | 15.0 | 14.0 | 8.4  | 66.0  | -1.64 | 1.05  |
| 09MI20-2 | 06/02/2011 | 80.0 | 0.4 | 9.1  | 16.0 | 15.0 | 8.4  | 63.0  | -1.81 | 1.35  |
| 09MI20-2 | 07/01/2011 | 79.0 | 0.4 | 8.8  | 16.0 | 15.0 | 8.5  | 61.0  | -1.86 | 1.31  |
| 09MI20-2 | 07/27/2011 | 79.0 | 0.4 | 8.8  | 16.0 | 15.0 | 8.5  | 60.0  | -1.86 | 1.31  |
| 09MI20-2 | 08/12/2011 | 78.0 | 0.4 | 8.6  | 16.0 | 15.0 | 8.6  | 57.0  | -1.91 | 1.28  |
| 09MI20-2 | 09/14/2011 | 80.0 | 0.4 | 9.0  | 16.0 | 15.0 | 8.3  | 60.0  | -1.81 | 1.38  |
| 09MI20-2 | 10/17/2011 | 78.0 | 0.4 | 8.5  | 16.0 | 16.0 | 8.4  | 58.0  | -1.93 | 1.47  |
| 09MI20-2 | 12/14/2011 | 78.0 | 0.4 | 8.4  | 16.0 | 16.0 | 8.2  | 56.0  | -1.90 | 1.53  |
| 09MI20-2 | 02/22/2012 | 77.0 | 0.3 | 8.9  | 16.0 | 16.0 | 8.3  | 55.0  | -2.05 | 1.44  |
| 09MI20-2 | 05/08/2012 | 77.0 | 0.4 | 8.5  | 16.0 | 17.0 | 8.4  | 55.0  | -2.01 | 1.61  |
| 09MI20-2 | 06/11/2012 | 77.0 | 0.4 | 8.7  | 15.0 | 17.0 | 8.4  | 57.0  | -1.91 | 1.45  |
| 09MI20-2 | 08/22/2012 | 76.0 | 0.3 | 8.5  | 16.0 | 18.0 | 8.6  | 48.0  | -2.27 | 1.61  |
| 09MI20-2 | 10/20/2012 | 79.0 | 0.4 | 8.9  | 15.0 | 16.0 | 8.9  | 60.0  | -1.91 | 1.16  |
| 09MI20-2 | 12/04/2012 | 81.0 | 0.4 | 9.7  | 14.0 | 13.0 | 8.9  | 65.0  | -1.58 | 0.60  |
| 09MI20-2 | 02/19/2013 | 85.0 | 0.4 | 11.0 | 13.0 | 12.0 | 9.4  | 81.0  | -1.40 | 0.17  |

|          |            |       |     |      |      |      |      |       |       |       |
|----------|------------|-------|-----|------|------|------|------|-------|-------|-------|
| 09MI20-2 | 03/11/2013 | 82.0  | 0.4 | 10.0 | 13.0 | 13.0 | 9.6  | 76.0  | -1.57 | 0.23  |
| 09MI20-2 | 06/18/2013 | 79.0  | 0.4 | 9.8  | 14.0 | 13.0 | 9.5  | 70.0  | -1.71 | 0.41  |
| 09MI20-2 | 09/12/2013 | 79.0  | 0.4 | 10.0 | 14.0 | 13.0 | 9.5  | 71.0  | -1.70 | 0.41  |
| 09MI20-2 | 11/19/2013 | 81.0  | 0.4 | 10.0 | 14.0 | 13.0 | 9.6  | 73.0  | -1.69 | 0.39  |
| 09MI20-2 | 02/13/2014 | 80.0  | 0.4 | 10.0 | 13.0 | 12.0 | 9.7  | 73.0  | -1.57 | 0.05  |
| 09MI20-3 | 10/08/2009 | 131.0 | 0.7 | 34.0 | 9.2  | 8.8  | 7.1  | 220.0 | 1.41  | 0.33  |
| 09MI20-3 | 10/16/2009 | 120.0 | 0.7 | 29.0 | 9.7  | 8.8  | 7.7  | 196.0 | 0.93  | 0.17  |
| 09MI20-3 | 10/26/2009 | 116.0 | 0.7 | 26.0 | 10.5 | 10.0 | 8.0  | 169.0 | 0.54  | 0.32  |
| 09MI20-3 | 11/02/2009 | 110.0 | 0.6 | 24.0 | 11.6 | 11.0 | 8.0  | 151.0 | 0.08  | 0.54  |
| 09MI20-3 | 11/07/2009 | 107.0 | 0.6 | 22.0 | 11.6 | 11.0 | 8.2  | 144.0 | -0.05 | 0.45  |
| 09MI20-3 | 11/13/2009 | 103.0 | 0.6 | 21.0 | 11.0 | 12.0 | 8.4  | 137.0 | -0.19 | 0.42  |
| 09MI20-3 | 11/19/2009 | 103.0 | 0.6 | 20.0 | 11.4 | 12.0 | 8.4  | 135.0 | -0.25 | 0.47  |
| 09MI20-3 | 11/27/2009 | 101.0 | 0.6 | 19.0 | 12.2 | 12.0 | 8.5  | 129.0 | -0.40 | 0.55  |
| 09MI20-3 | 12/07/2009 | 102.0 | 0.6 | 18.0 | 11.6 | 12.0 | 8.6  | 122.0 | -0.38 | 0.41  |
| 09MI20-3 | 12/14/2009 | 100.0 | 0.6 | 18.0 | 12.5 | 13.0 | 8.7  | 117.0 | -0.59 | 0.66  |
| 09MI20-3 | 12/18/2009 | 98.0  | 0.6 | 17.0 | 12.3 | 12.0 | 8.7  | 113.0 | -0.58 | 0.49  |
| 09MI20-3 | 01/06/2010 | 99.0  | 0.6 | 18.0 | 12.5 | 13.0 | 8.7  | 117.0 | -0.61 | 0.66  |
| 09MI20-3 | 01/15/2010 | 92.0  | 0.5 | 15.0 | 12.8 | 13.0 | 8.8  | 99.0  | -0.99 | 0.58  |
| 09MI20-3 | 01/22/2010 | 89.0  | 0.5 | 15.0 | 13.8 | 14.0 | 9.2  | 92.0  | -1.29 | 0.74  |
| 09MI20-3 | 01/29/2010 | 88.0  | 0.5 | 15.0 | 13.2 | 14.0 | 9.2  | 90.0  | -1.25 | 0.63  |
| 09MI20-3 | 02/04/2010 | 87.0  | 0.5 | 14.0 | 13.0 | 15.0 | 9.2  | 88.0  | -1.32 | 0.73  |
| 09MI20-3 | 02/12/2010 | 87.0  | 0.5 | 14.0 | 13.0 | 14.0 | 9.2  | 85.0  | -1.28 | 0.59  |
| 09MI20-3 | 02/17/2010 | 85.0  | 0.5 | 13.0 | 13.0 | 14.0 | 9.1  | 84.0  | -1.30 | 0.61  |
| 09MI20-3 | 03/11/2010 | 85.0  | 0.5 | 13.0 | 15.0 | 15.0 | 9.0  | 81.0  | -1.54 | 1.11  |
| 09MI20-3 | 04/27/2010 | 83.0  | 0.5 | 12.0 | 15.0 | 15.0 | 9.0  | 76.0  | -1.59 | 1.10  |
| 09MI20-3 | 05/28/2010 | 83.0  | 0.5 | 12.0 | 16.0 | 15.0 | 9.0  | 77.0  | -1.68 | 1.26  |
| 09MI20-3 | 06/21/2010 | 82.0  | 0.5 | 12.0 | 15.0 | 14.0 | 8.9  | 75.0  | -1.54 | 0.99  |
| 09MI20-3 | 07/26/2010 | 81.0  | 0.5 | 11.0 | 15.0 | 15.0 | 9.3  | 70.0  | -1.72 | 0.99  |
| 09MI20-3 | 08/12/2010 | 81.0  | 0.5 | 12.0 | 15.0 | 15.0 | 9.7  | 70.0  | -1.78 | 0.87  |
| 09MI20-3 | 09/07/2010 | 81.0  | 0.5 | 11.0 | 16.0 | 15.0 | 9.5  | 72.0  | -1.84 | 1.09  |
| 09MI20-3 | 10/04/2010 | 81.0  | 0.5 | 11.0 | 16.0 | 15.0 | 9.2  | 69.0  | -1.79 | 1.18  |
| 09MI20-3 | 12/01/2010 | 82.0  | 0.5 | 11.0 | 14.0 | 14.0 | 9.2  | 77.0  | -1.51 | 0.73  |
| 09MI20-3 | 12/28/2010 | 91.0  | 0.5 | 13.0 | 15.0 | 11.0 | 8.7  | 101.0 | -1.08 | 0.68  |
| 09MI20-3 | 01/15/2011 | 87.0  | 0.5 | 12.0 | 14.0 | 12.0 | 9.1  | 86.0  | -1.25 | 0.50  |
| 09MI20-3 | 02/17/2011 | 84.0  | 0.5 | 12.0 | 15.0 | 13.0 | 9.1  | 80.0  | -1.47 | 0.80  |
| 09MI20-3 | 03/04/2011 | 83.0  | 0.5 | 12.0 | 15.0 | 13.0 | 9.0  | 78.0  | -1.47 | 0.82  |
| 09MI20-3 | 04/15/2011 | 81.0  | 0.4 | 11.0 | 15.0 | 13.0 | 8.9  | 70.0  | -1.64 | 0.77  |
| 09MI20-3 | 06/02/2011 | 82.0  | 0.5 | 11.0 | 15.0 | 13.0 | 8.8  | 73.0  | -1.48 | 0.87  |
| 09MI20-3 | 07/01/2011 | 81.0  | 0.4 | 11.0 | 15.0 | 14.0 | 8.9  | 70.0  | -1.70 | 0.91  |
| 09MI20-3 | 07/27/2011 | 81.0  | 0.4 | 10.0 | 15.0 | 14.0 | 8.9  | 70.0  | -1.71 | 0.90  |
| 09MI20-3 | 08/12/2011 | 82.0  | 0.5 | 11.0 | 15.0 | 14.0 | 9.0  | 73.0  | -1.57 | 0.95  |
| 09MI20-3 | 09/14/2011 | 83.0  | 0.5 | 11.0 | 15.0 | 13.0 | 8.7  | 72.0  | -1.45 | 0.91  |
| 09MI20-3 | 10/17/2011 | 79.0  | 0.4 | 10.0 | 15.0 | 15.0 | 8.8  | 64.0  | -1.80 | 1.06  |
| 09MI20-3 | 12/14/2011 | 83.0  | 0.4 | 10.0 | 15.0 | 14.0 | 8.6  | 73.0  | -1.61 | 1.00  |
| 09MI20-3 | 02/22/2012 | 80.0  | 0.4 | 10.0 | 15.0 | 15.0 | 8.7  | 64.0  | -1.77 | 1.10  |
| 09MI20-3 | 05/08/2012 | 80.0  | 0.4 | 10.0 | 15.0 | 15.0 | 8.7  | 65.0  | -1.76 | 1.10  |
| 09MI20-3 | 06/11/2012 | 80.0  | 0.4 | 10.0 | 14.0 | 15.0 | 8.8  | 66.0  | -1.69 | 0.90  |
| 09MI20-3 | 08/22/2012 | 84.0  | 0.5 | 11.0 | 14.0 | 14.0 | 9.1  | 75.0  | -1.46 | 0.76  |
| 09MI20-3 | 10/20/2012 | 85.0  | 0.5 | 11.0 | 14.0 | 13.0 | 9.1  | 78.0  | -1.38 | 0.63  |
| 09MI20-3 | 12/04/2012 | 85.0  | 0.5 | 12.0 | 14.0 | 12.0 | 9.0  | 78.0  | -1.29 | 0.53  |
| 09MI20-3 | 02/19/2013 | 93.0  | 0.5 | 13.0 | 13.0 | 9.9  | 9.2  | 99.0  | -0.91 | 0.05  |
| 09MI20-3 | 03/11/2013 | 93.0  | 0.5 | 15.0 | 13.0 | 8.4  | 9.0  | 106.0 | -0.73 | -0.08 |
| 09MI20-3 | 06/18/2013 | 90.0  | 0.5 | 13.0 | 13.0 | 10.0 | 9.8  | 97.0  | -1.08 | -0.13 |
| 09MI20-3 | 09/12/2013 | 86.0  | 0.5 | 12.0 | 14.0 | 11.0 | 10.0 | 87.0  | -1.38 | 0.09  |
| 09MI20-3 | 11/19/2013 | 88.0  | 0.5 | 12.0 | 13.0 | 10.0 | 9.9  | 91.0  | -1.17 | -0.18 |
| 09MI20-3 | 02/13/2014 | 83.0  | 0.5 | 11.0 | 13.0 | 11.0 | 10.0 | 82.0  | -1.36 | -0.09 |
| 09MI20-4 | 10/08/2009 | 151.0 | 0.9 | 39.0 | 9.1  | 5.1  | 6.5  | 269.0 | 2.53  | 0.23  |
| 09MI20-4 | 10/16/2009 | 149.0 | 0.9 | 34.0 | 10.1 | 4.3  | 6.8  | 258.0 | 2.30  | 0.15  |
| 09MI20-4 | 10/26/2009 | 150.0 | 1.0 | 33.0 | 10.5 | 4.6  | 7.0  | 243.0 | 2.27  | 0.25  |
| 09MI20-4 | 11/02/2009 | 144.0 | 1.0 | 31.0 | 11.2 | 5.1  | 7.0  | 233.0 | 2.03  | 0.40  |

|          |            |       |     |      |      |      |     |       |       |      |
|----------|------------|-------|-----|------|------|------|-----|-------|-------|------|
| 09MI20-4 | 11/07/2009 | 142.0 | 1.0 | 30.0 | 11.3 | 5.6  | 7.1 | 227.0 | 1.91  | 0.44 |
| 09MI20-4 | 11/13/2009 | 138.0 | 1.0 | 28.0 | 10.3 | 6.0  | 7.2 | 217.0 | 1.83  | 0.28 |
| 09MI20-4 | 11/19/2009 | 138.0 | 0.9 | 28.0 | 10.8 | 6.1  | 7.3 | 217.0 | 1.65  | 0.27 |
| 09MI20-4 | 11/27/2009 | 136.0 | 0.9 | 27.0 | 11.7 | 6.4  | 7.4 | 209.0 | 1.46  | 0.41 |
| 09MI20-4 | 12/07/2009 | 136.0 | 0.8 | 25.0 | 11.1 | 6.2  | 7.4 | 206.0 | 1.37  | 0.20 |
| 09MI20-4 | 12/14/2009 | 134.0 | 0.9 | 26.0 | 11.7 | 6.9  | 7.7 | 199.0 | 1.29  | 0.37 |
| 09MI20-4 | 12/18/2009 | 133.0 | 0.9 | 25.0 | 11.4 | 6.9  | 7.7 | 196.0 | 1.28  | 0.32 |
| 09MI20-4 | 01/06/2010 | 131.0 | 0.9 | 24.0 | 11.8 | 7.3  | 7.8 | 190.0 | 1.13  | 0.40 |
| 09MI20-4 | 01/15/2010 | 128.0 | 0.9 | 23.0 | 11.5 | 7.5  | 7.8 | 184.0 | 1.07  | 0.36 |
| 09MI20-4 | 01/22/2010 | 125.0 | 0.9 | 23.0 | 12.3 | 7.7  | 8.2 | 180.0 | 0.85  | 0.38 |
| 09MI20-4 | 01/29/2010 | 123.0 | 0.8 | 22.0 | 11.9 | 7.9  | 8.3 | 174.0 | 0.68  | 0.23 |
| 09MI20-4 | 02/12/2010 | 123.0 | 0.8 | 22.0 | 12.0 | 8.2  | 8.4 | 174.0 | 0.63  | 0.26 |
| 09MI20-4 | 02/17/2010 | 118.0 | 0.8 | 21.0 | 12.0 | 8.2  | 8.3 | 167.0 | 0.53  | 0.27 |
| 09MI20-4 | 03/11/2010 | 124.0 | 0.9 | 22.0 | 13.0 | 7.8  | 8.0 | 179.0 | 0.79  | 0.57 |
| 09MI20-4 | 04/27/2010 | 120.0 | 0.8 | 21.0 | 14.0 | 8.6  | 8.2 | 164.0 | 0.36  | 0.69 |
| 09MI20-4 | 05/28/2010 | 116.0 | 0.8 | 20.0 | 14.0 | 9.3  | 8.3 | 157.0 | 0.21  | 0.73 |
| 09MI20-4 | 06/21/2010 | 114.0 | 0.8 | 19.0 | 14.0 | 9.0  | 8.4 | 152.0 | 0.15  | 0.65 |
| 09MI20-4 | 07/26/2010 | 112.0 | 0.8 | 18.0 | 14.0 | 9.3  | 8.8 | 146.0 | -0.01 | 0.55 |
| 09MI20-4 | 08/12/2010 | 113.0 | 0.8 | 19.0 | 14.0 | 9.6  | 9.2 | 148.0 | -0.08 | 0.48 |
| 09MI20-4 | 09/07/2010 | 111.0 | 0.8 | 18.0 | 15.0 | 9.9  | 9.1 | 146.0 | -0.21 | 0.70 |
| 09MI20-4 | 10/04/2010 | 111.0 | 0.8 | 18.0 | 15.0 | 9.6  | 8.9 | 140.0 | -0.18 | 0.72 |
| 09MI20-4 | 12/01/2010 | 108.0 | 0.7 | 17.0 | 15.0 | 11.0 | 8.7 | 130.0 | -0.43 | 0.89 |
| 09MI20-4 | 12/28/2010 | 109.0 | 0.7 | 17.0 | 16.0 | 9.6  | 8.4 | 133.0 | -0.36 | 0.96 |
| 09MI20-4 | 01/15/2011 | 109.0 | 0.7 | 17.0 | 16.0 | 9.9  | 8.8 | 130.0 | -0.47 | 0.87 |
| 09MI20-4 | 02/17/2011 | 108.0 | 0.7 | 17.0 | 15.0 | 9.6  | 8.6 | 130.0 | -0.33 | 0.73 |
| 09MI20-4 | 03/04/2011 | 107.0 | 0.7 | 17.0 | 15.0 | 9.9  | 8.8 | 131.0 | -0.40 | 0.70 |
| 09MI20-4 | 04/15/2011 | 101.0 | 0.7 | 15.0 | 15.0 | 11.0 | 9.0 | 113.0 | -0.68 | 0.76 |
| 09MI20-4 | 06/02/2011 | 101.0 | 0.7 | 15.0 | 15.0 | 11.0 | 8.9 | 114.0 | -0.66 | 0.79 |
| 09MI20-4 | 07/01/2011 | 101.0 | 0.7 | 14.0 | 16.0 | 11.0 | 9.0 | 114.0 | -0.78 | 0.92 |
| 09MI20-4 | 07/27/2011 | 100.0 | 0.7 | 14.0 | 15.0 | 11.0 | 9.0 | 110.0 | -0.72 | 0.75 |
| 09MI20-4 | 08/12/2011 | 100.0 | 0.7 | 14.0 | 15.0 | 11.0 | 9.1 | 111.0 | -0.74 | 0.72 |
| 09MI20-4 | 09/14/2011 | 99.0  | 0.7 | 14.0 | 15.0 | 11.0 | 8.8 | 107.0 | -0.71 | 0.81 |
| 09MI20-4 | 10/17/2011 | 99.0  | 0.7 | 14.0 | 15.0 | 11.0 | 8.9 | 107.0 | -0.73 | 0.78 |
| 09MI20-4 | 12/14/2011 | 100.0 | 0.7 | 14.0 | 16.0 | 11.0 | 8.9 | 107.0 | -0.81 | 0.94 |
| 09MI20-4 | 02/22/2012 | 98.0  | 0.7 | 14.0 | 16.0 | 11.0 | 9.0 | 104.0 | -0.87 | 0.91 |
| 09MI20-4 | 05/08/2012 | 98.0  | 0.7 | 14.0 | 15.0 | 12.0 | 8.9 | 105.0 | -0.81 | 0.91 |
| 09MI20-4 | 06/11/2012 | 98.0  | 0.7 | 14.0 | 15.0 | 12.0 | 8.9 | 108.0 | -0.80 | 0.91 |
| 09MI20-4 | 08/22/2012 | 100.0 | 0.7 | 14.0 | 15.0 | 11.0 | 9.1 | 108.0 | -0.75 | 0.72 |
| 09MI20-4 | 10/20/2012 | 98.0  | 0.7 | 14.0 | 15.0 | 11.0 | 9.1 | 105.0 | -0.79 | 0.71 |
| 09MI20-4 | 12/04/2012 | 102.0 | 0.7 | 15.0 | 15.0 | 10.0 | 8.9 | 113.0 | -0.59 | 0.65 |
| 09MI20-4 | 02/19/2013 | 100.0 | 0.7 | 14.0 | 15.0 | 10.0 | 8.9 | 111.0 | -0.64 | 0.64 |
| 09MI20-4 | 03/11/2013 | 101.0 | 0.7 | 15.0 | 15.0 | 9.9  | 8.9 | 115.0 | -0.59 | 0.64 |
| 09MI20-4 | 06/18/2013 | 107.0 | 0.8 | 17.0 | 13.0 | 8.1  | 8.9 | 135.0 | 0.00  | 0.17 |
| 09MI20-4 | 09/12/2013 | 103.0 | 0.7 | 16.0 | 14.0 | 8.8  | 9.0 | 127.0 | -0.37 | 0.31 |
| 09MI20-4 | 11/19/2013 | 108.0 | 0.7 | 17.0 | 15.0 | 8.2  | 9.0 | 136.0 | -0.31 | 0.42 |
| 09MI20-4 | 02/13/2014 | 101.0 | 0.7 | 15.0 | 14.0 | 8.5  | 8.9 | 119.0 | -0.41 | 0.29 |
| 09MI20-5 | 10/08/2009 | 170.0 | 1.1 | 49.0 | 7.5  | 3.2  | 6.1 | 324.0 | 3.70  | 0.09 |
| 09MI20-5 | 10/16/2009 | 169.0 | 1.1 | 49.0 | 7.6  | 2.9  | 6.2 | 329.0 | 3.69  | 0.04 |
| 09MI20-5 | 10/26/2009 | 172.0 | 1.2 | 48.0 | 8.2  | 3.2  | 6.3 | 312.0 | 3.69  | 0.20 |
| 09MI20-5 | 11/02/2009 | 165.0 | 1.1 | 45.0 | 8.2  | 4.0  | 6.4 | 299.0 | 3.32  | 0.18 |
| 09MI20-5 | 11/07/2009 | 160.0 | 1.1 | 42.0 | 8.3  | 4.6  | 6.5 | 288.0 | 3.11  | 0.21 |
| 09MI20-5 | 11/13/2009 | 154.0 | 1.1 | 39.0 | 7.8  | 5.1  | 6.7 | 278.0 | 2.92  | 0.10 |
| 09MI20-5 | 11/19/2009 | 155.0 | 1.1 | 39.0 | 8.2  | 5.2  | 6.7 | 275.0 | 2.89  | 0.18 |
| 09MI20-5 | 11/27/2009 | 148.0 | 1.0 | 36.0 | 8.8  | 5.6  | 6.8 | 263.0 | 2.49  | 0.19 |
| 09MI20-5 | 12/07/2009 | 149.0 | 1.0 | 34.0 | 8.7  | 6.3  | 7.0 | 249.0 | 2.36  | 0.19 |
| 09MI20-5 | 12/14/2009 | 145.0 | 1.0 | 33.0 | 9.3  | 6.8  | 7.2 | 239.0 | 2.12  | 0.28 |
| 09MI20-5 | 12/18/2009 | 143.0 | 1.0 | 33.0 | 9.2  | 7.1  | 7.3 | 233.0 | 2.04  | 0.27 |
| 09MI20-5 | 01/06/2010 | 136.0 | 1.0 | 29.0 | 10.1 | 8.3  | 7.6 | 210.0 | 1.60  | 0.42 |
| 09MI20-5 | 01/15/2010 | 132.0 | 0.9 | 27.0 | 9.9  | 8.1  | 7.6 | 205.0 | 1.41  | 0.28 |
| 09MI20-5 | 01/22/2010 | 129.0 | 0.9 | 27.0 | 10.5 | 8.7  | 8.0 | 200.0 | 1.18  | 0.33 |

|          |            |       |     |      |      |      |     |       |       |       |
|----------|------------|-------|-----|------|------|------|-----|-------|-------|-------|
| 09MI20-5 | 01/29/2010 | 126.0 | 0.9 | 26.0 | 10.1 | 8.6  | 8.0 | 193.0 | 1.14  | 0.23  |
| 09MI20-5 | 02/04/2010 | 127.0 | 0.9 | 26.0 | 10.0 | 9.1  | 8.1 | 195.0 | 1.12  | 0.26  |
| 09MI20-5 | 02/12/2010 | 125.0 | 0.9 | 25.0 | 10.0 | 9.1  | 8.2 | 186.0 | 1.03  | 0.21  |
| 09MI20-5 | 02/17/2010 | 123.0 | 0.8 | 25.0 | 10.0 | 8.9  | 8.1 | 183.0 | 0.90  | 0.14  |
| 09MI20-5 | 03/11/2010 | 120.0 | 0.8 | 24.0 | 12.0 | 9.9  | 8.1 | 178.0 | 0.58  | 0.59  |
| 09MI20-5 | 04/27/2010 | 116.0 | 0.8 | 22.0 | 12.0 | 10.0 | 8.2 | 166.0 | 0.43  | 0.55  |
| 09MI20-5 | 05/28/2010 | 90.0  | 0.5 | 14.0 | 16.0 | 14.0 | 8.5 | 93.0  | -1.34 | 1.31  |
| 09MI20-5 | 06/21/2010 | 108.0 | 0.7 | 19.0 | 13.0 | 11.0 | 8.6 | 142.0 | -0.16 | 0.61  |
| 09MI20-5 | 07/26/2010 | 99.0  | 0.7 | 16.0 | 14.0 | 13.0 | 9.2 | 116.0 | -0.75 | 0.81  |
| 09MI20-5 | 08/12/2010 | 98.0  | 0.7 | 16.0 | 14.0 | 13.0 | 9.5 | 117.0 | -0.82 | 0.72  |
| 09MI20-5 | 09/07/2010 | 99.0  | 0.7 | 16.0 | 15.0 | 13.0 | 9.4 | 121.0 | -0.87 | 0.92  |
| 09MI20-5 | 10/04/2010 | 97.0  | 0.7 | 15.0 | 15.0 | 13.0 | 9.1 | 109.0 | -0.89 | 0.99  |
| 09MI20-5 | 12/01/2010 | 100.0 | 0.7 | 16.0 | 15.0 | 12.0 | 8.8 | 116.0 | -0.70 | 0.96  |
| 09MI20-5 | 12/28/2010 | 108.0 | 0.7 | 18.0 | 13.0 | 10.0 | 8.2 | 143.0 | -0.03 | 0.59  |
| 09MI20-5 | 01/15/2011 | 104.0 | 0.7 | 17.0 | 12.0 | 11.0 | 8.8 | 127.0 | -0.25 | 0.36  |
| 09MI20-5 | 02/17/2011 | 100.0 | 0.7 | 16.0 | 14.0 | 12.0 | 8.8 | 115.0 | -0.61 | 0.80  |
| 09MI20-5 | 03/04/2011 | 99.0  | 0.7 | 16.0 | 14.0 | 12.0 | 9.0 | 117.0 | -0.65 | 0.74  |
| 09MI20-5 | 04/15/2011 | 94.0  | 0.6 | 14.0 | 14.0 | 13.0 | 9.1 | 99.0  | -1.01 | 0.74  |
| 09MI20-5 | 06/02/2011 | 94.0  | 0.7 | 14.0 | 15.0 | 13.0 | 9.0 | 100.0 | -0.96 | 1.01  |
| 09MI20-5 | 07/01/2011 | 92.0  | 0.6 | 13.0 | 15.0 | 14.0 | 9.1 | 95.0  | -1.22 | 1.03  |
| 09MI20-5 | 07/27/2011 | 91.0  | 0.6 | 13.0 | 15.0 | 14.0 | 9.1 | 91.0  | -1.25 | 1.03  |
| 09MI20-5 | 08/12/2011 | 89.0  | 0.6 | 12.0 | 15.0 | 14.0 | 9.3 | 87.0  | -1.35 | 0.95  |
| 09MI20-5 | 09/14/2011 | 89.0  | 0.6 | 12.0 | 15.0 | 13.0 | 9.0 | 84.0  | -1.24 | 0.91  |
| 09MI20-5 | 10/17/2011 | 87.0  | 0.6 | 12.0 | 15.0 | 14.0 | 9.1 | 82.0  | -1.35 | 1.01  |
| 09MI20-5 | 12/14/2011 | 89.0  | 0.6 | 12.0 | 15.0 | 14.0 | 8.9 | 84.0  | -1.28 | 1.07  |
| 09MI20-5 | 02/22/2012 | 89.0  | 0.6 | 13.0 | 15.0 | 14.0 | 8.9 | 86.0  | -1.26 | 1.08  |
| 09MI20-5 | 05/08/2012 | 92.0  | 0.6 | 13.0 | 15.0 | 13.0 | 8.7 | 95.0  | -1.08 | 1.02  |
| 09MI20-5 | 06/11/2012 | 94.0  | 0.7 | 14.0 | 14.0 | 13.0 | 8.8 | 102.0 | -0.82 | 0.91  |
| 09MI20-5 | 08/22/2012 | 94.0  | 0.6 | 14.0 | 14.0 | 12.0 | 9.1 | 100.0 | -0.95 | 0.61  |
| 09MI20-5 | 10/20/2012 | 95.0  | 0.6 | 14.0 | 14.0 | 12.0 | 9.0 | 104.0 | -0.90 | 0.64  |
| 09MI20-5 | 12/04/2012 | 100.0 | 0.7 | 15.0 | 13.0 | 11.0 | 8.7 | 117.0 | -0.44 | 0.53  |
| 09MI20-5 | 02/19/2013 | 102.0 | 0.7 | 16.0 | 12.0 | 9.6  | 8.7 | 127.0 | -0.19 | 0.19  |
| 09MI20-5 | 03/11/2013 | 105.0 | 0.7 | 17.0 | 11.0 | 8.7  | 8.7 | 138.0 | 0.05  | -0.08 |
| 09MI20-5 | 06/18/2013 | 102.0 | 0.7 | 17.0 | 12.0 | 8.7  | 8.9 | 131.0 | -0.15 | 0.01  |
| 09MI20-5 | 09/12/2013 | 103.0 | 0.7 | 17.0 | 12.0 | 8.7  | 8.9 | 133.0 | -0.13 | 0.01  |
| 09MI20-5 | 11/19/2013 | 104.0 | 0.7 | 17.0 | 12.0 | 8.4  | 8.9 | 136.0 | -0.08 | -0.03 |
| 09MI20-5 | 02/13/2014 | 99.0  | 0.7 | 15.0 | 12.0 | 8.1  | 8.9 | 122.0 | -0.22 | -0.10 |
| 09MI20-6 | 10/08/2009 | 169.0 | 1.2 | 48.0 | 7.3  | 3.7  | 6.1 | 324.0 | 3.78  | 0.19  |
| 09MI20-6 | 10/16/2009 | 171.0 | 1.2 | 47.0 | 8.2  | 3.3  | 6.2 | 328.0 | 3.74  | 0.25  |
| 09MI20-6 | 10/26/2009 | 176.0 | 1.4 | 49.0 | 7.6  | 3.6  | 6.2 | 320.0 | 4.08  | 0.34  |
| 09MI20-6 | 11/02/2009 | 170.0 | 1.3 | 47.0 | 9.1  | 3.3  | 6.1 | 320.0 | 3.75  | 0.49  |
| 09MI20-6 | 11/07/2009 | 158.0 | 1.3 | 43.0 | 7.2  | 4.7  | 6.4 | 289.0 | 3.44  | 0.21  |
| 09MI20-6 | 11/13/2009 | 151.0 | 1.2 | 40.0 | 6.8  | 5.1  | 6.7 | 283.0 | 3.12  | 0.01  |
| 09MI20-6 | 11/19/2009 | 154.0 | 1.2 | 41.0 | 7.2  | 5.2  | 6.7 | 279.0 | 3.12  | 0.09  |
| 09MI20-6 | 11/27/2009 | 151.0 | 1.2 | 39.0 | 7.8  | 5.6  | 6.8 | 269.0 | 2.92  | 0.19  |
| 09MI20-6 | 12/07/2009 | 147.0 | 1.0 | 36.0 | 7.5  | 5.8  | 6.9 | 261.0 | 2.55  | -0.02 |
| 09MI20-6 | 12/14/2009 | 147.0 | 1.2 | 37.0 | 8.1  | 6.2  | 7.1 | 254.0 | 2.66  | 0.20  |
| 09MI20-6 | 12/18/2009 | 146.0 | 1.2 | 37.0 | 7.9  | 6.5  | 7.2 | 250.0 | 2.60  | 0.18  |
| 09MI20-6 | 01/06/2010 | 140.0 | 1.1 | 34.0 | 8.4  | 6.9  | 7.4 | 236.0 | 2.21  | 0.14  |
| 09MI20-6 | 01/15/2010 | 147.0 | 1.1 | 33.0 | 9.8  | 6.4  | 7.1 | 243.0 | 2.29  | 0.41  |
| 09MI20-6 | 01/22/2010 | 135.0 | 1.1 | 32.0 | 9.0  | 7.4  | 7.8 | 222.0 | 1.90  | 0.15  |
| 09MI20-6 | 01/29/2010 | 132.0 | 1.0 | 31.0 | 8.7  | 7.5  | 7.9 | 216.0 | 1.70  | 0.01  |
| 09MI20-6 | 02/04/2010 | 132.0 | 1.0 | 31.0 | 8.7  | 7.9  | 7.9 | 218.0 | 1.68  | 0.06  |
| 09MI20-6 | 02/12/2010 | 131.0 | 1.0 | 30.0 | 8.7  | 7.7  | 8.0 | 213.0 | 1.63  | 0.00  |
| 09MI20-6 | 02/17/2010 | 128.0 | 1.0 | 29.0 | 8.7  | 7.4  | 7.9 | 209.0 | 1.60  | -0.03 |
| 09MI20-6 | 03/11/2010 | 132.0 | 1.0 | 28.0 | 11.0 | 8.4  | 7.7 | 209.0 | 1.42  | 0.55  |
| 09MI20-6 | 04/27/2010 | 126.0 | 0.9 | 29.0 | 9.9  | 8.3  | 7.9 | 202.0 | 1.26  | 0.22  |
| 09MI20-6 | 05/28/2010 | 125.0 | 0.9 | 26.0 | 12.0 | 8.8  | 8.0 | 193.0 | 0.93  | 0.57  |
| 09MI20-6 | 06/21/2010 | 124.0 | 0.9 | 27.0 | 10.0 | 8.1  | 8.1 | 195.0 | 1.14  | 0.12  |
| 09MI20-6 | 07/26/2010 | 121.0 | 0.8 | 26.0 | 10.0 | 8.5  | 8.5 | 188.0 | 0.84  | -0.03 |

|          |            |       |     |      |      |      |     |       |       |       |
|----------|------------|-------|-----|------|------|------|-----|-------|-------|-------|
| 09MI20-6 | 08/12/2010 | 118.0 | 0.8 | 25.0 | 11.0 | 9.3  | 9.1 | 179.0 | 0.50  | 0.04  |
| 09MI20-6 | 09/07/2010 | 121.0 | 0.8 | 27.0 | 11.0 | 8.6  | 8.7 | 193.0 | 0.73  | 0.09  |
| 09MI20-6 | 10/04/2010 | 118.0 | 0.8 | 25.0 | 11.0 | 8.7  | 8.5 | 178.0 | 0.64  | 0.14  |
| 09MI20-6 | 12/01/2010 | 119.0 | 0.8 | 25.0 | 11.0 | 9.2  | 8.3 | 176.0 | 0.66  | 0.27  |
| 09MI20-6 | 12/28/2010 | 114.0 | 0.8 | 22.0 | 13.0 | 8.9  | 8.3 | 161.0 | 0.33  | 0.52  |
| 09MI20-6 | 01/15/2011 | 117.0 | 0.8 | 23.0 | 13.0 | 8.7  | 8.5 | 168.0 | 0.38  | 0.45  |
| 09MI20-6 | 02/17/2011 | 116.0 | 0.8 | 23.0 | 12.0 | 8.6  | 8.3 | 166.0 | 0.50  | 0.33  |
| 09MI20-6 | 03/04/2011 | 116.0 | 0.8 | 23.0 | 12.0 | 8.6  | 8.5 | 170.0 | 0.47  | 0.27  |
| 09MI20-6 | 04/15/2011 | 112.0 | 0.8 | 22.0 | 12.0 | 9.0  | 8.6 | 156.0 | 0.31  | 0.27  |
| 09MI20-6 | 06/02/2011 | 110.0 | 0.8 | 21.0 | 12.0 | 10.0 | 8.6 | 149.0 | 0.18  | 0.40  |
| 09MI20-6 | 07/01/2011 | 113.0 | 0.8 | 22.0 | 12.0 | 9.9  | 8.6 | 160.0 | 0.29  | 0.40  |
| 09MI20-6 | 07/27/2011 | 113.0 | 0.7 | 23.0 | 12.0 | 9.5  | 8.5 | 161.0 | 0.22  | 0.32  |
| 09MI20-6 | 08/12/2011 | 112.0 | 0.8 | 22.0 | 12.0 | 9.6  | 8.6 | 160.0 | 0.29  | 0.36  |
| 09MI20-6 | 09/14/2011 | 114.0 | 0.8 | 23.0 | 12.0 | 9.2  | 8.3 | 161.0 | 0.42  | 0.41  |
| 09MI20-6 | 10/17/2011 | 111.0 | 0.8 | 22.0 | 12.0 | 10.0 | 8.4 | 157.0 | 0.28  | 0.47  |
| 09MI20-6 | 12/14/2011 | 109.0 | 0.7 | 20.0 | 13.0 | 11.0 | 8.6 | 144.0 | -0.13 | 0.62  |
| 09MI20-6 | 02/22/2012 | 112.0 | 0.8 | 22.0 | 12.0 | 9.7  | 8.4 | 157.0 | 0.31  | 0.43  |
| 09MI20-6 | 05/08/2012 | 113.0 | 0.8 | 22.0 | 12.0 | 9.7  | 8.4 | 158.0 | 0.33  | 0.44  |
| 09MI20-6 | 06/11/2012 | 114.0 | 0.8 | 23.0 | 11.0 | 9.4  | 8.3 | 166.0 | 0.52  | 0.27  |
| 09MI20-6 | 08/22/2012 | 112.0 | 0.8 | 22.0 | 12.0 | 9.4  | 8.6 | 156.0 | 0.29  | 0.33  |
| 09MI20-6 | 10/20/2012 | 105.0 | 0.7 | 18.0 | 14.0 | 11.0 | 9.1 | 129.0 | -0.46 | 0.60  |
| 09MI20-6 | 12/04/2012 | 111.0 | 0.9 | 20.0 | 12.0 | 8.9  | 8.7 | 150.0 | 0.35  | 0.28  |
| 09MI20-6 | 02/19/2013 | 107.0 | 0.9 | 18.0 | 14.0 | 9.5  | 8.9 | 133.0 | -0.05 | 0.60  |
| 09MI20-6 | 03/11/2013 | 104.0 | 0.8 | 16.0 | 14.0 | 10.0 | 9.0 | 123.0 | -0.32 | 0.54  |
| 09MI20-6 | 06/18/2013 | 106.0 | 0.8 | 17.0 | 14.0 | 9.1  | 8.9 | 131.0 | -0.18 | 0.47  |
| 09MI20-6 | 09/12/2013 | 115.0 | 0.8 | 22.0 | 11.0 | 6.8  | 8.7 | 166.0 | 0.59  | -0.21 |
| 09MI20-6 | 11/19/2013 | 108.0 | 0.8 | 17.0 | 14.0 | 8.4  | 8.9 | 136.0 | -0.09 | 0.38  |
| 09MI20-6 | 02/13/2014 | 105.0 | 0.8 | 16.0 | 14.0 | 8.3  | 8.8 | 128.0 | -0.15 | 0.38  |
| 10MI26-1 | 01/15/2011 | 121.0 | 0.8 | 18.0 | 13.0 | 6.2  | 8.4 | 164.0 | 0.54  | 0.12  |
| 10MI26-1 | 01/23/2011 | 119.0 | 0.8 | 18.0 | 13.0 | 6.2  | 8.6 | 160.0 | 0.46  | 0.05  |
| 10MI26-1 | 02/04/2011 | 119.0 | 0.8 | 18.0 | 13.0 | 6.2  | 8.4 | 165.0 | 0.51  | 0.11  |
| 10MI26-1 | 02/09/2011 | 119.0 | 0.8 | 18.0 | 12.0 | 6.4  | 8.5 | 160.0 | 0.56  | -0.06 |
| 10MI26-1 | 02/17/2011 | 119.0 | 0.8 | 18.0 | 12.0 | 6.3  | 8.3 | 160.0 | 0.60  | -0.01 |
| 10MI26-1 | 02/25/2011 | 117.0 | 0.8 | 18.0 | 12.0 | 6.4  | 8.5 | 157.0 | 0.51  | -0.06 |
| 10MI26-1 | 03/01/2011 | 118.0 | 0.8 | 18.0 | 13.0 | 6.4  | 8.5 | 158.0 | 0.44  | 0.10  |
| 10MI26-1 | 03/04/2011 | 119.0 | 0.8 | 18.0 | 13.0 | 6.4  | 8.5 | 159.0 | 0.46  | 0.11  |
| 10MI26-1 | 04/21/2011 | 115.0 | 0.8 | 17.0 | 13.0 | 6.6  | 8.6 | 151.0 | 0.33  | 0.08  |
| 10MI26-1 | 05/27/2011 | 115.0 | 0.8 | 17.0 | 13.0 | 6.9  | 8.5 | 152.0 | 0.33  | 0.16  |
| 10MI26-1 | 07/01/2011 | 116.0 | 0.7 | 17.0 | 13.0 | 7.1  | 8.6 | 155.0 | 0.21  | 0.09  |
| 10MI26-1 | 07/27/2011 | 117.0 | 0.8 | 17.0 | 13.0 | 6.6  | 8.5 | 155.0 | 0.39  | 0.12  |
| 10MI26-1 | 08/12/2011 | 117.0 | 0.8 | 17.0 | 13.0 | 6.2  | 8.3 | 152.0 | 0.44  | 0.13  |
| 10MI26-1 | 09/14/2011 | 118.0 | 0.8 | 18.0 | 13.0 | 6.4  | 8.3 | 155.0 | 0.47  | 0.16  |
| 10MI26-1 | 10/06/2011 | 118.0 | 0.8 | 18.0 | 13.0 | 6.6  | 8.4 | 158.0 | 0.45  | 0.16  |
| 10MI26-1 | 11/29/2011 | 118.0 | 0.8 | 17.0 | 13.0 | 6.3  | 8.3 | 158.0 | 0.47  | 0.15  |
| 10MI26-1 | 12/12/2011 | 118.0 | 0.8 | 17.0 | 13.0 | 6.4  | 8.2 | 157.0 | 0.48  | 0.19  |
| 10MI26-1 | 01/27/2012 | 118.0 | 0.8 | 17.0 | 14.0 | 6.6  | 8.3 | 156.0 | 0.36  | 0.35  |
| 10MI26-1 | 03/02/2012 | 117.0 | 0.8 | 17.0 | 13.0 | 6.7  | 8.5 | 156.0 | 0.39  | 0.14  |
| 10MI26-1 | 05/08/2012 | 117.0 | 0.8 | 17.0 | 13.0 | 6.9  | 8.4 | 155.0 | 0.39  | 0.19  |
| 10MI26-1 | 05/29/2012 | 117.0 | 0.8 | 17.0 | 13.0 | 7.4  | 8.4 | 156.0 | 0.37  | 0.26  |
| 10MI26-1 | 06/11/2012 | 118.0 | 0.8 | 18.0 | 14.0 | 6.7  | 8.5 | 156.0 | 0.32  | 0.31  |
| 10MI26-1 | 07/18/2012 | 118.0 | 0.8 | 18.0 | 13.0 | 6.8  | 8.5 | 157.0 | 0.41  | 0.16  |
| 10MI26-1 | 08/22/2012 | 118.0 | 0.8 | 18.0 | 13.0 | 7.2  | 8.7 | 154.0 | 0.34  | 0.15  |
| 10MI26-1 | 09/26/2012 | 119.0 | 0.8 | 18.0 | 14.0 | 6.7  | 8.5 | 154.0 | 0.33  | 0.31  |
| 10MI26-1 | 10/17/2012 | 116.0 | 0.8 | 17.0 | 14.0 | 7.5  | 8.7 | 150.0 | 0.17  | 0.34  |
| 10MI26-1 | 11/16/2012 | 115.0 | 0.7 | 17.0 | 14.0 | 7.6  | 8.5 | 146.0 | 0.06  | 0.34  |
| 10MI26-1 | 12/05/2012 | 113.0 | 0.7 | 17.0 | 13.0 | 7.6  | 8.7 | 143.0 | 0.07  | 0.11  |
| 10MI26-1 | 02/20/2013 | 110.0 | 0.7 | 16.0 | 14.0 | 8.4  | 8.8 | 134.0 | -0.18 | 0.34  |
| 10MI26-1 | 03/11/2013 | 108.0 | 0.7 | 16.0 | 14.0 | 8.9  | 8.9 | 132.0 | -0.26 | 0.37  |
| 10MI26-1 | 06/17/2013 | 100.0 | 0.6 | 13.0 | 13.0 | 11.0 | 9.3 | 115.0 | -0.71 | 0.26  |
| 10MI26-1 | 09/11/2013 | 98.0  | 0.6 | 13.0 | 13.0 | 11.0 | 9.4 | 112.0 | -0.77 | 0.22  |

|          |            |       |     |      |      |      |     |       |       |      |
|----------|------------|-------|-----|------|------|------|-----|-------|-------|------|
| 10MI26-1 | 11/20/2013 | 100.0 | 0.6 | 13.0 | 14.0 | 11.0 | 9.5 | 111.0 | -0.85 | 0.36 |
| 10MI26-1 | 02/14/2014 | 91.0  | 0.6 | 11.0 | 14.0 | 13.0 | 9.6 | 91.0  | -1.22 | 0.56 |
| 10MI26-3 | 01/15/2011 | 124.0 | 0.9 | 19.0 | 14.0 | 6.5  | 8.5 | 167.0 | 0.60  | 0.37 |
| 10MI26-3 | 01/23/2011 | 123.0 | 0.8 | 19.0 | 14.0 | 6.4  | 8.6 | 165.0 | 0.44  | 0.26 |
| 10MI26-3 | 02/04/2011 | 123.0 | 0.9 | 19.0 | 14.0 | 6.3  | 8.4 | 170.0 | 0.62  | 0.38 |
| 10MI26-3 | 02/09/2011 | 122.0 | 0.9 | 19.0 | 13.0 | 6.5  | 8.5 | 165.0 | 0.65  | 0.20 |
| 10MI26-3 | 02/17/2011 | 123.0 | 0.9 | 19.0 | 13.0 | 6.1  | 8.4 | 166.0 | 0.71  | 0.18 |
| 10MI26-3 | 02/25/2011 | 123.0 | 0.8 | 19.0 | 13.0 | 6.1  | 8.4 | 167.0 | 0.60  | 0.11 |
| 10MI26-3 | 03/01/2011 | 123.0 | 0.9 | 19.0 | 14.0 | 6.1  | 8.5 | 168.0 | 0.61  | 0.32 |
| 10MI26-3 | 03/04/2011 | 124.0 | 0.9 | 19.0 | 13.0 | 6.1  | 8.5 | 169.0 | 0.72  | 0.15 |
| 10MI26-3 | 04/21/2011 | 122.0 | 0.8 | 19.0 | 13.0 | 6.1  | 8.5 | 166.0 | 0.56  | 0.08 |
| 10MI26-3 | 05/27/2011 | 121.0 | 0.8 | 18.0 | 13.0 | 6.5  | 8.4 | 165.0 | 0.53  | 0.16 |
| 10MI26-3 | 07/01/2011 | 122.0 | 0.8 | 18.0 | 13.0 | 6.2  | 8.6 | 166.0 | 0.52  | 0.06 |
| 10MI26-3 | 07/27/2011 | 121.0 | 0.8 | 18.0 | 13.0 | 6.2  | 8.5 | 165.0 | 0.52  | 0.09 |
| 10MI26-3 | 08/12/2011 | 121.0 | 0.8 | 18.0 | 13.0 | 6.0  | 8.4 | 161.0 | 0.54  | 0.09 |
| 10MI26-3 | 09/14/2011 | 121.0 | 0.8 | 18.0 | 13.0 | 6.2  | 8.5 | 160.0 | 0.50  | 0.08 |
| 10MI26-3 | 10/06/2011 | 118.0 | 0.8 | 18.0 | 13.0 | 7.1  | 8.8 | 156.0 | 0.33  | 0.10 |
| 10MI26-3 | 11/29/2011 | 119.0 | 0.8 | 17.0 | 13.0 | 6.7  | 8.5 | 159.0 | 0.43  | 0.14 |
| 10MI26-3 | 12/12/2011 | 119.0 | 0.8 | 17.0 | 13.0 | 6.8  | 8.5 | 157.0 | 0.42  | 0.15 |
| 10MI26-3 | 01/27/2012 | 121.0 | 0.8 | 18.0 | 14.0 | 6.5  | 8.4 | 161.0 | 0.42  | 0.32 |
| 10MI26-3 | 03/02/2012 | 119.0 | 0.8 | 18.0 | 13.0 | 6.6  | 8.6 | 159.0 | 0.43  | 0.10 |
| 10MI26-3 | 05/08/2012 | 118.0 | 0.8 | 17.0 | 13.0 | 7.0  | 8.6 | 155.0 | 0.36  | 0.15 |
| 10MI26-3 | 05/29/2012 | 118.0 | 0.8 | 17.0 | 13.0 | 7.1  | 8.6 | 155.0 | 0.36  | 0.16 |
| 10MI26-3 | 06/11/2012 | 121.0 | 0.9 | 18.0 | 13.0 | 6.6  | 8.5 | 162.0 | 0.61  | 0.21 |
| 10MI26-3 | 07/18/2012 | 120.0 | 0.8 | 18.0 | 13.0 | 6.8  | 8.6 | 161.0 | 0.44  | 0.13 |
| 10MI26-3 | 08/22/2012 | 111.0 | 0.8 | 16.0 | 14.0 | 8.9  | 9.2 | 132.0 | -0.16 | 0.35 |
| 10MI26-3 | 09/26/2012 | 109.0 | 0.8 | 15.0 | 14.0 | 9.5  | 9.1 | 127.0 | -0.23 | 0.45 |
| 10MI26-3 | 10/17/2012 | 109.0 | 0.8 | 15.0 | 14.0 | 9.8  | 9.2 | 127.0 | -0.27 | 0.46 |
| 10MI26-3 | 11/16/2012 | 105.0 | 0.7 | 14.0 | 16.0 | 11.0 | 9.0 | 115.0 | -0.72 | 0.93 |
| 10MI26-3 | 12/05/2012 | 105.0 | 0.7 | 14.0 | 15.0 | 10.0 | 9.2 | 115.0 | -0.61 | 0.56 |
| 10MI26-3 | 02/20/2013 | 105.0 | 0.7 | 14.0 | 16.0 | 10.0 | 9.1 | 114.0 | -0.69 | 0.76 |
| 10MI26-3 | 03/11/2013 | 105.0 | 0.7 | 15.0 | 16.0 | 10.0 | 9.0 | 118.0 | -0.64 | 0.80 |
| 10MI26-3 | 06/17/2013 | 100.0 | 0.7 | 13.0 | 16.0 | 11.0 | 9.3 | 107.0 | -0.89 | 0.81 |
| 10MI26-3 | 09/11/2013 | 99.0  | 0.7 | 13.0 | 16.0 | 11.0 | 9.3 | 105.0 | -0.92 | 0.81 |
| 10MI26-3 | 11/20/2013 | 97.0  | 0.7 | 12.0 | 16.0 | 12.0 | 9.4 | 97.0  | -1.06 | 0.90 |
| 10MI26-3 | 02/14/2014 | 98.0  | 0.7 | 13.0 | 16.0 | 11.0 | 9.0 | 101.0 | -0.89 | 0.90 |
| 10MI26-4 | 01/15/2011 | 97.0  | 0.6 | 14.0 | 15.0 | 11.0 | 9.1 | 106.0 | -0.92 | 0.64 |
| 10MI26-4 | 01/23/2011 | 97.0  | 0.6 | 14.0 | 14.0 | 11.0 | 9.1 | 109.0 | -0.82 | 0.48 |
| 10MI26-4 | 02/04/2011 | 99.0  | 0.6 | 15.0 | 14.0 | 10.0 | 8.9 | 118.0 | -0.64 | 0.42 |
| 10MI26-4 | 02/09/2011 | 99.0  | 0.6 | 15.0 | 13.0 | 11.0 | 9.0 | 113.0 | -0.65 | 0.36 |
| 10MI26-4 | 02/17/2011 | 100.0 | 0.6 | 15.0 | 13.0 | 10.0 | 8.7 | 117.0 | -0.50 | 0.32 |
| 10MI26-4 | 02/25/2011 | 101.0 | 0.6 | 16.0 | 13.0 | 10.0 | 8.8 | 121.0 | -0.48 | 0.30 |
| 10MI26-4 | 03/01/2011 | 100.0 | 0.6 | 15.0 | 14.0 | 10.0 | 8.9 | 119.0 | -0.63 | 0.42 |
| 10MI26-4 | 03/04/2011 | 101.0 | 0.6 | 16.0 | 13.0 | 10.0 | 8.9 | 122.0 | -0.50 | 0.27 |
| 10MI26-4 | 04/21/2011 | 110.0 | 0.7 | 19.0 | 12.0 | 8.6  | 8.4 | 147.0 | 0.16  | 0.19 |
| 10MI26-4 | 05/27/2011 | 102.0 | 0.7 | 15.0 | 13.0 | 9.7  | 8.8 | 125.0 | -0.32 | 0.33 |
| 10MI26-4 | 07/01/2011 | 100.0 | 0.6 | 15.0 | 13.0 | 9.9  | 9.0 | 119.0 | -0.55 | 0.21 |
| 10MI26-4 | 07/27/2011 | 100.0 | 0.6 | 15.0 | 13.0 | 9.8  | 8.9 | 119.0 | -0.52 | 0.23 |
| 10MI26-4 | 08/12/2011 | 101.0 | 0.7 | 15.0 | 13.0 | 9.5  | 8.7 | 117.0 | -0.34 | 0.32 |
| 10MI26-4 | 09/14/2011 | 98.0  | 0.7 | 14.0 | 13.0 | 10.0 | 8.9 | 112.0 | -0.48 | 0.31 |
| 10MI26-4 | 10/06/2011 | 96.0  | 0.6 | 14.0 | 13.0 | 11.0 | 9.1 | 108.0 | -0.74 | 0.31 |
| 10MI26-4 | 11/29/2011 | 98.0  | 0.6 | 14.0 | 13.0 | 10.0 | 8.8 | 112.0 | -0.58 | 0.28 |
| 10MI26-4 | 12/12/2011 | 95.0  | 0.6 | 13.0 | 14.0 | 11.0 | 8.9 | 105.0 | -0.83 | 0.53 |
| 10MI26-4 | 01/27/2012 | 99.0  | 0.6 | 14.0 | 14.0 | 10.0 | 8.8 | 114.0 | -0.65 | 0.44 |
| 10MI26-4 | 02/22/2012 | 96.0  | 0.6 | 14.0 | 14.0 | 11.0 | 8.9 | 105.0 | -0.81 | 0.54 |
| 10MI26-4 | 03/02/2012 | 95.0  | 0.6 | 13.0 | 14.0 | 11.0 | 9.1 | 106.0 | -0.87 | 0.47 |
| 10MI26-4 | 05/08/2012 | 94.0  | 0.6 | 13.0 | 13.0 | 11.0 | 9.0 | 100.0 | -0.79 | 0.33 |
| 10MI26-4 | 05/29/2012 | 93.0  | 0.6 | 12.0 | 14.0 | 12.0 | 9.0 | 99.0  | -0.97 | 0.62 |
| 10MI26-4 | 06/11/2012 | 95.0  | 0.7 | 13.0 | 14.0 | 11.0 | 9.2 | 102.0 | -0.78 | 0.50 |
| 10MI26-4 | 07/18/2012 | 92.0  | 0.6 | 13.0 | 13.0 | 12.0 | 9.0 | 98.0  | -0.89 | 0.46 |

|          |            |       |     |      |      |      |     |       |       |      |
|----------|------------|-------|-----|------|------|------|-----|-------|-------|------|
| 10MI26-4 | 08/22/2012 | 89.0  | 0.6 | 12.0 | 15.0 | 14.0 | 9.4 | 83.0  | -1.38 | 0.92 |
| 10MI26-4 | 09/26/2012 | 87.0  | 0.6 | 11.0 | 15.0 | 14.0 | 9.3 | 79.0  | -1.42 | 0.94 |
| 10MI26-4 | 10/17/2012 | 86.0  | 0.5 | 11.0 | 15.0 | 15.0 | 9.3 | 76.0  | -1.62 | 1.00 |
| 10MI26-4 | 11/16/2012 | 89.0  | 0.6 | 12.0 | 15.0 | 14.0 | 9.1 | 82.0  | -1.32 | 1.01 |
| 10MI26-4 | 12/05/2012 | 88.0  | 0.6 | 12.0 | 15.0 | 14.0 | 9.3 | 82.0  | -1.38 | 0.95 |
| 10MI26-4 | 02/20/2013 | 105.0 | 0.7 | 14.0 | 16.0 | 10.0 | 9.1 | 114.0 | -0.69 | 0.76 |
| 10MI26-4 | 03/11/2013 | 105.0 | 0.7 | 15.0 | 16.0 | 10.0 | 9.0 | 118.0 | -0.64 | 0.80 |
| 10MI26-4 | 06/17/2013 | 87.0  | 0.6 | 11.0 | 14.0 | 13.0 | 9.4 | 85.0  | -1.26 | 0.61 |
| 10MI26-4 | 09/11/2013 | 85.0  | 0.5 | 11.0 | 15.0 | 14.0 | 9.4 | 80.0  | -1.58 | 0.84 |
| 10MI26-4 | 11/20/2013 | 87.0  | 0.5 | 11.0 | 15.0 | 13.0 | 9.3 | 84.0  | -1.46 | 0.74 |
| 10MI26-4 | 02/14/2014 | 94.0  | 0.7 | 13.0 | 13.0 | 10.0 | 9.3 | 103.0 | -0.66 | 0.17 |
| 10MI26-5 | 01/15/2011 | 108.0 | 0.7 | 22.0 | 12.0 | 10.0 | 8.4 | 148.0 | 0.08  | 0.39 |
| 10MI26-5 | 01/23/2011 | 108.0 | 0.7 | 22.0 | 12.0 | 10.0 | 8.4 | 150.0 | 0.09  | 0.39 |
| 10MI26-5 | 02/04/2011 | 111.0 | 0.7 | 23.0 | 12.0 | 9.5  | 8.2 | 162.0 | 0.26  | 0.41 |
| 10MI26-5 | 02/09/2011 | 112.0 | 0.7 | 24.0 | 11.0 | 9.7  | 8.3 | 159.0 | 0.33  | 0.24 |
| 10MI26-5 | 02/17/2011 | 113.0 | 0.7 | 24.0 | 11.0 | 9.3  | 8.1 | 162.0 | 0.42  | 0.26 |
| 10MI26-5 | 02/25/2011 | 116.0 | 0.7 | 26.0 | 11.0 | 8.9  | 8.0 | 172.0 | 0.57  | 0.25 |
| 10MI26-5 | 03/01/2011 | 116.0 | 0.7 | 25.0 | 11.0 | 9.1  | 8.0 | 171.0 | 0.54  | 0.28 |
| 10MI26-5 | 03/04/2011 | 116.0 | 0.7 | 26.0 | 11.0 | 9.0  | 8.1 | 173.0 | 0.55  | 0.24 |
| 10MI26-5 | 04/21/2011 | 125.0 | 0.8 | 29.0 | 9.4  | 7.8  | 7.7 | 202.0 | 1.24  | 0.06 |
| 10MI26-5 | 05/27/2011 | 113.0 | 0.7 | 24.0 | 11.0 | 8.8  | 8.0 | 169.0 | 0.50  | 0.22 |
| 10MI26-5 | 07/01/2011 | 108.0 | 0.7 | 22.0 | 11.0 | 10.0 | 8.4 | 154.0 | 0.20  | 0.23 |
| 10MI26-5 | 07/27/2011 | 107.0 | 0.6 | 21.0 | 11.0 | 9.8  | 8.4 | 150.0 | 0.05  | 0.13 |
| 10MI26-5 | 08/12/2011 | 107.0 | 0.7 | 21.0 | 11.0 | 9.4  | 8.2 | 146.0 | 0.21  | 0.20 |
| 10MI26-5 | 09/14/2011 | 108.0 | 0.7 | 22.0 | 11.0 | 9.4  | 8.2 | 150.0 | 0.25  | 0.21 |
| 10MI26-5 | 10/06/2011 | 109.0 | 0.7 | 22.0 | 10.0 | 9.9  | 8.4 | 153.0 | 0.31  | 0.06 |
| 10MI26-5 | 11/29/2011 | 105.0 | 0.6 | 20.0 | 11.0 | 10.0 | 8.3 | 143.0 | -0.01 | 0.17 |
| 10MI26-5 | 12/12/2011 | 106.0 | 0.6 | 20.0 | 11.0 | 10.0 | 8.2 | 144.0 | 0.03  | 0.20 |
| 10MI26-5 | 01/27/2012 | 106.0 | 0.6 | 20.0 | 12.0 | 10.0 | 8.2 | 144.0 | -0.07 | 0.37 |
| 10MI26-5 | 02/22/2012 | 103.0 | 0.6 | 19.0 | 12.0 | 10.0 | 8.4 | 137.0 | -0.19 | 0.29 |
| 10MI26-5 | 03/02/2012 | 103.0 | 0.6 | 19.0 | 12.0 | 11.0 | 8.6 | 136.0 | -0.29 | 0.37 |
| 10MI26-5 | 05/08/2012 | 98.0  | 0.6 | 17.0 | 12.0 | 11.0 | 8.7 | 120.0 | -0.46 | 0.30 |
| 10MI26-5 | 05/29/2012 | 97.0  | 0.6 | 16.0 | 12.0 | 11.0 | 8.7 | 119.0 | -0.49 | 0.29 |
| 10MI26-5 | 06/11/2012 | 98.0  | 0.6 | 17.0 | 12.0 | 12.0 | 8.7 | 120.0 | -0.52 | 0.44 |
| 10MI26-5 | 07/18/2012 | 97.0  | 0.6 | 16.0 | 12.0 | 12.0 | 8.8 | 116.0 | -0.58 | 0.40 |
| 10MI26-5 | 08/22/2012 | 88.0  | 0.5 | 13.0 | 13.0 | 14.0 | 9.2 | 89.0  | -1.26 | 0.59 |
| 10MI26-5 | 09/26/2012 | 85.0  | 0.5 | 12.0 | 14.0 | 15.0 | 9.2 | 80.0  | -1.50 | 0.88 |
| 10MI26-5 | 10/17/2012 | 85.0  | 0.5 | 12.0 | 14.0 | 16.0 | 9.2 | 78.0  | -1.56 | 1.01 |
| 10MI26-5 | 11/16/2012 | 85.0  | 0.5 | 12.0 | 14.0 | 15.0 | 8.9 | 77.0  | -1.45 | 0.97 |
| 10MI26-5 | 12/05/2012 | 85.0  | 0.5 | 12.0 | 14.0 | 14.0 | 9.2 | 80.0  | -1.44 | 0.74 |
| 10MI26-5 | 02/20/2013 | 89.0  | 0.5 | 13.0 | 13.0 | 13.0 | 8.9 | 91.0  | -1.12 | 0.55 |
| 10MI26-5 | 03/11/2013 | 90.0  | 0.5 | 14.0 | 13.0 | 13.0 | 8.8 | 100.0 | -1.04 | 0.60 |
| 10MI26-5 | 06/17/2013 | 86.0  | 0.5 | 12.0 | 13.0 | 13.0 | 9.2 | 88.0  | -1.24 | 0.45 |
| 10MI26-5 | 09/11/2013 | 85.0  | 0.5 | 12.0 | 14.0 | 13.0 | 9.2 | 84.0  | -1.37 | 0.60 |
| 10MI26-5 | 11/20/2013 | 86.0  | 0.5 | 12.0 | 14.0 | 13.0 | 9.2 | 87.0  | -1.34 | 0.61 |
| 10MI26-5 | 02/14/2014 | 87.0  | 0.5 | 12.0 | 13.0 | 12.0 | 9.1 | 90.0  | -1.14 | 0.34 |
| 10MI26-6 | 01/15/2011 | 152.0 | 0.9 | 56.0 | 7.8  | 6.9  | 6.6 | 297.0 | 2.82  | 0.34 |
| 10MI26-6 | 01/23/2011 | 154.0 | 0.9 | 57.0 | 7.7  | 6.4  | 6.6 | 303.0 | 2.93  | 0.27 |
| 10MI26-6 | 02/04/2011 | 156.0 | 0.9 | 59.0 | 7.6  | 6.1  | 6.4 | 316.0 | 3.09  | 0.30 |
| 10MI26-6 | 02/09/2011 | 158.0 | 0.9 | 60.0 | 7.0  | 6.1  | 6.4 | 316.0 | 3.19  | 0.21 |
| 10MI26-6 | 02/17/2011 | 160.0 | 0.9 | 62.0 | 7.0  | 5.7  | 6.2 | 324.0 | 3.33  | 0.24 |
| 10MI26-6 | 02/25/2011 | 163.0 | 0.9 | 64.0 | 6.7  | 5.4  | 6.2 | 335.0 | 3.48  | 0.17 |
| 10MI26-6 | 03/01/2011 | 164.0 | 1.0 | 65.0 | 7.3  | 5.5  | 6.2 | 336.0 | 3.57  | 0.36 |
| 10MI26-6 | 03/04/2011 | 163.0 | 0.9 | 65.0 | 6.8  | 5.4  | 6.2 | 334.0 | 3.48  | 0.19 |
| 10MI26-6 | 04/21/2011 | 157.0 | 0.9 | 59.0 | 6.6  | 5.6  | 6.4 | 320.0 | 3.24  | 0.07 |
| 10MI26-6 | 05/27/2011 | 152.0 | 0.9 | 56.0 | 7.0  | 6.5  | 6.4 | 306.0 | 2.99  | 0.23 |
| 10MI26-6 | 07/01/2011 | 151.0 | 0.9 | 56.0 | 7.2  | 6.7  | 6.6 | 303.0 | 2.90  | 0.22 |
| 10MI26-6 | 07/27/2011 | 152.0 | 0.9 | 58.0 | 7.1  | 6.3  | 6.5 | 308.0 | 3.01  | 0.20 |
| 10MI26-6 | 08/12/2011 | 154.0 | 0.9 | 59.0 | 7.0  | 5.9  | 6.2 | 310.0 | 3.15  | 0.23 |
| 10MI26-6 | 09/14/2011 | 157.0 | 0.9 | 62.0 | 6.7  | 5.6  | 6.3 | 322.0 | 3.29  | 0.14 |



|          |            |       |     |      |      |      |      |       |       |       |
|----------|------------|-------|-----|------|------|------|------|-------|-------|-------|
| 10MI26-6 | 10/06/2011 | 159.0 | 0.9 | 64.0 | 6.3  | 6.1  | 6.3  | 332.0 | 3.39  | 0.16  |
| 10MI26-6 | 11/29/2011 | 158.0 | 0.9 | 64.0 | 6.4  | 6.1  | 6.2  | 331.0 | 3.38  | 0.21  |
| 10MI26-6 | 12/12/2011 | 160.0 | 0.9 | 65.0 | 6.6  | 6.2  | 6.2  | 333.0 | 3.41  | 0.27  |
| 10MI26-6 | 01/27/2012 | 157.0 | 0.9 | 61.0 | 7.1  | 6.4  | 6.2  | 320.0 | 3.21  | 0.34  |
| 10MI26-6 | 02/22/2012 | 154.0 | 0.9 | 62.0 | 7.1  | 6.7  | 6.3  | 317.0 | 3.13  | 0.35  |
| 10MI26-6 | 03/02/2012 | 154.0 | 0.9 | 61.0 | 7.1  | 6.8  | 6.5  | 315.0 | 3.07  | 0.29  |
| 10MI26-6 | 05/08/2012 | 152.0 | 0.9 | 60.0 | 7.2  | 7.0  | 6.5  | 314.0 | 3.00  | 0.32  |
| 10MI26-6 | 05/29/2012 | 154.0 | 0.9 | 61.0 | 7.2  | 6.9  | 6.5  | 318.0 | 3.06  | 0.32  |
| 10MI26-6 | 06/11/2012 | 155.0 | 0.9 | 63.0 | 7.0  | 6.8  | 6.5  | 323.0 | 3.14  | 0.29  |
| 10MI26-6 | 07/18/2012 | 152.0 | 0.9 | 61.0 | 7.0  | 6.7  | 6.5  | 313.0 | 3.04  | 0.26  |
| 10MI26-6 | 08/22/2012 | 115.0 | 0.7 | 32.0 | 9.7  | 10.0 | 8.0  | 183.0 | 0.72  | 0.23  |
| 10MI26-6 | 09/26/2012 | 108.0 | 0.6 | 27.0 | 11.0 | 12.0 | 8.2  | 161.0 | 0.08  | 0.53  |
| 10MI26-6 | 10/17/2012 | 106.0 | 0.6 | 26.0 | 10.0 | 13.0 | 8.3  | 154.0 | 0.03  | 0.46  |
| 10MI26-6 | 11/16/2012 | 103.0 | 0.6 | 24.0 | 11.0 | 12.0 | 8.1  | 139.0 | -0.09 | 0.52  |
| 10MI26-6 | 12/05/2012 | 102.0 | 0.6 | 23.0 | 11.0 | 11.0 | 8.6  | 144.0 | -0.14 | 0.23  |
| 10MI26-6 | 02/20/2013 | 116.0 | 0.6 | 26.0 | 9.6  | 9.0  | 8.3  | 175.0 | 0.53  | -0.12 |
| 10MI26-6 | 03/11/2013 | 112.0 | 0.6 | 27.0 | 9.1  | 8.3  | 8.2  | 175.0 | 0.58  | -0.27 |
| 10MI26-6 | 06/17/2013 | 111.0 | 0.6 | 24.0 | 9.3  | 9.2  | 8.6  | 163.0 | 0.34  | -0.26 |
| 10MI26-6 | 09/11/2013 | 109.0 | 0.6 | 20.0 | 8.2  | 4.0  | 8.4  | 165.0 | 0.72  | -1.12 |
| 10MI26-6 | 11/20/2013 | 110.0 | 0.6 | 24.0 | 9.4  | 8.3  | 8.5  | 167.0 | 0.40  | -0.34 |
| 10MI26-6 | 02/14/2014 | 106.0 | 0.6 | 23.0 | 9.0  | 8.0  | 8.5  | 153.0 | 0.33  | -0.47 |
| 09MI21-2 | 07/14/2010 | 148.0 | 0.4 | 26.0 | 4.0  | 0.2  | 8.2  | 253.0 | 2.11  | -2.24 |
| 09MI21-2 | 09/16/2010 | 136.0 | 0.4 | 24.0 | 4.7  | 0.2  | 9.1  | 233.0 | 1.59  | -2.45 |
| 09MI21-2 | 11/05/2010 | 126.0 | 0.4 | 21.0 | 5.1  | 0.2  | 9.6  | 203.0 | 1.16  | -2.59 |
| 09MI21-2 | 11/29/2010 | 126.0 | 0.4 | 21.0 | 5.1  | 0.3  | 9.2  | 203.0 | 1.23  | -2.46 |
| 09MI21-2 | 12/13/2010 | 125.0 | 0.4 | 20.0 | 5.5  | 0.3  | 9.2  | 199.0 | 1.15  | -2.40 |
| 09MI21-2 | 01/13/2011 | 127.0 | 0.4 | 20.0 | 5.5  | 0.4  | 9.4  | 199.0 | 1.14  | -2.44 |
| 09MI21-2 | 02/24/2011 | 123.0 | 0.4 | 20.0 | 5.5  | 0.3  | 9.6  | 194.0 | 1.03  | -2.53 |
| 09MI21-2 | 03/01/2011 | 121.0 | 0.4 | 19.0 | 5.8  | 0.3  | 9.7  | 189.0 | 0.92  | -2.53 |
| 09MI21-2 | 04/21/2011 | 119.0 | 0.4 | 19.0 | 5.4  | 0.6  | 9.5  | 187.0 | 0.94  | -2.49 |
| 09MI21-2 | 07/05/2011 | 119.0 | 0.4 | 19.0 | 5.6  | 0.4  | 9.7  | 187.0 | 0.90  | -2.55 |
| 09MI21-2 | 08/12/2011 | 119.0 | 0.4 | 19.0 | 5.5  | 0.3  | 9.7  | 187.0 | 0.91  | -2.58 |
| 09MI21-2 | 10/28/2011 | 118.0 | 0.4 | 18.0 | 6.4  | 0.4  | 9.6  | 182.0 | 0.80  | -2.40 |
| 09MI21-2 | 12/05/2011 | 118.0 | 0.4 | 19.0 | 5.2  | 0.4  | 9.5  | 185.0 | 0.95  | -2.56 |
| 09MI21-2 | 02/06/2012 | 117.0 | 0.4 | 19.0 | 5.2  | 0.3  | 9.5  | 182.0 | 0.93  | -2.57 |
| 09MI21-2 | 05/24/2012 | 117.0 | 0.4 | 19.0 | 5.2  | 0.3  | 9.5  | 182.0 | 0.93  | -2.57 |
| 09MI21-2 | 06/13/2012 | 118.0 | 0.4 | 19.0 | 5.4  | 0.3  | 9.6  | 184.0 | 0.91  | -2.57 |
| 09MI21-2 | 08/30/2012 | 117.0 | 0.4 | 19.0 | 4.5  | 0.5  | 9.6  | 184.0 | 0.97  | -2.69 |
| 09MI21-2 | 10/23/2012 | 120.0 | 0.4 | 20.0 | 4.9  | 0.4  | 9.6  | 187.0 | 1.01  | -2.63 |
| 09MI21-2 | 12/04/2012 | 120.0 | 0.4 | 19.0 | 4.7  | 0.0  | 9.6  | 187.0 | 1.04  | -2.72 |
| 09MI21-2 | 02/19/2013 | 121.0 | 0.4 | 19.0 | 4.5  | 0.2  | 9.5  | 189.0 | 1.09  | -2.69 |
| 09MI21-2 | 03/11/2013 | 122.0 | 0.4 | 20.0 | 4.9  | 0.2  | 9.6  | 193.0 | 1.07  | -2.65 |
| 09MI21-2 | 06/25/2013 | 121.0 | 0.4 | 21.0 | 4.9  | 0.3  | 9.4  | 191.0 | 1.09  | -2.57 |
| 09MI21-2 | 09/24/2013 | 122.0 | 0.4 | 21.0 | 5.2  | 0.2  | 9.2  | 200.0 | 1.16  | -2.46 |
| 09MI21-2 | 11/06/2013 | 124.0 | 0.4 | 22.0 | 4.9  | 0.3  | 9.3  | 199.0 | 1.20  | -2.52 |
| 09MI21-2 | 02/04/2014 | 121.0 | 0.4 | 21.0 | 4.6  | 0.3  | 9.3  | 194.0 | 1.15  | -2.58 |
| 09MI21-3 | 07/14/2010 | 86.0  | 0.3 | 14.0 | 7.9  | 1.3  | 13.0 | 109.0 | -0.98 | -3.29 |
| 09MI21-3 | 09/16/2010 | 101.0 | 0.3 | 15.0 | 7.0  | 0.6  | 12.0 | 149.0 | -0.27 | -3.16 |
| 09MI21-3 | 11/05/2010 | 84.0  | 0.3 | 14.0 | 8.0  | 0.8  | 12.0 | 110.0 | -0.79 | -3.03 |
| 09MI21-3 | 11/29/2010 | 86.0  | 0.3 | 14.0 | 7.6  | 0.7  | 12.0 | 115.0 | -0.70 | -3.10 |
| 09MI21-3 | 12/13/2010 | 87.0  | 0.4 | 15.0 | 8.1  | 0.7  | 11.0 | 117.0 | -0.40 | -2.63 |
| 09MI21-3 | 01/13/2011 | 90.0  | 0.4 | 15.0 | 7.9  | 0.7  | 12.0 | 120.0 | -0.52 | -2.97 |
| 09MI21-3 | 02/24/2011 | 89.0  | 0.4 | 15.0 | 7.8  | 0.7  | 12.0 | 121.0 | -0.52 | -2.99 |
| 09MI21-3 | 03/01/2011 | 88.0  | 0.4 | 15.0 | 8.4  | 0.7  | 12.0 | 120.0 | -0.59 | -2.89 |
| 09MI21-3 | 04/21/2011 | 87.0  | 0.4 | 14.0 | 7.8  | 0.7  | 12.0 | 115.0 | -0.58 | -3.00 |
| 09MI21-3 | 07/05/2011 | 88.0  | 0.3 | 15.0 | 7.7  | 1.0  | 12.0 | 117.0 | -0.68 | -3.04 |
| 09MI21-3 | 08/12/2011 | 89.0  | 0.4 | 15.0 | 7.6  | 0.6  | 12.0 | 120.0 | -0.50 | -3.03 |
| 09MI21-3 | 10/28/2011 | 89.0  | 0.4 | 14.0 | 6.9  | 0.6  | 11.0 | 117.0 | -0.26 | -2.85 |
| 09MI21-3 | 12/05/2011 | 89.0  | 0.4 | 15.0 | 7.3  | 0.6  | 11.0 | 123.0 | -0.26 | -2.77 |
| 09MI21-3 | 02/06/2012 | 90.0  | 0.4 | 16.0 | 7.3  | 0.5  | 11.0 | 124.0 | -0.23 | -2.78 |

|          |            |       |     |       |     |     |      |       |       |       |
|----------|------------|-------|-----|-------|-----|-----|------|-------|-------|-------|
| 09MI21-3 | 05/24/2012 | 94.0  | 0.4 | 16.0  | 7.1 | 0.5 | 11.0 | 133.0 | -0.12 | -2.80 |
| 09MI21-3 | 06/13/2012 | 94.0  | 0.4 | 16.0  | 6.5 | 0.5 | 11.0 | 134.0 | -0.06 | -2.89 |
| 09MI21-3 | 08/30/2012 | 97.0  | 0.4 | 18.0  | 6.6 | 0.5 | 11.0 | 141.0 | 0.03  | -2.86 |
| 09MI21-3 | 10/23/2012 | 96.0  | 0.4 | 17.0  | 6.7 | 0.3 | 11.0 | 138.0 | -0.01 | -2.88 |
| 09MI21-3 | 12/04/2012 | 99.0  | 0.4 | 18.0  | 6.4 | 0.3 | 11.0 | 145.0 | 0.10  | -2.91 |
| 09MI21-3 | 02/19/2013 | 102.0 | 0.4 | 19.0  | 6.3 | 0.2 | 10.0 | 153.0 | 0.40  | -2.61 |
| 09MI21-3 | 03/11/2013 | 100.0 | 0.4 | 19.0  | 6.9 | 0.2 | 10.0 | 150.0 | 0.30  | -2.52 |
| 09MI21-3 | 06/25/2013 | 104.0 | 0.4 | 21.0  | 6.4 | 0.3 | 10.0 | 161.0 | 0.46  | -2.56 |
| 09MI21-3 | 09/24/2013 | 106.0 | 0.4 | 22.0  | 6.7 | 0.2 | 9.8  | 172.0 | 0.56  | -2.45 |
| 09MI21-3 | 11/06/2013 | 108.0 | 0.4 | 22.0  | 6.1 | 0.3 | 10.0 | 169.0 | 0.59  | -2.59 |
| 09MI21-3 | 02/04/2014 | 105.0 | 0.4 | 22.0  | 6.1 | 0.4 | 9.9  | 166.0 | 0.55  | -2.56 |
| 09MI21-4 | 07/14/2010 | 133.0 | 0.4 | 23.0  | 4.6 | 0.4 | 9.2  | 219.0 | 1.46  | -2.49 |
| 09MI21-4 | 09/16/2010 | 129.0 | 0.4 | 22.0  | 5.0 | 0.4 | 9.5  | 218.0 | 1.29  | -2.53 |
| 09MI21-4 | 11/05/2010 | 132.0 | 0.4 | 22.0  | 4.8 | 0.3 | 9.2  | 218.0 | 1.42  | -2.48 |
| 09MI21-4 | 11/29/2010 | 133.0 | 0.4 | 22.0  | 4.7 | 0.3 | 8.7  | 220.0 | 1.55  | -2.33 |
| 09MI21-4 | 12/13/2010 | 133.0 | 0.4 | 22.0  | 4.9 | 0.3 | 8.7  | 216.0 | 1.51  | -2.31 |
| 09MI21-4 | 01/13/2011 | 135.0 | 0.4 | 22.0  | 4.9 | 0.4 | 8.9  | 217.0 | 1.50  | -2.35 |
| 09MI21-4 | 02/24/2011 | 131.0 | 0.4 | 22.0  | 4.9 | 0.4 | 9.1  | 213.0 | 1.39  | -2.42 |
| 09MI21-4 | 03/01/2011 | 122.0 | 0.4 | 20.0  | 5.9 | 0.4 | 9.7  | 192.0 | 0.94  | -2.49 |
| 09MI21-4 | 04/21/2011 | 132.0 | 0.4 | 22.0  | 4.9 | 0.5 | 8.9  | 215.0 | 1.44  | -2.34 |
| 09MI21-4 | 07/05/2011 | 128.0 | 0.4 | 21.0  | 5.0 | 0.3 | 9.2  | 208.0 | 1.29  | -2.46 |
| 09MI21-4 | 08/12/2011 | 129.0 | 0.4 | 21.0  | 5.0 | 0.3 | 9.1  | 210.0 | 1.33  | -2.43 |
| 09MI21-4 | 10/28/2011 | 127.0 | 0.4 | 20.0  | 4.8 | 0.3 | 9.1  | 202.0 | 1.28  | -2.48 |
| 09MI21-4 | 12/05/2011 | 129.0 | 0.4 | 21.0  | 4.9 | 0.3 | 8.9  | 209.0 | 1.38  | -2.38 |
| 09MI21-4 | 02/06/2012 | 127.0 | 0.4 | 21.0  | 4.6 | 0.3 | 8.9  | 203.0 | 1.35  | -2.44 |
| 09MI21-4 | 05/24/2012 | 126.0 | 0.4 | 20.0  | 5.0 | 0.3 | 9.1  | 202.0 | 1.25  | -2.45 |
| 09MI21-4 | 06/13/2012 | 127.0 | 0.4 | 21.0  | 4.3 | 0.6 | 9.1  | 205.0 | 1.33  | -2.51 |
| 09MI21-4 | 08/30/2012 | 128.0 | 0.4 | 21.0  | 4.8 | 0.4 | 9.2  | 206.0 | 1.30  | -2.48 |
| 09MI21-4 | 10/23/2012 | 132.0 | 0.4 | 22.0  | 4.8 | 0.0 | 9.0  | 213.0 | 1.45  | -2.46 |
| 09MI21-4 | 12/04/2012 | 132.0 | 0.4 | 22.0  | 4.4 | 0.2 | 9.0  | 213.0 | 1.48  | -2.50 |
| 09MI21-4 | 02/19/2013 | 129.0 | 0.4 | 21.0  | 4.7 | 0.0 | 9.1  | 208.0 | 1.37  | -2.52 |
| 09MI21-4 | 03/11/2013 | 131.0 | 0.4 | 22.0  | 5.3 | 0.2 | 8.9  | 214.0 | 1.41  | -2.32 |
| 09MI21-4 | 06/25/2013 | 130.0 | 0.4 | 22.0  | 5.0 | 0.2 | 9.0  | 210.0 | 1.38  | -2.41 |
| 09MI21-4 | 09/24/2013 | 127.0 | 0.4 | 21.0  | 5.1 | 0.2 | 9.0  | 208.0 | 1.31  | -2.40 |
| 09MI21-4 | 11/06/2013 | 129.0 | 0.4 | 22.0  | 4.8 | 0.2 | 9.1  | 208.0 | 1.36  | -2.47 |
| 09MI21-4 | 02/04/2014 | 126.0 | 0.4 | 21.0  | 4.7 | 0.2 | 9.0  | 203.0 | 1.31  | -2.47 |
| 12MI33-1 | 03/08/2013 | 183.0 | 0.9 | 80.0  | 3.6 | 0.2 | 6.3  | 409.0 | 4.80  | -0.90 |
| 12MI33-1 | 06/27/2013 | 167.0 | 1.0 | 81.0  | 6.6 | 2.2 | 5.4  | 376.0 | 4.35  | 0.16  |
| 12MI33-1 | 12/02/2013 | 194.0 | 0.9 | 98.0  | 4.3 | 0.0 | 5.8  | 461.0 | 5.40  | -0.51 |
| 12MI33-2 | 06/27/2013 | 183.0 | 1.0 | 86.0  | 5.9 | 0.3 | 6.2  | 413.0 | 4.80  | -0.38 |
| 12MI33-2 | 12/02/2013 | 169.0 | 0.7 | 50.0  | 5.5 | 0.2 | 7.1  | 328.0 | 3.40  | -1.22 |
| 12MI33-3 | 06/27/2013 | 180.0 | 1.0 | 80.0  | 4.9 | 0.2 | 6.3  | 401.0 | 4.72  | -0.63 |
| 12MI33-3 | 12/02/2013 | 152.0 | 0.6 | 31.0  | 5.4 | 0.3 | 7.6  | 265.0 | 2.49  | -1.63 |
| 12MI33-4 | 03/19/2013 | 166.0 | 0.7 | 52.0  | 3.8 | 0.6 | 6.9  | 327.0 | 3.54  | -1.38 |
| 12MI33-4 | 06/27/2013 | 166.0 | 0.8 | 56.0  | 5.9 | 0.0 | 6.9  | 329.0 | 3.55  | -1.03 |
| 12MI33-4 | 12/02/2013 | 173.0 | 0.8 | 62.0  | 5.1 | 0.3 | 6.5  | 358.0 | 3.96  | -0.93 |
| 12MI33-5 | 02/18/2013 | 170.0 | 0.8 | 70.0  | 4.2 | 0.2 | 6.9  | 366.0 | 4.05  | -1.17 |
| 12MI33-5 | 06/27/2013 | 181.0 | 0.9 | 80.0  | 4.9 | 0.2 | 6.4  | 402.0 | 4.61  | -0.73 |
| 12MI33-5 | 12/02/2013 | 213.0 | 1.1 | 124.0 | 3.3 | 0.0 | 5.5  | 542.0 | 6.66  | -0.21 |
