# Supplementary material for: Hydrochemical disturbances measured in groundwater during the construction and operation of a large-scale underground facility in deep crystalline rock in Japan
Source: Springer Nature journal article supplement (doi:10.1007/s12665-015-4337-3), 2015-04-07

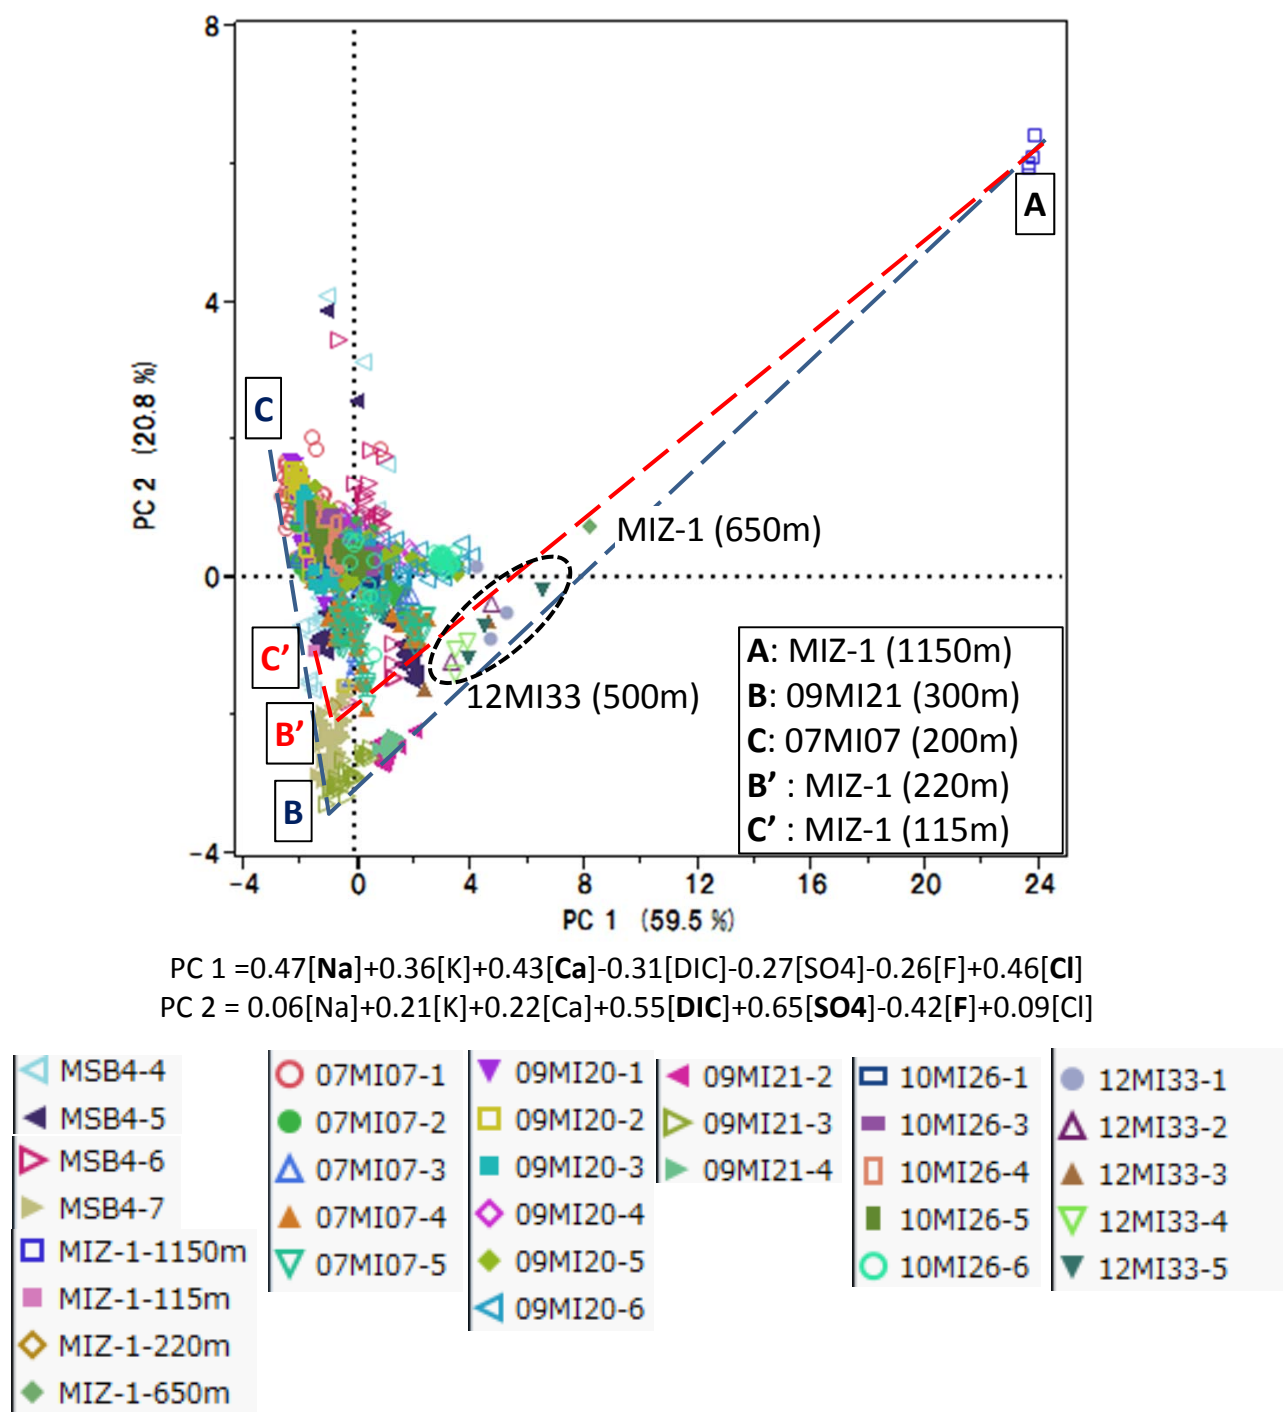

Fig. Results of principal component analysis. Following figures show the highlight plot data in each borehole. Arrows show variation with time.

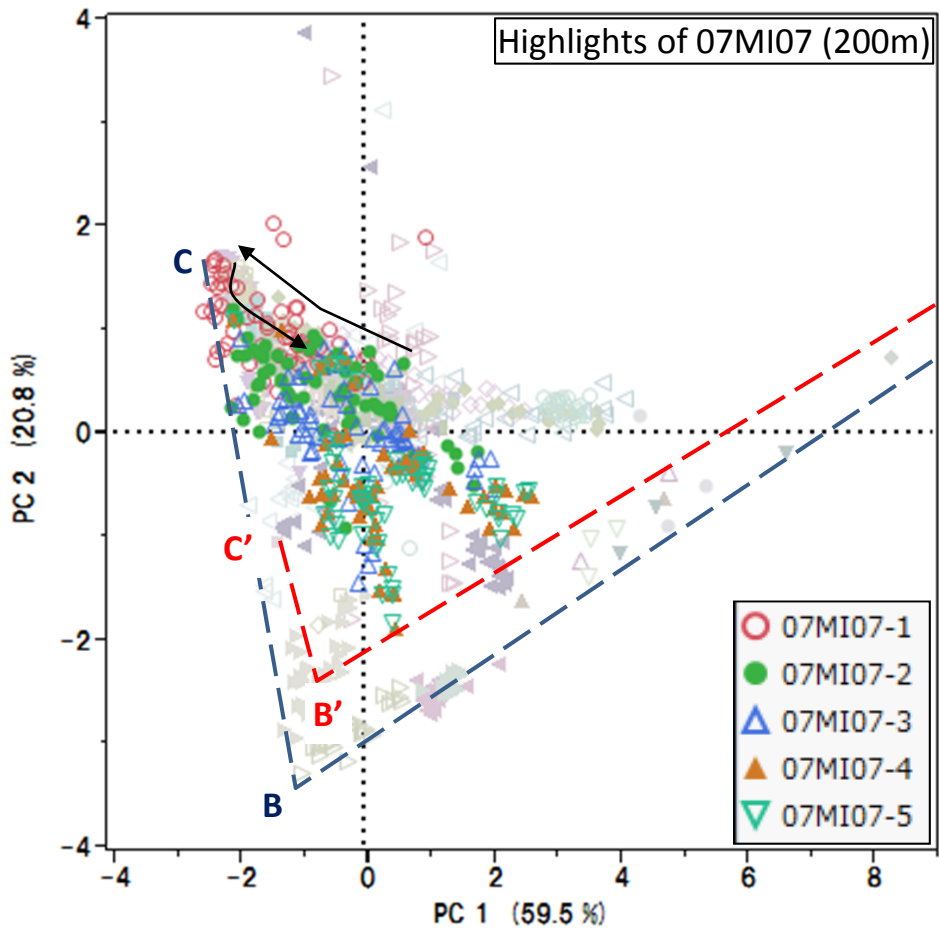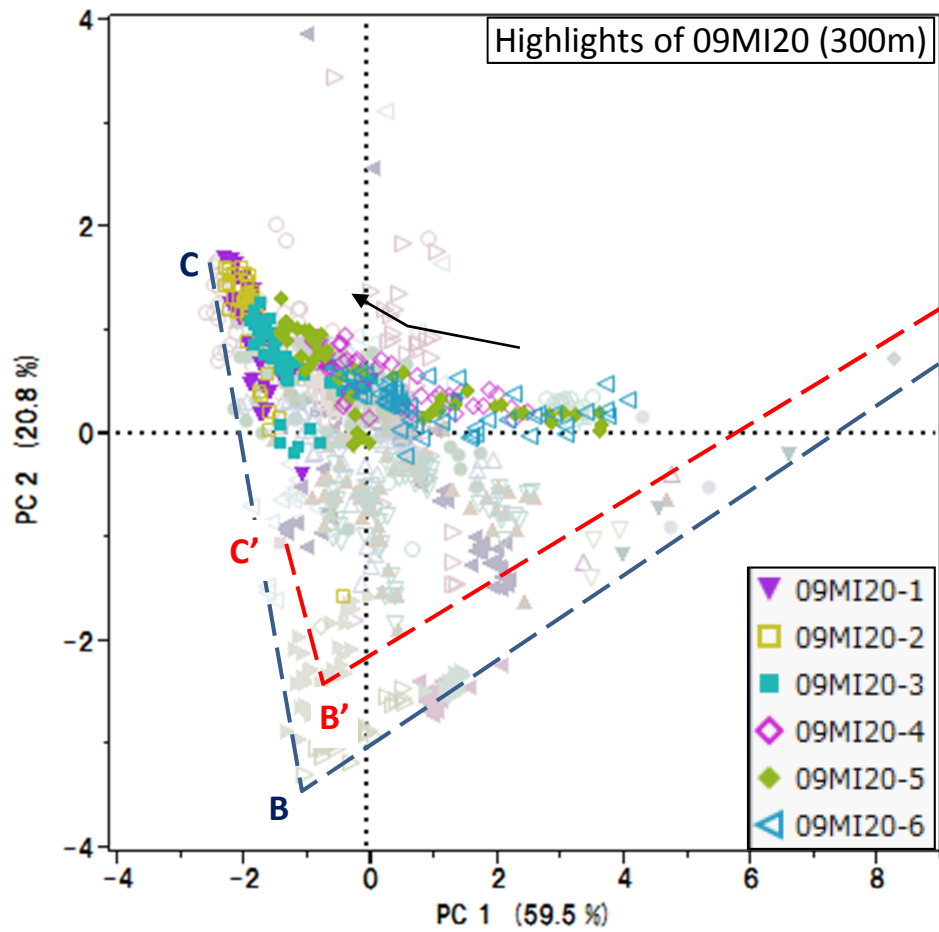

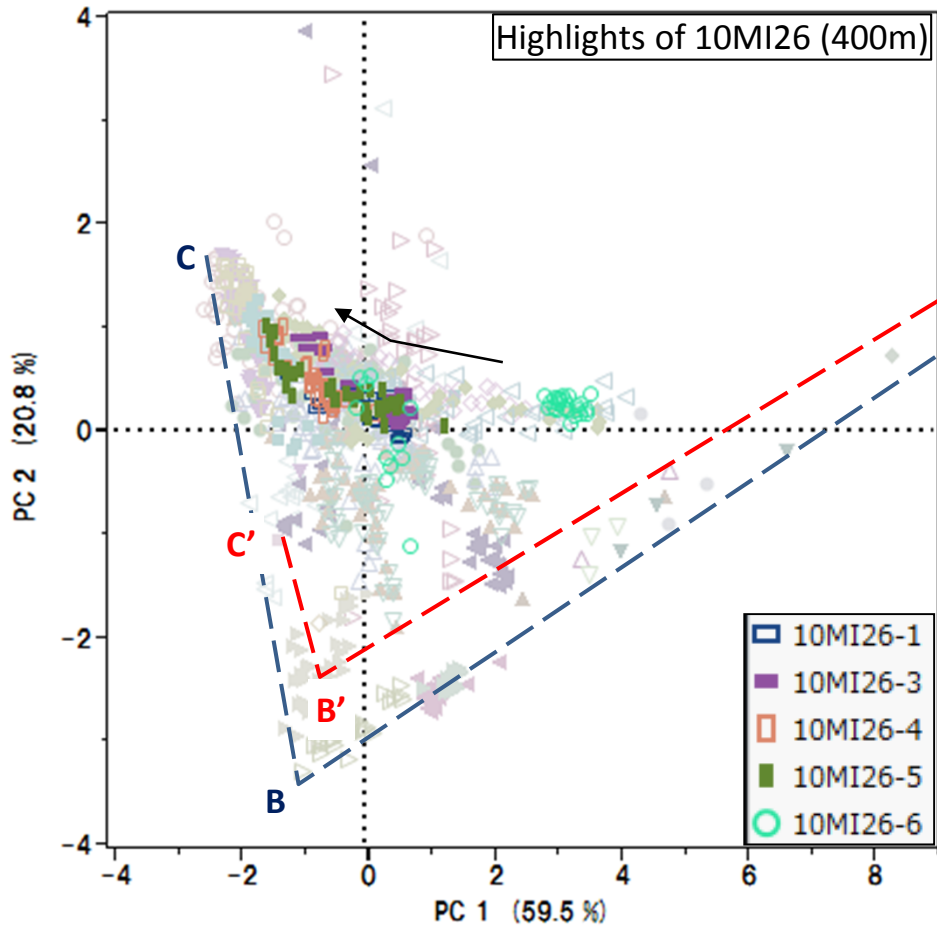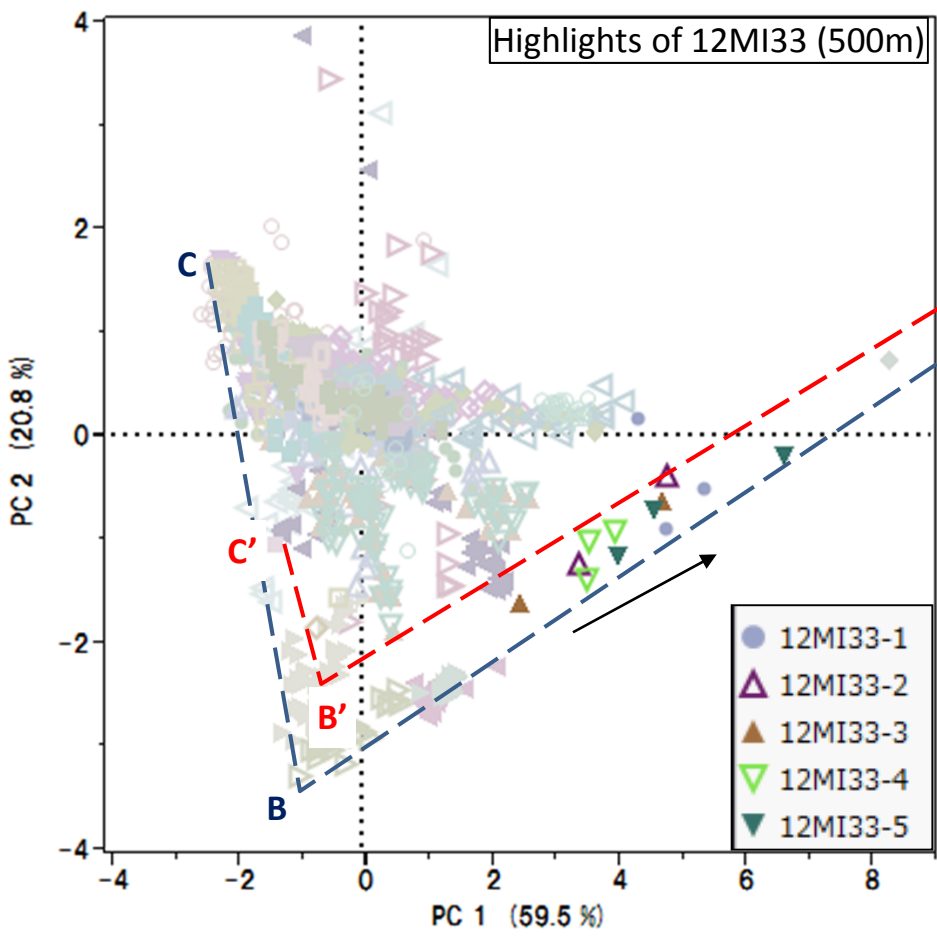

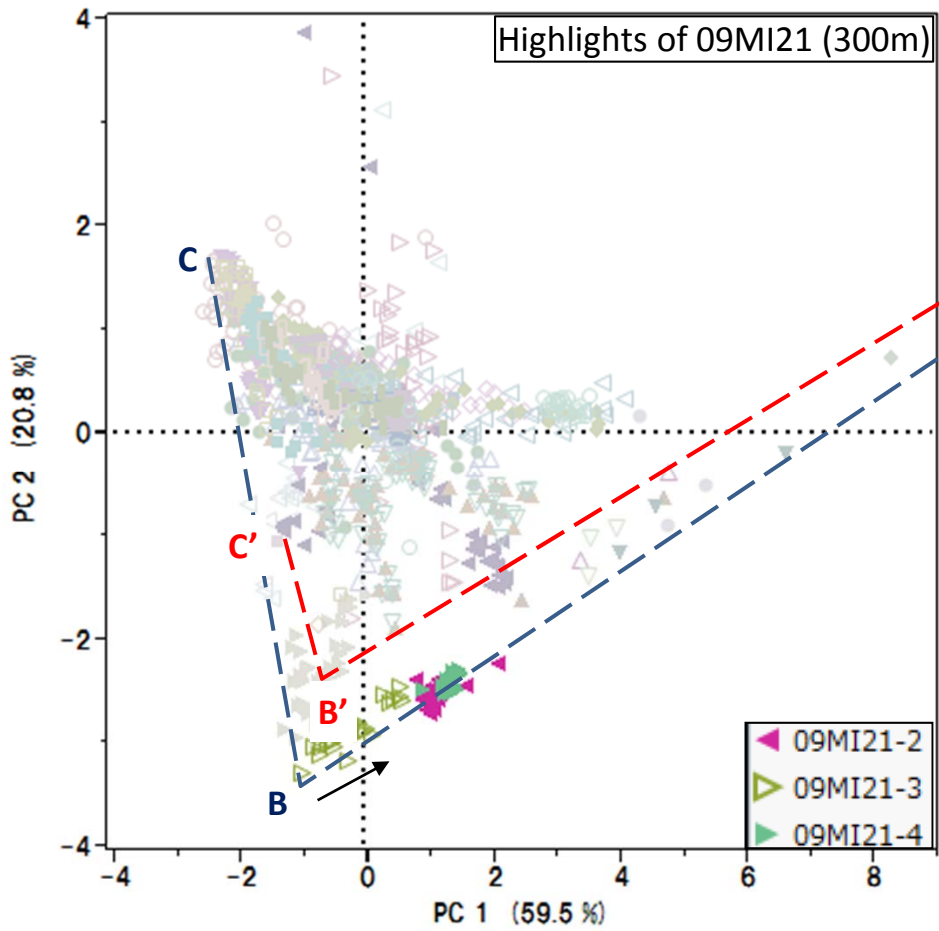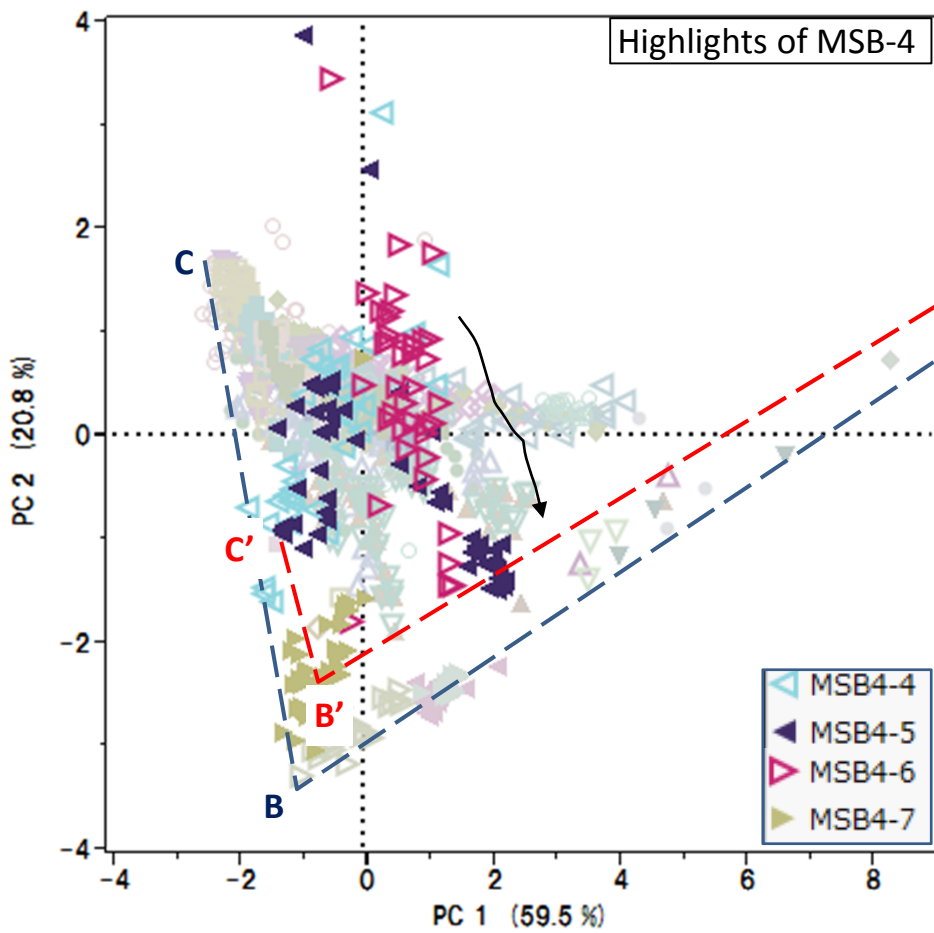

Supplement: MOESM3 [file 11841478]
